# Supplementary material for: Peptidomics Study of Plant-Based Meat Analogs as a Source of Bioactive Peptides
Source: MDPI journal article supplement (doi:10.3390/foods12051061), 2023-03-02
Supplement: s1 [file s1]

Table S1. Prediction of peptides released by gastrointestinal proteases through *in silico* hydrolysis of PBMA.

| Materials | Peptide fragments                                                                                                                                                                                                                                                                                                                                                                                                                                                                                                                                                                                                                                                                                                                                                                                                                                                                                                                                                                                                                                                                                                                                                                                                                                                                                                                                                                                                                                                                                                                                                                                                                                                                                                                                                                                                                                                                                                                                                                                                                                                                                                                                                                                                                                                                                                                                                                                                                                                                                                                                                                                                                                                                                                                                                                                                                                                                                                                           |
|-----------|---------------------------------------------------------------------------------------------------------------------------------------------------------------------------------------------------------------------------------------------------------------------------------------------------------------------------------------------------------------------------------------------------------------------------------------------------------------------------------------------------------------------------------------------------------------------------------------------------------------------------------------------------------------------------------------------------------------------------------------------------------------------------------------------------------------------------------------------------------------------------------------------------------------------------------------------------------------------------------------------------------------------------------------------------------------------------------------------------------------------------------------------------------------------------------------------------------------------------------------------------------------------------------------------------------------------------------------------------------------------------------------------------------------------------------------------------------------------------------------------------------------------------------------------------------------------------------------------------------------------------------------------------------------------------------------------------------------------------------------------------------------------------------------------------------------------------------------------------------------------------------------------------------------------------------------------------------------------------------------------------------------------------------------------------------------------------------------------------------------------------------------------------------------------------------------------------------------------------------------------------------------------------------------------------------------------------------------------------------------------------------------------------------------------------------------------------------------------------------------------------------------------------------------------------------------------------------------------------------------------------------------------------------------------------------------------------------------------------------------------------------------------------------------------------------------------------------------------------------------------------------------------------------------------------------------------|
|           | <p>VL, GF, HG, IR, EK, DK, HL, HK, YL, EF, AL, EL, MGL, TAL, HAK, GGIL, IPVK, ASEDL, HPSDF, NAWGK, TEAEMK, HGNTVL, SDGEWQL, TGHPETL, AESHANK, NDMAAQYK, GHHEAEVK, ISDAIHVL, GADAQAAMSK, VEADVAGHGQEV, DL, SL, SR, NL, EF, DF, HF, NF, NK, GL, QL, EL, YK, AF, PTR, DSR, SSR, VPL, QSL, EPF, DGR, VYF, NVK, ADK, VVR, AQK, AIK, AVK, EGL, IHL, APK, DVK, GNK, EEK, MSIF, DQVF, HPEL, SIPL, SPEK, VWAK, IDWEF, PQMAL, DWAER, ESVMK, VDPHF, PPSVDR, TAMDNAF, DAYEVGK, MVVEAPL, AEEITIK, EMSAIQPR, EYTQPGEL, HDDIVNMHR, VYVHGVGTGK, TQAEIVDGL, SVACGDAAMSESVGR, NHIQATITDDVL, VIEAPVNEPNYK, AIQPSEVQER, EIVTAEDGSK, TENASHSEHR, VTPEVVDASK, VR, EL, YR, DL, ER, QK, GR, DK, ML, AK, SK, TK, TR, AL, QR, SR, NR, NL, EK, TL, DR, QL, VK, QF, EL, VR, AR, MK, ISR, ESR, EDL, DAR, AER, DEL, AEK, SQL, GQL, EGL, AAL, DDL, SSL, QAR, TVR, EEL, MAK, EIK, THR, TDR, ENR, ETK, SAL, TDL, EAL, SQL, DNL, NHL, ENK, ENL, AQR, IAL, SQL, SDR, ADR, EAF, YER, QNR, MIL, QDL, AYK, ATR, GNR, EGR, TIIR, DSQL, MSHSVK, GTSPSTVR, NANEMSIQL, DTMAER, SGTSSQTHDAIR, DMEISK, ENANAAF, ETAEATL, HNTMISEISSEVENL, EIDNVL, DGAL, ASAESK, TDDL, QMADANSK, AAENF, ANQEYEAQVVT, ESQ, AMDEDAR, QTQL, QMDYDNL, YEEEEAEAAGNL, NQVAK, NADMAAL, TEEF, ITEL, EDMAEHER, ANNL, QAENEAL, AAENGEL, QAENL, ANEL, IDMTVEINTL, NSANSAL, EADNMR, GQVGDL, IANL, GDQL, DANR, EAER, ASAL, HDAEEAL, EMEAK, YVASQNAL, SEMEQ, DEEL, STTR, TIEEL, TTTISEMEVR, SDMSR, YEATISEL, EVQL, DVANK, ANANL, VQEL, QAAL, EDER, EAAESNL, QVSR, ASEVEEIR, NAESEL, NDANGR, ISEL, SVNTL, TNDK, EGDIGVMQGD, DEAVNAR, AAEDR, NAEVL, ADEL, QEENYXR, AETL, EIEIR, EITVK, EEAEAF, MVQK, EAEL, DGEIR, ANAR, QTQSEDDK, TQIK, EEQEEVSQL, TMSK, AQQQIEEAHR, ADMAER, TITIK, TIGGPGSR, AVSVVR, EINSVSR, ATSIM, ML, GK, NK, TIK, VK, VTTAESQL, EF, EMQK, NAL, GQDL, DQVVR, TIGL, EVWYF, GIQYVDK, DGNPTF, DK, IL, SNDF, APGSEL, DF, MVK, YPENVEEEL, IQTCTITHF, YL, QVK, SDIMSGK, IYCPTDTAVL, ASYACVAK, YGPYDPQSCP, SL, PIDR, IPGK, DQYDQTDEQWF, DR, IVTYK, DHHDMSR, EDAMVQYL, QIAQDL, EMYGVETF, NIK, NK, GTSL, VL, GVDAL, GL, SIYEPDNL, DPK, IGF, PWSEIR, NL, SF, HDK, IIK, PADK, SAK, EF, YF, VEK, SK, INK, IL, AL, CTGNHEL, YMR, SDSIEVQQMK, IQAK, EER, EL, EAEK, QR, EER, QR, MENEQK, QEL, AQML, QK, ESDL, ADMK, ASAYEGK, IAEL, ESL, NQER, HAR, ESL, QK, SQDK, AEMNR, EETEASVEER, NR, VAER, DR, VQR, EVETQK, VAMAAMEAEK, VQAETEIR, IMR, EK, HDAQR, NPNVNGSGDAASQDDESEAK, EL, EVIPDAK, IEETR, VTMVSK, NESL, QTK, ANL, EL, SSTR, DPSK, MR, DIDR, HHEYNV, EGNDK, YK, TL, NIR, GNTMCR, VEQF, ESM, MK, PK, NQSPTK, IQAEIK, TL, EK, NK, TPR, WK, HNTDK, NPGGDK, NPGGDK, NPGENTEHD, NPGGDK, NPPEIK, TQ, MSAF, SF, HR, TL, CSASTL, SL, WAF, QACVL, CL, ISAIL, DSSIWL, WVVVEPSEL, GPL, GVS GPL, GVS GPL, GVS GPL, GVS GPL, GVS GPL, GVS GPL, CF, QVP, MK, TQSQAK, IPGGNTEPGK, NPGGNTEPGK, NPGEEMNPGNNMTPGSNSENNGNNQNTPIK, SL, PAIISNSNQQL, GEINK, NDGQSIL, GAL, EK, NR, SL, NL, DK, SQL, DVK, NIK, TASAIVF, AK, NSTK,</p> |



---

VVAQQAGNEEGF, EYVVF, TNDR, AAVSHVNQVF, ATPGEVL, ANAF, GL, HSQVAQIK, SNGNR, GPL, VQPQSQ, KGGL, IISPPEKQAR, HQR,  
 GSQKGKSR, QGDNGL, EETVCTAKL, NIGPSSSPDIYNPEAGR, IKTVTSL, DL, PVL, WL, KL, SAEHGSL, HKNTMF, VPHYNL, NANSIYAL, KGR, AR,  
 QVVNCNGNTVF, DGKL, EAGR, AL, TVPQNYAVAAKSL, NDR, SYVAF, KTNDR, AGIAR, AGTSSVINDL, PL, DVVAATF, KL, QR, DEAR, QL, KSNPFP,  
 KF, VPAR, QSEN, ASA, MSK, PSL, SL, ASACL, ATR, SEF, DR, NQCQL, DNINAL, EPDHR, VESEAGL, TETWNPNNPEL, CAGVSL, IR, TIDPNGL, HL,  
 PSF, SPSPQL, IF, IIQ GK, GVL, GL, PGCPETYEEPR, SSQSR, QGSR, QQQGD SHQK, MAR, HF, SSF, SL, CF, TTACL, AHHSESDR, NQCQL, DTINAL,  
 EPDHR, VESEAGL, TETWNPNNPEL, CAGVSL, IR, TIDPNGL, HL, PSYSPSPQL, IF, IIQ GK, GVL, GL, AVPGCPETYEEPR, SQSR, QQQQR, DSHQK, SK,  
 GDVIAIPPGIPYWTYNHGHEPL, VAITL, DTSNTL, NQL, DSTPR, VF, YL, GGNPEIEF, PETQQK, QHEPR, QQR, YSF, VGR, GGQQQEEEEEEQNEGNSVL,  
 SGF, NVEF, AHSL, NTK, EDTAK, SPQDER, GQIVK, VEDGL, HIISPEL, QEEEEQSHSQR, EEEEEQEQR, HR, HSK, EDEDEDEEEEEER, EQR, HR, HSEK,  
 EEEDEDEPR, SYETR, WK, HTAEK, ER, ESHGQEEEEEL, EK, EEEEEGIQR, QHSK, GR, NGL, EETICSAK, IR, ENIAR, PSR, GDL, YNSGAGR, ISTVNSL,  
 TL, PIL, NL, SAEYVL, YR, NGIYAPHWNINANS, YVIR, GEGR, VR, IVNSEGNK, VF, DDK, VSL, GQL, VVVPQNF, VVAQQAGNEEGF, EYVVF, TNDR,  
 AAVSHVNQVF, ATPGEVL, ANAF, GL, HSQVAQIK, SNGNR, GPL, VQPQSQ, MAK, AL, SL, SF, CF, GGCF, AL, EQPQQNECQL, ER, DAL, EPDNR,  
 IESEGGL, IETWNPNNK, QF, CAGVAL, SR, ATL, QR, NAL, PYYSNAPQEIF, IQQGNGYF, GMVF, PGCPETF, EEPQSEQGEGR, YR, DR, HQK, VNR,  
 EGDIIAVPTGIVF, WMYNDQDTPVIAVSL, TDIR, SSNNQL, DQMPR, YL, AGNHEQEF, QYQHQQGGK, QEENEGNNIF, SGF, DF, EDAF, NVNR, HIVDR,  
 QGR, NEDEEK, GAIVK, VK, GGL, SIISPPEK, QAR, HQR, GSR, QEEDEDEEK, QPR, HQR, GSR, QEEEEDEDEER, QPR, HQR, GEEEEEDK, ER, GGSQK,  
 GK, SR, QGDNGL, EETVCTAK, NIGPSSSPDIYNPEAGR, IK, TVTSL, DL, PVL, WL, SAEHGSL, HK, NAMF, VPHYNL, NANSIYAL, GR, AR,  
 QVVNCNGNTVF, DGEL, EAGR, AL, TVPQNYAVAAK, SL, SDR, SYVAF, TNDR, AGIAR, AGTSSVINNL, PL, DVVAATF, NL, QR, NEAR, QL, SNNPF,  
 VPAR, ESEN, ASA, FL, EETVCTL, HEDL, AGSSQADVFNPR, AGR, ITSVNSL, TL, PVL, HL, SAQWVK, YK, NGIFMPHWNL, NANS, MR, VQAQQIR,  
 CQVER, DGL, EHPEDPL, IETR, PNNK, QIR, CAGVPL, SR, PTL, NGL, PL, VL, HWSQEIF, MQQPF, WIL, WDGIPR, VVL, AL, SHK, NL, MK, QGTETDK,  
 VTR, EDIHCCSYWYCIL, GCTR, TK, NSSYCR, SYDIR, SSITSL, IR, CPWR, DSIL, GTPSK, EF, QYEHEQGESAF, AF, AAAAL, AF, SPL, DDAAASSSSSK,  
 DIVK, TR, MR, MR, NK, DTATANIAK, MR, MNL, AAMR, VL, GGAR, SR, VGL, CL, SPL, SL, TK, GPF, VSSSF, PL, QEENEEATTF, QWL,  
 QEDSYPNWYQPGPPSF, GSIEVL, SMVSHK, IAMF, VPL, QPECK, QYNDR, ATK, DR, QEL, SNENVL, VK, VSR, QL, EEL, SK, NAK, SSSR, SVSSESGPF,  
 NL, SEDPL, YSNNNGK, EL, TPEK, NQQL, QDL, DL, VNSVDL, EGSL, PNYNSR, AL, VL, VVNEGK, GDF, EL, VGQR, NENQ GK, EN, MAATTMK, ASF, PL,  
 ML, MGISF, ASVCVSSR, SDPQNPF, IF, SNK, QTL, ENENGHIR, QK, DQR, SK, IF, ENL, QNYR, EYK, SK, PHTIF, PQHTDADYIL, VVL, SGK, AIL, TVL,  
 PDDR, NSF, NL, ER, GDTIK, PAGTIAYL, VNR, DDNEEL, VL, DL, AIPVNR, PGQL, QSF, SGNQNQQNYL, SGF, SK, NIL, EASF, NTDYEEIEK, VL, EEHEK,  
 ETQHR, SL, DK, QQSQEENVIVK, SR, GQIEEL, SK, NAK, STSK, SVSSESEPF, NL, SR, GPIYSNEF, GK, EITPEK, NPQL, QDL, DIF, VNSVEIK, EGSL,  
 PHYNSR, AIVIVTVNEGK, GDF, EL, VGQR, NENQGEQR, EDDEEEEQEEEEINK, QVQNYK, AK, SSGDVF, VIPAGHPVAVK, ASSNL, DL, GF,

---

---

GINAENNQR, NF, AGDEDNVISQIQR, PVK, EL, AF, PGSAQEVDR, IL, ENQK, QSHF, ADAQPQQR, ER, GSR, ETR, DR, SSV, MAATPIK, PL, ML, AIAF, ASVCVSSR, SDQENPF, IF, SNR, QTL, YENENGHIR, QK, DK, SK, IF, ENL, QNYR, EYK, SK, PHTL, PQYTDADF, IL, VVL, SGK, ATL, TVL, SNDR, NSF, NL, ER, GDAIK, PAGTIAYL, ANR, DDNEDL, VL, DL, AIPV NK, PGQL, QSF, SGTQNQPSL, SGF, SK, NIL, EAAF, NTNYEEIEK, VL, EQQEQEPQHR, SL, DR, QEINEENVIVK, VSR, EQIEEL, SK, NAK, SSSK, SVSSESGPF, NL, SR, NPIYSNK, GK, EITPEK, NQQL, QDL, DIF, VNSVDIK, EGSL, PNYNSR, AIVIVTVTEGK, GDF, EL, VGQR, NENQ GK, ENDK, EEEQEEETSK, QVQL, YR, AK, SPGDVF, VIPAGHPVAINASSDL, NL, IGF, GINAENNER, NF, AGEEDNVISQVER, PVK, EL, AF, PGSSHEVDR, NQK, QSYF, ANAQPL, QR, MATTVK, SR, PL, GIIF, ASVCVTYANYDEGSETR, VPGQR, ER, GR, QEGEK, EEK, HGEWR, PSYK, EEHEEEK, QK, YR, YQR, EK, EQK, EVQPGR, ER, WER, EEDEEQVEEWR, GSQR, EDPEER, AR, HR, EER, TK, DR, HQR, EEEEEER, SSESQHR, NPF, SNK, TL, ENENGHIR, QR, DK, SDL, ENL, QNYR, VEYR, AK, PHTIF, PQHIDADL, IL, VVL, NGK, AIL, TVL, SPNDR, NSYNL, ER, GDTIK, IPAGTTSYL, VNQDDEEDL, VVDF, VIPVNR, PGK, EAF, GL, SENK, NQYL, GF, SK, NIL, EASL, NTK, YETIEK, VL, EEQEK, PQQL, DR, TQQGEER, DAIK, VSR, EQIEEL, AK, SSSK, SL, PSEF, EPF, NL, SHK, PEYSNK, GK, EITPEK, YPQL, QDL, DIL, VSCVEINK, GAL, ML, PHYNSR, AIVVL, VNEGK, GNL, EL, GL, NEQQR, EDR, ER, NNEVQR, YEAR, SPGDVVIIPAGHPVAISSNL, NL, GF, GINAK, NNQR, NF, SGSDDNVISQIENPVK, EL, TF, PGSSQEVNR, IK, NQK, QSHF, ASAEPEQK, EEESQR, SPL, SSVL, DSF, MATTIK, SR, PL, GIIF, ASVSVTYANYDEGSEPR, VPAQR, ER, GR, QEGEK, EEK, HGEWR, PSYK, EEDEEEGQR, ER, GR, QEGEK, EEK, HGEWGPSYK, QEDEEEK, QK, YR, YQR, EK, EDEEEK, QK, YQYQR, EK, K, EQK, EVQPGR, ER, WER, EEDEEQVDEEWR, GSQR, R, EDPEER, AR, HR, EER, TK, DR, HQR, EEEEEER, SSESQER, NPF, SNK, TL, ENENGHIR, QR, DK, SDL, ENL, QNYR, VEYR, AK, PHTIF, PQHIDADL, IL, VVL, SGK, AIL, TVL, SPNDR, NSYNL, ER, GDTIK, PAGTTSYL, VNQDDEEDL, VDL, VIPVNGPGK, EAF, DL, AK, NK, NQYL, GF, SK, NIL, EASYNTR, YETIEK, VL, EEQEK, DR, QQGEETDAIVK, VS, MAR, PF, IL, SL, SML, ASACF, AF, SF, STF, NF, NK, CQL, DSL, NAL, EPDQR, VESEGGVIETYNSQHPEL, QCAGVTVSK, HTL, YR, NGL, HL, PSYSPYPK, IHVIQGGQAF, GL, AVPGCPETF, EEPAEGSSR, GR, QQHVQDSHQK, IR, QF, TQGDVIL, IPPGIPYWTF, NTGDEPL, IAVSL, YTSSIHNNL, DQSPR, VF, YL, GGNPDIENPETTK, EQPQQQK, GGGR, QQQEEEEEEAGSVL, SGF, SK, HF, AQSF, NIDEDL, AEK, SPEDDR, QIVK, VEGGL, SIISPMGQEQQQEEEEK, EDEDEDEPR, SR, WEEK, EEEEEEEYETK, HSR, EHGNGIEESICTVK, HESISR, PSR, ADF, YNPK, AGR, ISTL, NSATF, PAL, TPF, GL, SAQYVVL, YK, NGIYAPHWNQNANSVIYVIR, GQGK, VR, VVNNTGDAVF, DR, VL, GQL, VVPQNF, VVAEQASEEGF, EYVVF, TNEMATTTTHMK, QVF, AIPAEVL, ANTYNL, QSQVR, EL, YL, GNQGPL, VNPDSQ, MAK, AL, SL, SHCL, VL, SGCF, ASK, DK, TQQPQQNEYECQL, QR, MNAL, PDNR, IESEGGF, IETWNPNSK, PF, QCAGVAL, SR, CTL, QR, NGL, PF, TNAPQQIF, IQQSGIF, GIIF, SGCPQTF, EEPTQR, GQSQK, PQDR, HQK, VYHF, EGDL, IAVPTGAAF, WMF, NNQDTPVAVSL, IHTNSL, QNQL, DQMPR, YL, AGNQEQEF, VQYQSSQSQK, GK, QHQEQEEDNEGGNIF, SGF, TPEF, EQAL, NVDR, IVK, NL, QGVNEDEEK, GAIVK, VEGGL, SVTAPPTR, QQQR, AEEEEEDDDDEEEK, POK, CK, SK, SR, NGIDETICTMR, HNIGQTPSPDF, NPQAGSITR, ATGL, DF, PAL, SAQF, GSL, NAMF, VPHYNL, NANSIVYAL, EGSAMMQVVNCTGDR, VF, DGEL, QEGQVL, IVPQNF, AVAAK, SQSNNF, YVAF, THDIPVTGTL, AGR, NSL, NAL, PEEVIQHTF, NL, HSEQAR, QIK,

---

---

NNNPF, NF, VPPPR, HSQMR, YVA, MNAL, PDNR, IESEGGF, IETWNPNSK, PF, QCAGVAL, SR, CTL, QR, NGL, PF, TNAPQQIF, IQQSGSIF, GIIF,  
 SGPQTF, EEPTQR, GQSQK, PQDR, HQK, VYHF, EGD, IAVPTGAAF, WMF, NNQDTPVAVSL, IHTNSL, QNQL, DQMPR, YL, AGNQEQEF,  
 VQYQQSQSQK, GK, QHQEQEEDNEGGNIF, SGF, TPEF, EQAL, NVDR, IVK, NL, QGVNEDEEK, GAIVK, VEGGL, SVTAPPTR, QQQR,  
 AEEEEEDDDDEEEK, PQK, SK, SK, SR, NGIDETICTMR, HNIGQTSSPDF, NPQAGSITTATGL, DF, PAL, SAQF, GSL, NAMF, VPHYNL, NANSIVYAL,  
 EGR, AMMQVVNCTGDR, VF, DGEL, QEGQVL, IVPQNF, AVAAK, SQSNF, YVAF, THDIPVTGTL, AGR, NSL, NAL, PEEVIQHTF, NL, SEQAR, QIK,  
 NNNPF, NF, VPPPR, HSQMR, YVA, ML, AIAF, ASVCVSSR, SDQENPF, IF, SNR, QTL, YENENGHIR, QK, DK, SK, IF, ENL, QNYR, EYK, SK, PHTL,  
 PQYTDADF, IL, VVL, SGK, ATL, TVL, SNDR, NSF, NL, ER, GDAIK, PAGSIAYF, ANR, DDNEEPR, VL, DL, AIPVNK, PGQL, QSF, SGTQNQK, SSL, SGF,  
 SK, NIL, EAAF, NTNYEEIEK, VL, EQQEQEPQHR, SL, DR, QEINEENVIVK, VSR, DQIEEL, SK, NAK, SSSK, SVSSESGPF, NL, SR, NPIYSNK, GK, EITPEK,  
 NQQL, QDL, DIF, VNSVDIK, VGSL, PNYNSR, AIVIVTVTEGK, GDF, EL, VGQR, NENQ GK, ENDK, EEEQEEETSK, QVQL, YR, AK, SPGDVF,  
 VIPAGHPVAINASSDL, NL, IGL, GINAENNER, NF, AGEEDNVISQVER, PVK, EL, AF, PGSSHEVD, DNAEIEK, IL, L, EEHEK, ETHHR, GL, DK, QQSQEK,  
 NVIVK, VSK, QIEEL, SK, NAK, SSSK, SVSSR, SEPF, NL, SSDPIYSNQY GK, EITPK, NPQL, QDL, DIF, VNYVEIK, EGSL, WL, PHYNSR, AIVIVTVNEGK,  
 GDF, EL, VGQR, NENQGL, EEDDEEEQR, EEETK, NQVQSYK, AK, TPGDVF, VIPAGHPVAVR, ASSNL, NL, GF, GINAENNQR, NF, AGEEDNVISQIQK,  
 QVK, DL, TF, PGSAQEVDR, ENQK, QSYF, ANAQPPQR, ETR, SQEIK, EHL, YSIL, GAF, MASVK, ASL, IVL, ATL, GMF, TK, NVGAASCNGVCSPF,  
 EMPPCGTSACR, CIPVGL, VIGYCR, NPSGVF, TNDEHPNL, CESDADCR, GSGK, CGHYPNPDIYGWCF, ASK, SEAEDF, SK, ITQK, DL, SVSTA, MASVK,  
 ASL, IVL, ATL, GMF, TK, NVGAISCNGVCSPF, DIPPCGSPL, CR, CIPAGL, VIGNCR, NPYGVF, TNDEHPNL, CESDADCR, GSGTF, CGHYPNPDIYGWCF,  
 ASK, SEAEDVF, SK, ITPK, DL, SVSTA, MASVK, ASL, IVL, ATL, GMF, TK, NVGAASCNGVCSPF, EMPPCGTSACR, CIPVGL, F, IGYCR, NPSGVF,  
 ANDEHPNL, CESDADCR, GSGNF, CGHYPNPDIYGWCF, ASK, SEAEDF, SK, ITPK, DL, SVSTA, MASVK, ASL, MVL, ATL, GMF, TK,  
 NVGAASCNGVCSPF, EMPPCGSSACR, CIPVGL, VVG YCR, HPSGVF, TNDEHPNL, CESDADCR, GSGNF, CGHYPNPDIYGWCF, ASK, SEAEDF, SK,  
 ITQK, DL, SVSTA, MASVK, ASL, IVL, ATL, GMF, TK, NVGAASCNGVCSPF, EMPPCGTSACR, CIPVGL, VVG YCR, NPSGVF, TNDEHPNL, CESDADCR,  
 GSGNF, CGHYPNPDIYGWCF, ASK, SEAEDF, SK, ITPK, DL, SVSTA, MASVK, ASL, IVL, ATL, GMF, TK, NVGAASCNGVCSPF, EMPPCGSSACR,  
 CIPVGL, IGYCR, NPSGVF, GNDEHPNL, CESDADCK, GSGNF, CGHYPNPDIYGWCF, ASK, SEAEDVF, SK, ITPK, DL, SVSTA, TK, PGYINAAF, SSK,  
 NNEAYF, F, INDK, YVL, DYAPGSSR, DK, VL, YGPTPVR, DGF, SL, NQTIF, GSYGIDCSF, DTENNEAF, IF, YENF, CAL, IDYAPHSK, K, DK, IIL, GPK,  
 IADVF, PF, EGTVF, ESGIDAAYR, STR, GK, EVYL, GDQYAR, IDYGSNSMVNK, EIK, SISSGYPCF, NTIF, ESGADA AF, ASHK, TNEVYF, DDHYAR, VK,  
 VTPGGK, AIMDGVR, EIVDYWPSL, DIVPL, MTK, TGYINAAF, SSQNNEAYL, INDK, YVL, DYAPGTSNDK, VL, YGPTPVR, DGF, SL, NQTVF,  
 GSYGVDCSF, DTDNDEAF, IF, YEK, CAL, IDYAPHSNK, DK, IIL, GPK, IADMF, PF, EGTVF, ENGIDAAYR, STR, GK, EVYL, GDQYAR, IDYETNSMVNK,  
 EIK, SIR, NGF, PCF, NTIF, ESGTDA AF, ASHK, TNEVYF, GDYYAR, VTVTPGATDDQIMDGVR, TL, DYWPSL, GIIPL, EN, GSSSCR, CIPWGL, WGTCR,

---

---

YPSGSGR, VIK, VGEHPNL, CESHADCMK, ESGSF, CGR, YPNP, RSK, DCRCIPVGL, VVGYCRHPSGIF, RTTDK, HPNL, CESDADCRK, ESGNF,  
 CGHYNPDP, MPNYF, TPL, VL, IATF, MF, PMK, VEACDGVCSPP, EMPGCGSTDCR, CVPWGL, VGQCINPTSATVEK, MVK, EHPNL, CQSHVDCMEK,  
 GSGSF, CGR, YPNA, MAYVK, APL, VVF, AAF, SIF, PMMK, GEEECGICSS, EMPPCR, SSSCR, CIPVVL, GGNCVDPSSPTIMK, MVEEHSNL, CQSHF,  
 ECMK, GSGSF, CAR, YPNP, MGSVK, APL, AL, ATF, MF, PAK, NVEATDCSGVCSPP, EMPGCGSTDCR, CIPWGL, VGECK, YPTGSR, VTK, MVEK, HPNL,  
 CQSHDDCVHK, ESGSF, CAR, YPNA, MAYVQL, AYL, VVL, ATF, GMF, TQNEAAECNGVCSPP, EMPGCGSSDCR, CIPVGL, VVGYCR, YPSGL,  
 NTIEEHPNL, CK, SNL, DCIEK, ESGK, CGHYNP, MAYVR, THL, VVF, STF, SL, PMK, VGATDCSGICSP, EMPPCR, SSDCR, CIPVL,  
 VGGYCINPISPAATK, MVK, EHPNL, CHSHTDCTK, GSGSF, CAR, YPNP, RSSDCRCIPAL, VMGYCRYPSVSNDVTRMAK, EHPNL, CQSHADCK, NK,  
 RSGSF, CARYNP, MEL, DL, TPR, AETMF, EGDGGGYTWSSSQVPL, AK, NNVCAGR, HPR, GF, AL, PHYADSSK, IGYVIQGTGVDVGL, VL,  
 PNTGEEVVL, GDVIPVPIGSVSWWF, NDGDSDF, IIVF, GETSK, AL, IPGEISYF, TGAL, GIIGGF, STEL, TGK, VYGL, DK, DEVEK, TK, SQIGVL, IIK, DK,  
 SHQHPIK, PQIDITK, VYNIDAL, PENNVENAGL, VK, TL, K, EEDF, PF, IGDVGL, SVIR, VK, EPGA, APSYSIPTVQL, IYIAR, GSGK, IEIVDSNGK, AL,  
 DTK, VEVGHL, VVPQYF, VL, AEIAGEEGIECYSIVTTT, PL, EEL, GGR, SIWGL, SPTL, EQVAL, NVDSDF, QK, MSK, IK, STNL, IPPVPS, MEIDL,  
 TPQL, PK, EL, YGGNGGSYHAWSPSQL, PML, GQGNIGASK, AL, HTNGF, AL, PR, YSDSSK, VAYVL, QGSGVAGIVL, PESEK, VVAIK, K, GDAL, AL, PF,  
 GVVTTWWYNK, EDEL, VVL, GDTSK, AHK, AGQF, TDF, TGSNGIF, TGF, STEF, VGR, AWDL, EESDVK, TL, VGK, QSGQGIVQL, EGNISL, PEPK, QEHR,  
 DGMAL, NCEEAPL, DVDIK, GGGR, VVVL, NTK, NL, PL, VGEVGL, GADL, VR, DGSAMCSPGF, SCDSAL, QVTYIVR, GSGR, VQVVGVDGR, VL,  
 ETTIQAGNL, IVPR, VVSK, IADPEGMEWF, SIITPNPIF, THL, AGSSSVWK, AL, SPTVL, QAAF, NVDSGVEK, SK, TNDVAF, F, PPPK, MEL, DL, TPK,  
 TAEAF, EGDGGGYTWSTSQMPIL, AK, TNVSAGHL, VL, HSYGF, SL, PHYADSSK, VGYVIQGTGVDVGMIL, PNF, EK, EVVF, QGDIIPVPL, GTTSWWF,  
 NNGDSDL, IIVF, GETSK, AL, IPGQF, TYF, IL, AGTQGL, IGGF, STEL, TK, VYGL, NNDEVK, TK, SQSGVSIK, EK, GQL, MPK, PK, MDMTK, VYNIDAF,  
 SNNGVK, DGGL, VTTL, TQK, DF, PF, IGDVGL, SVIR, VK, EPNAIK, APSYPVNPTVQL, IYITR, GSGK, IEIVDF, NGK, VL, DTHVK, AGYL, VVPQF,  
 VVAEAGEEGMDSYSIL, TTTEPL, EEL, AGK, ASVWGL, SPTIQVVL, NVDSF, QHL, ISK, IK, ETTNL, IPPTN, MEIDL, TPQL, PK, EL,  
 YGGNGGSYHAWSPSQL, PML, GQGNIGASK, AL, HTNGF, AL, PR, YSDSSK, VAYVL, QGSGVAGIVL, PESEK, VVAIK, GDAL, AL, PF,  
 GVVTTWWYNQEDTEL, VVL, GDTSK, AHK, AGEF, TDF, TGSNGIF, TGF, STEF, VGR, AWDL, EGDVK, TL, VGK, QSGQGIVQL, EGNISL, PEPK, QEHR,  
 DGMAL, NCEEAPL, DVDIK, GGGR, VVVL, NTK, NL, PL, VGEVGL, GADL, VR, DGSAMCSPGF, SCDSAL, QVTYIVR, GSGR, VQVVGVDGR, VL, ETTIK,  
 AGNL, IVPR, VVSK, IADPEGMEWF, SIITPNPIF, THL, AGSSSVWK, AL, SPTVL, QAAF, NVDSGVEQL, SK, TNDVAF, PPPK, MGL, DL, TPK, TAEAMF,  
 EGDGGGYTWSTSQMPIL, AK, TNVSAGHL, VL, HPGF, AF, PHYADSSK, VGYVIQGTGVDVGMIL, PNSGK, EVVL, QGDIIPVPL, GTISWWF,  
 NNGDSDL, IIAF, GETSK, AL, IPGQF, TYF, IL, AGTQGL, IGGF, STEL, TK, VYGL, NNDEVK, TK, SQSGVL, IIK, EK, GQHMPK, PEIDMTK, VYNIDAF,  
 SNNGIK, DGGL, VTTL, TQK, DF, PF, IGDVGL, SVIR, VK, EPNAIK, APSYPVNPTVQL, IYIAR, GSGK, MEIVDF, TGK, VL, DTHVK, AGYL, VVPQF,

---

|                    |                                                                                                                                                                                                                                                                                                                                                                                                                                                                                                                                                                                                                                                                                                                                                                                                                                                                                                                                                                                                                                                                                                                                                                                                                                                                                                                                                                                                                                                                                                                                                                                                                                                                                                                                                                                                                                                                                                                                                                                                                                                                             |
|--------------------|-----------------------------------------------------------------------------------------------------------------------------------------------------------------------------------------------------------------------------------------------------------------------------------------------------------------------------------------------------------------------------------------------------------------------------------------------------------------------------------------------------------------------------------------------------------------------------------------------------------------------------------------------------------------------------------------------------------------------------------------------------------------------------------------------------------------------------------------------------------------------------------------------------------------------------------------------------------------------------------------------------------------------------------------------------------------------------------------------------------------------------------------------------------------------------------------------------------------------------------------------------------------------------------------------------------------------------------------------------------------------------------------------------------------------------------------------------------------------------------------------------------------------------------------------------------------------------------------------------------------------------------------------------------------------------------------------------------------------------------------------------------------------------------------------------------------------------------------------------------------------------------------------------------------------------------------------------------------------------------------------------------------------------------------------------------------------------|
|                    | <p>VVAEIAAGEEGMDSYSIL, TTTK, PL, EEL, AGK, ASVWGVL, SPTVQQVAL, NVDSEF, QNL, ISK, IK, ETTNL, IPPTN, MEIDL, TPQL, SK, YGGNGGSYHAWSPSEL, PML, R, QGNIGASK, AL, HK, NGF, AL, PR, YSDSSK, VAYVL, QGSGVAGIVL, PESEK, VVAIK, GDAL, AL, PF, GVVTTWWYNK, EDEL, VVL, GDTSK, AHK, AGEF, TDF, TGSNGIF, TGF, STEF, VGR, AWDL, EESDVK, TL, VGK, QSGQGIVQL, EGNISL, PEPK, QEHR, DGMAL, NCEEAPL, DVDIK, GGGR, VVVL, NTK, NL, PL, VGEVGL, GADL, VR, DGSAMCSPGF, SCDSAL, QVTYIVR, GSGR, VQVVGVDGR, VL, ETTIK, AGNL, IVPR, VVSK, IADPEGMEWF, SIITTPNPIF, THL, AGSSSVWK, AL, SPTVL, QAAF, NVDSGVEQL, SK, TNDVAF, PPPK, MEIDL, TPQL, SK, VYGDNGGSYYAWSPSEL, PML, EGNIGAAK, AL, EK, NGF, AL, PR, YSDSSK, VAYVL, QGSGVAGIVL, PESEK, VVAIK, GDAL, AL, PF, GVVTTWWYNK, EDEL, VIL, GDTSK, GHK, AGEF, TDF, TGSNGIF, TGF, STEF, VGR, AWDL, EEK, DVK, TL, VEK, QTGK, GIVK, L, DSGIK, PEPK, EEHR, GMAL, NCEEAPL, DVDIK, NGGR, VVVL, NTK, NL, PL, VGEVGL, GADL, VR, IDGNAMCSPGF, SCDSAL, QVTYIVR, GSGR, VQVVGADGR, VL, ETTIK, AGNL, IVPR, VVSK, IADPDGMAWF, SIITTPNPIF, THL, AGSISAWK, AL, SPTVL, QASF, NVDEGVEK, SK, TSDAIF, PPPN</p>                                                                                                                                                                                                                                                                                                                                                                                                                                                                                                                                                                                                                                                                                                                                                                                                                                                                                                                                                                     |
| Impossible<br>meat | <p>MGK, PF, TL, SL, SSL, CL, SSACF, AITSSK, NECQL, NNL, NAL, EPDHR, VESEGL, IETWNSQHPEL, QCAGVTVSK, TL, NR, NGSHL, PSYL, PYPQMIIVVQGK, GAIGF, AF, PGCPETF, EK, PQQQSSR, GSR, SQQQL, QDSHQK, IR, HF, NEGDL, VIPL, GVPYWTYNTGDEPVVAISPL, DTSNF, NNQL, DQNP, VF, YL, AGNPDIHPETMQQQQQK, SHGGR, QGQHR, QEEEEGGSVL, SGF, SK, HF, AQSF, NTNEDTAEK, SPDDER, QIVTVEGGL, SVISPK, WQEQEDEDEDEEYGR, TPSYPPR, PSHGK, HEDDEDEDEEDQPR, PDHPPQR, PSR, PEQQEPR, GR, GCQTR, NGVEENICTMK, HENIAR, PSR, ADF, YNPK, AGR, ISTL, NSL, TL, PAL, QF, GL, SAQYVVL, YR, NGIYSPDWNL, NANSVTMTR, GK, GR, VR, VVNCQGNVAF, DGEL, GQL, VVPQNPAVAEQGGEQGL, EYVVF, THHNAVSSYK, DVF, VIPSEVL, SNSYNL, GQSQVR, QL, YQGNISPL, VNP, MAK, VF, SL, CF, SGCCF, AF, SSR, EQPQQNECQIQK, NAL, PDNR, IESEGL, IETWNPNNK, PF, QCAGVAL, SR, CTL, NR, NAL, PSYTNGPQEIYIQGK, GIF, GMIYPGCPSTF, EEPQQPQQR, GQSSR, PQDR, HQK, IYNF, EDDL, IAVPTGVAWWMYNNEDTPVAVSIIDTNSL, ENQL, DQMPR, YL, AGNQEQEF, YQEQGGHQSQK, GK, HQEEEEEGGSIL, SGF, TL, EF, EHA, SVDK, QIAK, NL, QGENEGEDK, GAIVTVK, GGL, SVIK, PPTDEQQQR, PQEEEEEEDEK, PQCK, GK, DK, HCQR, PR, GSQSK, SR, NGIDETICTMR, HNIGQTSSPDIYNPQAGSVTTATSL, DF, PAL, SWL, SAEF, GSL, NAMF, VPHYNL, NANSIYAL, NGR, AL, IQVVNCNGER, VF, DGEL, QEGR, VL, IVPQNF, VVAAR, SQSDNF, EYVSF, TNDTPMIGTL, AGANSL, NAL, PEEVIQHTF, NL, SQQAR, QIK, NNNPF, VPPQESQK, AVA, MAK, VL, SL, CF, SGCF, AL, EQAQQNECQIQK, NAL, K, PDNR, IESEGF, IETWNPNNK, PF, QCAGVAL, SR, CTL, NR, NAL, PSYTNGPQEIYIQGNGIF, GMIF, PGCPSTYQEPQESQQR, GR, SQR, PQDR, HQK, VHR, EDDL, IAVPTGVAWWMYNNEDTPVAVSIIDTNSL, ENQL, DQMPR, YL, AGNQEQEF, YQQQQQGSQSQK, GK, QEEEEEGSNIL, SGF, APEF, EAF, GVNMQIVR, NL, QGENEEEDSGAIVTVK, GGL, VTAPAMR, PQQEEDDDDEEQPQCVETDK, GCQR, QSK, SR, NGIDETICTMR, QNIGQNSSPDIYNPQAGSITTATSL, DF, PAL, WL, SAQYGS, NAME, VPHYTL, NANSIYAL, NGR, AL, VQVVNCNGER, VF, DGEL, QEGGVL, IVPQNF, AVAAK, SQSDNF, EYVSF, TND, PSIGNL, AGANSL, NAL, PEEVIQHTF, NL, SQQAR, QVK, NNNPF, SF, VPPQESQR, AVA, MAK, VL, SL, CF, SGCCF, AF, SF, EQPQQNECQIQR, NAL, PDNR, IESEGF, IETWNPNNK, PF, QCAGVAL,</p> |

---

SR, CTL, NR, NAL, PSYTNAPQEIIYQQGSGIF, GMIF, PGCPSTF, EEPQQK, QGSSR, PQDR, HQK, IYHF, R, EGD, IAVPTGF, AYWMYNNEDTPVAVSL, IDTNSF, QNQL, DQMPR, YL, AGNQEQEF, QYQPQK, QQGGTQSQK, GK, QEEEEENEGGSIL, SGF, APEF, L, EHAF, VVDR, QIVR, QGENEEEEK, GAIVTVK, GGL, SVISPTTEEQQQR, PEEEEK, PDCDEK, DK, HCQSQR, NGIDETICTMR, HNIGQTSSPDIF, NPQAGSITTATSL, DF, PAL, SWL, SAQF, GSL, NAMF, VPHYNL, NANSIYAL, NGR, AL, VQVVNCNGER, VF, DGEL, QEQQVL, IVPQNF, AVAAR, SQSDNF, EYVSF, TND, PSIGNL, AGANSL, NAL, PEEVIQQT, NL, QQAR, QVK, NNNPF, SF, VPPK, ESQR, VVA, MGK, PF, TL, SL, SSL, CL, SSACF, AISSSK, NECQL, NNL, NAL, EPDHR, VESEGL, IQTWNSQHPEL, CAGVTVSK, TL, NR, NGL, HL, PSYSPYPR, MIIAQGK, GAL, GVAIPGCPETF, EEPQEQSNR, GSR, SQK, QQL, QDSHQK, IR, HF, NEGDL, VIPPGVPYWTYNTGDEPVVAISL, DTSNF, NNQL, DQTPR, VF, YL, AGNPDIETMPPMPPPPPP, SHGGR, QGQHQQEEEEEGGSVL, SGF, SK, HF, AQSF, NTNEDIAEK, QSPDDR, QIVTVEGGL, SVISPK, WQEQQDEDEDEDEDEDEDEQIPSHPPR, PSHGK, EQDEDEDEDEDK, PR, PSR, PSQK, EQDQDQDEDEDEDEDEQPR, SR, EWR, SK, TQPR, PR, QEEPR, ER, GCETR, NGVEENICTL, HENIAR, PSR, ADF, YNPK, AGR, ISTL, NSL, TL, PAL, QF, QL, SAQYVVL, YK, NGIYSPHWNL, NANSVIYVTR, GQK, VR, VVNCQGNV, DGEL, GQL, VVPQNF, VVAEQAGEQGF, EYIVF, THHNAVTSYL, DVF, AIPSEVL, AHSYNL, QSQVSEL, YEGNWGPL, VNPESQQGSPR, VK, VA, MMR, VR, PL, VL, GTVF, ASVCVSL, VR, EDENNP, YL, SSNSF, QTL, ENQNGR, IR, QR, NK, SPQL, ENL, DYR, IVQF, QSK, PNTL, PHHADADF, VL, SGR, AIL, TL, VNND, DSYNL, HPGDAQ, IPAGTTYL, VNPHDHQNL, IIK, AIPVKN, PGR, YDDF, SSTQAQQSYL, QGF, SHNL, ETSF, HSEF, EEINR, VL, GEEEEEQR, QQEGVIVEL, SK, EQIR, QL, SR, AK, SSSR, TISSEDPF, NL, SR, NPIYSNNF, GK, EITPEK, NPQL, DL, DIF, SSV DINEGAL, PHF, NSK, AIVIL, VINEGDANIEL, VGIK, EQQK, QK, QEEEEPL, EVQR, YR, AEL, SEDDV, VIPAAYPF, VVNATSNL, NF, AF, GINAENNQR, NF, AGEK, DNVVR, QIER, QVQEL, AF, PGSAQDVER, QR, ESYF, VDAQPPQK, EEGSK, GR, GPF, PSIL, GAL, MMR, AR, PL, GVVF, ASVSVSF, GIAYWEK, QNP SHNK, CL, SCNSEK, DSYR, NQACHAR, CNL, VEEEECEEGQIPR, PR, PQHPER, ER, QQHGEK, EEDEGEQPR, PF, PF, PR, QPHQEEEEQK, EEHEWHR, EEK, HGGK, GSEEEQDER, EHPR, PHQPHQK, EEEK, HEWQHK, QEK, HQGK, EEEEEEDQDEDEEQDK, ESQESGESQR, EPR, HK, NK, NPF, HF, NSK, QTL, NQYGHVR, VL, QR, NK, SQQL, QNL, DYR, IL, EF, NSK, PNTL, PHHADADYL, IVIL, NGTAIL, TL, VNND, DSYNL, QSGDAL, VPAGTTYVVNPDNDENL, MITL, AIPVKN, PGR, ESF, SSTQAQQSYL, QGF, SK, NIL, EASYDTK, EEINK, VL, GR, EEGQQGEER, QESVIVEISK, QIR, EL, SK, HAK, SSSR, TISSEDK, PF, NL, SR, DPIYSNK, GK, EITPEK, NPQL, DL, DVF, SVVDMNEGAL, PHF, NSK, AIVVL, VINEGEANIEL, VGIK, EQQQR, QQQEEQPL, EVR, YR, AEL, SEQDIF, VIPAGYPVVVNATSDL, NF, AF, GINAENNQR, NF, AGSK, DNVISQIPSQVQEL, AF, PGS AK, DIENL, IK, SQSESYF, VDAQPPQK, EEGNK, GR, GPL, SSIL, AF, MMR, AR, PL, GL, VF, ASVSVSF, GIAYWEK, ENPK, HNK, CL, QSCNSER, DSYR, NQACHAR, CNL, VEK, EEEEGEIPR, PR, PQHPER, EPQPG EK, EEDEDEQPR, PIPF, PQPR, QEEEEQR, EEQEWPR, EEK, GEK, GSEEEDEDEEQDER, QF, PF, PPHQK, EER, QEEDEDEEQQR, ESESESEL, HK, NK, NPF, GSNR, ETL, NQYGR, IR, VL, QR, NQR, SPQL, QNL, DYR, IL, EF, NSK, PNTL, PNHADADYL, IVIL, NGTAIL, SL, VNND, DSYR, QSGDAL, VPSGTTYVVNPDNNENL, ITL, AIPVKN, PGR, ESF, SSTE AQSYL, QGF, SR, NIL, EASYDTK, F, EEINK, VL, SR, EEGQQGEQR, QESVIVEISK, EQIR, AL, SK, AK, SSSR, TISSEDK, PF,

---



---

NL, SR, DPIYSNK, GK, EITPEK, NPQL, DL, DIF, SIVDMNEGAL, PHF, NSK, AIVIL, VINEGDANIEL, VGL, EQQQEQQQEEQPL, EVR, YR, AEL, SEQDIF,  
 VIPAGYPVVVNATSNL, NF, AIGINAENNQR, NF, AGSQDNVISQIPSVQEL, AF, PGSAQAVEK, NQR, ESYF, VDAQPK, EEGNK, GR, GPL, SSIL, AF,  
 MMR, AR, PL, GL, VF, ASVSVSF, GIAYWEK, ENPK, HNK, CL, QSCNSER, DSYR, NQACHAR, CNL, VEK, EEC EEGEIPR, PR, PQHPER, EPQQPG EK,  
 EEDEDEQPR, PIPF, PQPR, QEEEHEQR, EEQEWPR, EEK, GEK, GSEEEDEDEDEEQDER, QF, PF, PPHQK, EER, QEEDEDEEQQR, ESESEDSSEL, HK, NK,  
 NPF, GSNR, ETL, NQYGR, IR, VL, QR, NQR, SPQL, QNL, DYR, IL, EF, NSK, PNTL, PNHADADYL, IVIL, NGTAIL, SL, VNND DR, DSYR, QSGDAL,  
 VPSGTTYVVVNP DNENL, ITL, AIPV NK, PGR, ESF, SSTE AQSYL, QGF, SR, NIL, EASYDTK, EEINK, VL, SR, EEGQQQGEQR, QESVIVEISK, EQIR, AL,  
 SK, AK, SSSR, TISSEDK, PF, NL, SR, DPIYSNK, GK, EITPEK, NPQL, DL, DIF, SIVDMNEGAL, PHF, NSK, AIVIL, VINEGDANIEL, VGL,  
 EQQQEQQQEEQPL, EVR, YR, AEL, SEQDIF, VIPAGYPVVVNATSNL, NF, AIGINAENNQR, NF, AGSQDNVISQIPSVQEL, AF, PGSAQAVEK, NQR,  
 ESYF, VDAQPK, EEGNK, GR, GPL, SSIL, AF, MMR, VR, PL, VL, GTVF, ASVCVSL, VR, EDENNP F, YL, SSNSF, QTL, ENQNGR, IR, QR, NK, SPQL, ENL,  
 DYR, IVQF, QSK, PNTIL, PHHADADF, VL, SGR, AIL, TL, VNND DR, DSYNL, HPGDAQR, IPAGTTYL, VNPHDHQNL, IIK, AIPV NK, PGR, YDDF,  
 SSTQAQSYL, QGF, SHNIL, ETSF, HSEF, EEINR, VL, GEEEEEQR, QQEGVIVEL, SK, EQIR, QL, SR, AK, SSSR, TISSEDEPF, NL, SR, NPIYSNNF, GK,  
 EITPEK, NPQL, DL, DIF, SSV DINEGAL, PHF, NSK, AIVIL, VINEGDANIEL, VGIK, EQQK, QK, QEEEPL, EVQR, YR, AEL, SEDDV F, VIPAAYPF,  
 VVNATSNL, NF, AF, GINAENNQR, NF, AGEK, DNVVR, QIER, QVQEL, AF, PGSAQDVER, QR, ESYF, VDAQPQK, EEGSK, GR, GPF, PSIL, GAL

---

Table S2. Potential bioactive peptides in BPP.

| Peptide sequence       | MW      | PeptideRanker score <sup>a</sup> | CPPpred score <sup>b</sup> | Parent proteoin | Potential bioactive peptides <sup>d</sup>                                 | Biological function <sup>d</sup>                                                                                        |
|------------------------|---------|----------------------------------|----------------------------|-----------------|---------------------------------------------------------------------------|-------------------------------------------------------------------------------------------------------------------------|
| WGKVEADVAGH            | 1168.27 | 0.22                             | 0.17                       | Myoglobin       | AG, GH, GK, WG, EA, VE, GKV, WG, VA, AD, KV                               | ACE inhibitor, antioxidant, $\alpha$ -glucosidase inhibitor, DPP-IV inhibitor                                           |
| NAWGKVEADVAGHGQ<br>EVL | 1880.05 | 0.22                             | 0.20                       | Myoglobin       | AW, AG, GH, GQ, GK, WG, HG, EA, EV, VE, GKV, GHG, VL, VA, AD, KV, NA, QE, | ACE inhibitor, antioxidant, neuropeptide, glucose uptake stimulation, $\alpha$ -glucosidase inhibitor, DPP-IV inhibitor |
| FTGHPETLEKFDK          | 1548.72 | 0.23                             | 0.14                       | Myoglobin       | GH, TG, KF, EK, HP, FDK, LEK, ET, TL, PE                                  | ACE inhibitor, $\alpha$ -glucosidase inhibitor, DPP-IV inhibitor                                                        |
| LEFISDAIIHV            | 1256.46 | 0.22                             | 0.06                       | Myoglobin       | DA, AI, LEF, EF, II, HV, IH                                               | ACE inhibitor, glucose uptake stimulation, hypolipidemic, DPP-IV inhibitor                                              |
| LEFISDAIIH             | 1157.33 | 0.24                             | 0.05                       | Myoglobin       | DA, AI, LEF, EF, II, IH                                                   | ACE inhibitor, glucose uptake stimulation, hypolipidemic, DPP-IV inhibitor                                              |

<sup>a</sup>From PeptideRanker. <sup>b</sup>From CPPpred. <sup>c</sup>From ExPASy ProtParam. <sup>d</sup>From BIOPEP.

Table S3. Potential bioactive peptides in ByPP-pea protein.

| Peptide sequence         | MW      | PeptideRanker<br>score <sup>a</sup> | CPPpred<br>score <sup>b</sup> | Parent<br>protein | Potential bioactive peptides <sup>d</sup>                                   | Biological function <sup>d</sup>                                                                                                                                                                              |
|--------------------------|---------|-------------------------------------|-------------------------------|-------------------|-----------------------------------------------------------------------------|---------------------------------------------------------------------------------------------------------------------------------------------------------------------------------------------------------------|
| IESEGGLIETWNPNNKQ        | 1929.07 | 0.34                                | 0.10                          | Legumin           | GL, GG, EG, NK, IE, LI, SE, TW, NP, WN, ES, ET,<br>NN, PN                   | ACE inhibitor, antioxidant, stimulating vasoactive substance release,<br>glucose uptake stimulation, DPP-IV inhibitor                                                                                         |
| SEGGLIETWNPNNK           | 1558.67 | 0.54                                | 0.12                          | Legumin           | GL, GG, EG, NK, IE, LI, SE, TW, NP, WN, ET, NN,<br>PN                       | ACE inhibitor, antioxidant, stimulating vasoactive substance release,<br>glucose uptake stimulation, DPP-IV inhibitor                                                                                         |
| NAMFVPHYNLNANSIYY        | 1981.26 | 0.36                                | 0.08                          | Legumin           | IY, MF, HY, VP, LN, PH, FVP, YN, IYY, YNL, II,<br>PHY, FVPH, HY, NA, NL, SI | ACE inhibitor, antioxidant, antiinflammation, glucose uptake<br>stimulation, DPP-IV inhibitor                                                                                                                 |
| SSNNQLDQMPR              | 1289.39 | 0.43                                | 0.12                          | Legumin           | PR, MP, DQ, NN, NQ, QL                                                      | ACE inhibitor, DPP-IV inhibitor                                                                                                                                                                               |
| DFLEDAFNVNRH             | 1476.57 | 0.44                                | 0.10                          | Legumin           | AF, DA, DF, FL, FN, NR, NV, RH, VN                                          | ACE inhibitor, DPP-IV inhibitor                                                                                                                                                                               |
| IESEGGLIETWNPNNK         | 1800.94 | 0.42                                | 0.09                          | Legumin           | GL, GG, EG, NK, IE, LI, SE, TW, NP, WN, ES, ET,<br>NN, PN                   | ACE inhibitor, antioxidant, stimulating vasoactive substance release,<br>glucose uptake stimulation, DPP-IV inhibitor                                                                                         |
| RLNIGPSSSPDIYNPE         | 1758.91 | 0.28                                | 0.07                          | Legumin           | GP, RL, IY, IG, LN, YN, SSS, NP, PS, PE                                     | ACE inhibitor, antioxidant, antiamnestic, antithrombotic, stimulating<br>vasoactive substance release, regulating the stomach mucosal<br>membrane activity, $\alpha$ -glucosidase inhibitor, DPP-IV inhibitor |
| SLSDRFSYVAFKTNDR<br>AGIA | 2218.45 | 0.24                                | 0.23                          | Legumin           | RF, IA, AF, RA, GI, AG, SY, VAF, YVA, YV, DR,<br>SL, KT, ND, TN, YV         | ACE inhibitor, DPP-IV inhibitor                                                                                                                                                                               |
| LRLNIGPSSSPDIYNPEA<br>GR | 2156.38 | 0.23                                | 0.11                          | Legumin           | GP, RL, IY, IG, AG, GR, EA, LN, YN, LR, SSS, NP,<br>PS, PE                  | ACE inhibitor, antioxidant, antiamnestic, antithrombotic, stimulating<br>vasoactive substance release, regulating the stomach mucosal<br>membrane activity, DPP-IV inhibitor                                  |
| NLNANSIYYALKGR           | 1546.79 | 0.25                                | 0.18                          | Legumin           | IY, YA, GR, KG, LN, IYY, II, LK, AL, LN, NA, NL,<br>SI                      | ACE inhibitor, antioxidant, glucose uptake stimulation, DPP-IV<br>inhibitor                                                                                                                                   |
| SEGGLIETWNPNNKQ          | 1686.80 | 0.44                                | 0.12                          | Legumin           | GL, GG, EG, NK, IE, LI, SE, TW, NP, WN, ES, ET,<br>NN, PN                   | ACE inhibitor, stimulating vasoactive substance release, glucose<br>uptake stimulation, DPP-IV inhibitor                                                                                                      |

|                          |         |      |      |         |                                                                      |                                                                                                                                                                                                        |
|--------------------------|---------|------|------|---------|----------------------------------------------------------------------|--------------------------------------------------------------------------------------------------------------------------------------------------------------------------------------------------------|
| DFLEDAFNVR               | 1339.43 | 0.41 | 0.11 | Legumin | AF, DA, DF, FL, FN, NR, NV, VN                                       | ACE inhibitor, DPP-IV inhibitor                                                                                                                                                                        |
| VKGGLSIISPPEKQAR         | 1679.98 | 0.28 | 0.18 | Legumin | VK, GL, KG, GG, AR, PP, EK, II, SP, QA, SI, PE                       | ACE inhibitor, glucose uptake stimulation, $\alpha$ -glucosidase inhibitor, DPP-IV inhibitor                                                                                                           |
| LRLNIGPSSSPDI            | 1368.55 | 0.21 | 0.09 | Legumin | GP, RL, IG, LN, LR, SSS, SP, LN, PS                                  | ACE inhibitor, antiamnesic, antithrombotic, stimulating vasoactive substance release, regulating the stomach mucosal membrane activity, DPP-IV inhibitor                                               |
| NALEPDNRIESEGL           | 1613.70 | 0.26 | 0.10 | Legumin | GL, GG, EG, IE, ALEP, SE, EP, AL, DN, ES, NA, NR, RI                 | ACE inhibitor, stimulating vasoactive substance release, DPP-IV inhibitor                                                                                                                              |
| LNIGPSSSPDIYNPEAGR       | 1887.04 | 0.24 | 0.07 | Legumin | GP, IY, IG, AG, GR, EA, LN, SSS, NP, LN, PS, YN, EA, PE              | ACE inhibitor, antioxidant, antiamnesic, antithrombotic, stimulating vasoactive substance release, regulating the stomach mucosal membrane activity, $\alpha$ -glucosidase inhibitor, DPP-IV inhibitor |
| SLSDRFSYVAFK             | 1419.60 | 0.56 | 0.12 | Legumin | RF, AF, SY, VAF, YVA, YV, DR, SL, VA                                 | ACE inhibitor, DPP-IV inhibitor                                                                                                                                                                        |
| LAGTSSVINNLPLDVVA<br>ATF | 2002.30 | 0.20 | 0.18 | Legumin | VAA, PL, LA, AA, AG, GT, TF, LPL, LP, VV, AT, IN, NL, NN, SV, TS, VI | ACE inhibitor, antioxidant, hypotensive, DPP-IV inhibitor                                                                                                                                              |
| WLKLSAEHGSLH             | 1377.57 | 0.32 | 0.17 | Legumin | LKL, GS, HG, KL, WL, SL, LH, LK, SAEHGSLH, AE, EH                    | ACE inhibitor, antioxidant, DPP-IV inhibitor                                                                                                                                                           |
| LAGNHEQEFLR              | 1313.44 | 0.40 | 0.16 | Legumin | LA, AG, LR, EF, FL, HE, NH, QE                                       | ACE inhibitor, hypolipidemic, DPP-IV inhibitor                                                                                                                                                         |
| WLKLSAEHGSLHK            | 1505.74 | 0.36 | 0.24 | Legumin | LKL, GS, HG, KL, HK, WL, SL, LH, LHK, LK, SAEHGSLH, AE, EH           | ACE inhibitor, antioxidant, DPP-IV inhibitor                                                                                                                                                           |
| LNALEPDNR                | 1041.13 | 0.22 | 0.23 | Legumin | LN, ALEP, EP, AL, DN, LN, NA, NR                                     | ACE inhibitor, DPP-IV inhibitor                                                                                                                                                                        |
| TVTSLDLPVLRW             | 1399.65 | 0.26 | 0.52 | Legumin | LRW, DLP, RW, LR, LP, VL, SL, PV, TS, TV, VL, VT                     | ACE inhibitor, antioxidant, glucose uptake stimulation, DPP-IV inhibitor                                                                                                                               |
| VKGGLSIISPPEKQ           | 1452.71 | 0.21 | 0.11 | Legumin | VK, GL, KG, GG, PP, EK, II, SP, SI, VK, PE                           | ACE inhibitor, glucose uptake stimulation, $\alpha$ -glucosidase inhibitor, DPP-IV inhibitor                                                                                                           |

|                          |         |      |      |         |                                                            |                                                                                                                                                                                                         |
|--------------------------|---------|------|------|---------|------------------------------------------------------------|---------------------------------------------------------------------------------------------------------------------------------------------------------------------------------------------------------|
| RLNIGPSSSPDIYNPEAG       | 1887.04 | 0.22 | 0.07 | Legumin | GP, IG, AG, RL IY, EA, LN, YN, SSS, SP, NP, PS, PE         | ACE inhibitor, antioxidant, antiamnestic, antithrombotic, stimulating vasoactive substance release, regulating the stomach mucosal membrane activity, $\alpha$ -glucosidase inhibitor, DPP-IV inhibitor |
| IESEGGLIETWNPNNKQ<br>FR  | 2232.44 | 0.58 | 0.11 | Legumin | FR, GL, GG, EG, NK, IE, LI, SE, TW, NP, WN, ES, ET, NN, PN | ACE inhibitor, antioxidant, stimulating vasoactive substance release, glucose uptake stimulation, DPP-IV inhibitor                                                                                      |
| KGGLSIISPPE              | 1097.28 | 0.23 | 0.07 | Legumin | GL, KG, GG, PP, II, SP, SI, PE                             | ACE inhibitor, glucose uptake stimulation, $\alpha$ -glucosidase inhibitor, DPP-IV inhibitor                                                                                                            |
| KGGLSIISPPEK             | 1225.45 | 0.29 | 0.09 | Legumin | GL, KG, GG, PP, EK, II, SP, SI, PE                         | ACE inhibitor, glucose uptake stimulation, $\alpha$ -glucosidase inhibitor, DPP-IV inhibitor                                                                                                            |
| LNIGPSSSPDIYNPEAGR<br>IK | 2128.37 | 0.24 | 0.18 | Legumin | GP, IY, IG, AG, GR, EA, LN, YN, SSS, NP, LN, PS, PE        | ACE inhibitor, antioxidant, antiamnestic, antithrombotic, stimulating vasoactive substance release, regulating the stomach mucosal membrane activity, $\alpha$ -glucosidase inhibitor, DPP-IV inhibitor |
| GGLSIISPPEK              | 1097.28 | 0.36 | 0.07 | Legumin | GL, GG, PP, EK, II, SP, SI, PE                             | ACE inhibitor, glucose uptake stimulation, $\alpha$ -glucosidase inhibitor, DPP-IV inhibitor                                                                                                            |
| RDFLEDAFNVN              | 1339.43 | 0.22 | 0.11 | Legumin | AF, DA, DF, FL, FN, NV, VN                                 | ACE inhibitor, DPP-IV inhibitor                                                                                                                                                                         |
| FREGDIIAVPT              | 1217.39 | 0.20 | 0.09 | Legumin | AVP, IA, VP, FR, GD, EG, PT, AV, II, VP, PT                | ACE inhibitor, glucose uptake stimulation, DPP-IV inhibitor                                                                                                                                             |
| IETWNPNNK                | 1115.21 | 0.28 | 0.16 | Legumin | NK, IE, TW, NP, WN, ET, NN, PN                             | ACE inhibitor, antioxidant, DPP-IV inhibitor                                                                                                                                                            |
| IESEGGLIETWNPNN          | 1672.77 | 0.32 | 0.07 | Legumin | GL, GG, EG, IE, LI, SE, TW, NP, WN, ES, ET, NN, PN         | ACE inhibitor, antioxidant, stimulating vasoactive substance release, glucose uptake stimulation, DPP-IV inhibitor                                                                                      |
| NIGPSSSPDIYNPEAGR        | 1773.88 | 0.26 | 0.06 | Legumin | GP, IY, IG, AG, GR, EA, YN, SSS, SP, NP, PS, PE            | ACE inhibitor, antioxidant, antiamnestic, antithrombotic, stimulating vasoactive substance release, regulating the stomach mucosal membrane activity, $\alpha$ -glucosidase inhibitor, DPP-IV inhibitor |
| VKGGLSIISPPEKQA          | 1523.79 | 0.20 | 0.12 | Legumin | VK, GL, KG, GG, PP, EK, II, SP, QA, SI, VK, PE             | ACE inhibitor, glucose uptake stimulation, $\alpha$ -glucosidase inhibitor, DPP-IV inhibitor                                                                                                            |

|                         |         |      |      |         |                                                              |                                                                                                                                                                                                        |
|-------------------------|---------|------|------|---------|--------------------------------------------------------------|--------------------------------------------------------------------------------------------------------------------------------------------------------------------------------------------------------|
| LRLNIGPSSSPDIYNPE       | 1872.06 | 0.27 | 0.08 | Legumin | GP, RL, IY, IG, LN, YN, LR, SSS, NP, PS, PE                  | ACE inhibitor, antioxidant, antiamnesic, antithrombotic, stimulating vasoactive substance release, regulating the stomach mucosal membrane activity, $\alpha$ -glucosidase inhibitor, DPP-IV inhibitor |
| SLSDRFSYVAF             | 1291.43 | 0.64 | 0.08 | Legumin | RF, AF, SY, VAF, YVA, YV, DR, SL, VA                         | ACE inhibitor, DPP-IV inhibitor                                                                                                                                                                        |
| LNALEPDNRISEGL          | 1726.86 | 0.26 | 0.11 | Legumin | GL, GG, EG, IE, LN, ALEP, SE, EP, AL, GL, DN, ES, NA, NR, RI | ACE inhibitor, stimulating vasoactive substance release, DPP-IV inhibitor                                                                                                                              |
| FREGDIIAVPTGIVF         | 1633.91 | 0.45 | 0.08 | Legumin | AVP, VF, IA, VP, FR, GI, GD, TG, EG, PT, IVF, AV, IV, II     | ACE inhibitor, glucose uptake stimulation, DPP-IV inhibitor                                                                                                                                            |
| KRDFLEDAFNVN            | 1467.60 | 0.26 | 0.15 | Legumin | AF, KR, DA, DF, FL, FN, NV, VN                               | ACE inhibitor, DPP-IV inhibitor                                                                                                                                                                        |
| YSNAPQEIFIQQGNG         | 1665.78 | 0.29 | 0.06 | Legumin | AP, IF, QG, NG, EI, PQ, AP, EI, IQ, NA, QE, QQ, YS           | ACE inhibitor, DPP-IV inhibitor                                                                                                                                                                        |
| FREGDIIAVPTGIV          | 1486.73 | 0.28 | 0.09 | Legumin | AVP, IA, VP, FR, GI, GD, TG, EG, PT, IVF, AV, IV, II         | ACE inhibitor, glucose uptake stimulation, regulating the stomach mucosal membrane activity, DPP-IV inhibitor                                                                                          |
| LRLNIGPSSSPDIYNPEA<br>G | 2000.20 | 0.22 | 0.08 | Legumin | GP, RL, IY, IG, AG, EA, LN, YN, LR, SSS, SP, NP, PS, PE      | ACE inhibitor, antioxidant, antiamnesic, antithrombotic, stimulating vasoactive substance release, regulating the stomach mucosal membrane activity, $\alpha$ -glucosidase inhibitor, DPP-IV inhibitor |
| SIISPPEKQ               | 998.14  | 0.22 | 0.06 | Legumin | PP, EK, II, SP, SI                                           | ACE inhibitor, glucose uptake stimulation, $\alpha$ -glucosidase inhibitor, DPP-IV inhibitor                                                                                                           |
| SNNQLDQMPR              | 1202.31 | 0.44 | 0.15 | Legumin | PR, MP, DQ, NN, NQ, QL                                       | ACE inhibitor, DPP-IV inhibitor                                                                                                                                                                        |
| SVINNLPLD               | 984.12  | 0.34 | 0.10 | Legumin | PL, LPL, LP, IN, NL, NN, SV, VI                              | ACE inhibitor, antioxidant, DPP-IV inhibitor                                                                                                                                                           |
| YSNAPQEIFIQQGNGY        | 1828.96 | 0.28 | 0.06 | Legumin | GY, AP, IF, QG, NG, EI, PQ, IQ, NA, NG, QE, QQ, YS           | ACE inhibitor, DPP-IV inhibitor                                                                                                                                                                        |
| LNIGPSSSPDIYNPEAG       | 1730.85 | 0.22 | 0.06 | Legumin | GP, IY, IG, AG, EA, LN, YN, SSS, SP, NP, PS, PE              | ACE inhibitor, antioxidant, antiamnesic, antithrombotic, stimulating vasoactive substance release, regulating the stomach mucosal membrane activity, $\alpha$ -glucosidase inhibitor, DPP-IV inhibitor |

|                  |         |      |      |         |                                                           |                                                                                                                                                           |
|------------------|---------|------|------|---------|-----------------------------------------------------------|-----------------------------------------------------------------------------------------------------------------------------------------------------------|
| NLNANSIIYALKG    | 1390.60 | 0.27 | 0.12 | Legumin | IY, YA, KG, LN, IY, II, AL, NA, NL, SI                    | ACE inhibitor, antioxidant, glucose uptake stimulation, DPP-IV inhibitor                                                                                  |
| NNLPLDVVAATFNLQR | 1785.03 | 0.40 | 0.34 | Legumin | VAA, PL, AA, LQ, TF, LPL, LP, NLQ, VA, VV, AT, FN, NL, NN | ACE inhibitor, antioxidant, antiinflammation, hypotensive, DPP-IV inhibitor                                                                               |
| FKRDFLEDAF       | 1287.44 | 0.52 | 0.12 | Legumin | AF, KR, DA, DF, FKR, FL                                   | ACE inhibitor, DPP-IV inhibitor                                                                                                                           |
| PSSSPDIYNPEAGRI  | 1602.72 | 0.51 | 0.06 | Legumin | IY, AG, GR, EA, YN, SSS, SP, NP, PS, RI, PE               | ACE inhibitor, antioxidant, stimulating vasoactive substance release, $\alpha$ -glucosidase inhibitor, DPP-IV inhibitor                                   |
| VKGGLSIISPPEK    | 1324.58 | 0.21 | 0.11 | Legumin | VK, GL, KG, GG, PP, EK, II, SP, SI, PE                    | ACE inhibitor, glucose uptake stimulation, $\alpha$ -glucosidase inhibitor, DPP-IV inhibitor                                                              |
| IKTVTSLDLPVLRW   | 1640.99 | 0.23 | 0.46 | Legumin | LRW, DLP, RW, LR, LP, VL, SL, PV, TS, TV, VL, VT          | ACE inhibitor, antioxidant, glucose uptake stimulation, DPP-IV inhibitor                                                                                  |
| SEGGLIETWNPNN    | 1430.49 | 0.43 | 0.09 | Legumin | GL, GG, EG, IE, LI, SE, TW, NP, WN, ET, NN, PN            | ACE inhibitor, antioxidant, stimulating vasoactive substance release, glucose uptake stimulation, DPP-IV inhibitor                                        |
| IRSSNNQLDQMPR    | 1558.73 | 0.22 | 0.16 | Legumin | IR, PR, MP, DQ, NN, NQ, QL                                | ACE inhibitor, antioxidant, DPP-IV inhibitor                                                                                                              |
| FDGELEAGRA       | 1064.12 | 0.37 | 0.12 | Legumin | RA, AG, GR, GE, EA, DG, EL                                | ACE inhibitor, antioxidant, $\alpha$ -glucosidase inhibitor, DPP-IV inhibitor                                                                             |
| RLNIGPSSSPDI     | 1255.39 | 0.21 | 0.07 | Legumin | GP, RL, IG, LN, SSS, SP, PS                               | ACE inhibitor, antiamnestic, antithrombotic, stimulating vasoactive substance release, regulating the stomach mucosal membrane activity, DPP-IV inhibitor |
| SSNNQLDQM        | 1036.08 | 0.39 | 0.07 | Legumin | DQ, NN, NQ, QL                                            | DPP-IV inhibitor                                                                                                                                          |
| GNTVFDGELEAGR    | 1364.43 | 0.21 | 0.13 | Legumin | VF, AG, GR, GE, EA, DG, EL, NT, TV                        | ACE inhibitor, antioxidant, $\alpha$ -glucosidase inhibitor, DPP-IV inhibitor                                                                             |
| SSNNQLDQMP       | 1133.20 | 0.41 | 0.08 | Legumin | MP, DQ, NN, NQ, QL                                        | DPP-IV inhibitor                                                                                                                                          |
| DFLEDAFNVNRHIVD  | 1803.95 | 0.22 | 0.09 | Legumin | AF, DA, DF, IV, RHI, FL, FN, HI, NR, NV, RH, VD, VN       | ACE inhibitor, antioxidant, glucose uptake stimulation, DPP-IV inhibitor                                                                                  |
| GGLSIISPPE       | 969.10  | 0.31 | 0.05 | Legumin | GL, GG, PP, II, SP, SI, PE                                | ACE inhibitor, glucose uptake stimulation, $\alpha$ -glucosidase inhibitor, DPP-IV inhibitor                                                              |
| LAGTSSVINNLPL    | 1298.50 | 0.24 | 0.14 | Legumin | PL, LA, AG, GT, LPL, LP, IN, NL, NN, SV, TS, VI           | ACE inhibitor, antioxidant, DPP-IV inhibitor                                                                                                              |

|                  |         |      |      |                      |                                                         |                                                                                                                                                                                                         |
|------------------|---------|------|------|----------------------|---------------------------------------------------------|---------------------------------------------------------------------------------------------------------------------------------------------------------------------------------------------------------|
| GGLSIISPPEKQ     | 1225.41 | 0.32 | 0.07 | Legumin              | GL, GG, PP, EK, II, SP, SI, PE                          | ACE inhibitor, glucose uptake stimulation, $\alpha$ -glucosidase inhibitor, DPP-IV inhibitor                                                                                                            |
| SLSDRFS          | 810.86  | 0.47 | 0.08 | Legumin              | RF, DR, SL                                              | ACE inhibitor, DPP-IV inhibitor                                                                                                                                                                         |
| VINNPLD          | 897.04  | 0.25 | 0.13 | Legumin              | PL, LPL, LP, IN, NL, NN, VI                             | ACE inhibitor, antioxidant, DPP-IV inhibitor                                                                                                                                                            |
| SIISPPEK         | 870.01  | 0.29 | 0.06 | Legumin              | PP, EK, II, SP, SI, PE                                  | ACE inhibitor, glucose uptake stimulation, $\alpha$ -glucosidase inhibitor, DPP-IV inhibitor                                                                                                            |
| NQLDQMPR         | 1001.13 | 0.47 | 0.24 | Legumin/<br>Glycinin | PR, MP, DQ, NQ, QL                                      | ACE inhibitor, DPP-IV inhibitor                                                                                                                                                                         |
| NIGPSSSPDIYNPEAG | 1617.69 | 0.24 | 0.05 | Legumin              | GP, IY, IG, AG, EA, LN, YN, SSS, SP, NP, PS, PE         | ACE inhibitor, antioxidant, antiamnestic, antithrombotic, stimulating vasoactive substance release, regulating the stomach mucosal membrane activity, $\alpha$ -glucosidase inhibitor, DPP-IV inhibitor |
| GGLSIISPPEKQAR   | 1452.67 | 0.42 | 0.12 | Legumin              | GL, GG, AR, PP, EK, II, SP, QA, SI, PE                  | ACE inhibitor, glucose uptake stimulation, $\alpha$ -glucosidase inhibitor, DPP-IV inhibitor                                                                                                            |
| NAMFVPHYNLN      | 1319.50 | 0.47 | 0.10 | Legumin/<br>Glycinin | MF, HY, VP, LN, PH, FVP, YN, YNL, NA, NL                | ACE inhibitor, antioxidant, antiinflammation, DPP-IV inhibitor                                                                                                                                          |
| LNIGPSSSPDIYNPE  | 1602.72 | 0.27 | 0.05 | Legumin              | GP, IY, IG, LN, YN, SSS, SP, NP, PS, PE                 | ACE inhibitor, antioxidant, antiamnestic, antithrombotic, stimulating vasoactive substance release, regulating the stomach mucosal membrane activity, $\alpha$ -glucosidase inhibitor, DPP-IV inhibitor |
| NAMFVPH          | 814.96  | 0.62 | 0.08 | Legumin/<br>Glycinin | MF, VP, PH, FVP, FVPH, NA                               | ACE inhibitor, antioxidant, DPP-IV inhibitor                                                                                                                                                            |
| NIGPSSSPDIYNPE   | 1489.56 | 0.30 | 0.05 | Legumin              | GP, IY, IG, YN, SSS, SP, NP, PS, PE                     | ACE inhibitor, antioxidant, antiamnestic, antithrombotic, stimulating vasoactive substance release, regulating the stomach mucosal membrane activity, $\alpha$ -glucosidase inhibitor, DPP-IV inhibitor |
| NAMFVPHYNLNANSII | 1818.08 | 0.33 | 0.08 | Legumin              | MF, HY, VP, LN, PH, FVP, YN, YNL, PHY, FVPH, NA, NL, SI | ACE inhibitor, antioxidant, antiinflammation, glucose uptake stimulation, DPP-IV inhibitor                                                                                                              |
| SLSDRFSYVAFKTND  | 1749.90 | 0.22 | 0.11 | Legumin              | RF, AF, SY, VAF, YVA, YV, DR, SL, KT, ND, TN            | ACE inhibitor, DPP-IV inhibitor                                                                                                                                                                         |



|                          |         |      |      |                      |                                                                        |                                                                                                                                                                                                              |
|--------------------------|---------|------|------|----------------------|------------------------------------------------------------------------|--------------------------------------------------------------------------------------------------------------------------------------------------------------------------------------------------------------|
| NAMFVPHYNLNAN            | 1504.68 | 0.35 | 0.11 | Legumin/<br>Glycinin | MF, HY, VP, LN, PH, FVP, YN, YNL, PHY, FVPH,<br>NA, NL                 | ACE inhibitor, antioxidant, antiinflammation, DPP-IV inhibitor                                                                                                                                               |
| DFLEDAFNVRHIVDR          | 1960.14 | 0.26 | 0.13 | Legumin              | AF, DA, DF, DR, IV, RHI, FL, FN, HI, NR, NV,<br>RH, VD, VN             | ACE inhibitor, antioxidant, glucose uptake stimulation, DPP-IV<br>inhibitor                                                                                                                                  |
| IISPPE                   | 654.76  | 0.29 | 0.05 | Legumin              | PP, II, SP, PE                                                         | ACE inhibitor, glucose uptake stimulation, $\alpha$ -glucosidase inhibitor,<br>DPP-IV inhibitor                                                                                                              |
| DFLEDAFNVRHIVDR<br>LQG   | 2258.48 | 0.21 | 0.14 | Legumin              | RL, AF, DA, QG, LQ, DF, DR, IV, RHI, FL, FN, HI,<br>NR, NV, RH, VD, VN | ACE inhibitor, antioxidant, glucose uptake stimulation, DPP-IV<br>inhibitor                                                                                                                                  |
| SIISPPE                  | 741.84  | 0.33 | 0.04 | Legumin              | PP, II, SP, SI, PE                                                     | ACE inhibitor, glucose uptake stimulation, $\alpha$ -glucosidase inhibitor,<br>DPP-IV inhibitor                                                                                                              |
| ALEPDNRIESEGL            | 1499.60 | 0.31 | 0.10 | Legumin              | GL, GG, EG, IE, ALEP, SE, EP, AL, DN, ES, NR,<br>RI                    | ACE inhibitor, stimulating vasoactive substance release, DPP-IV<br>inhibitor                                                                                                                                 |
| NNLPLDVVAATFNLQR<br>NEAR | 2255.52 | 0.24 | 0.41 | Legumin              | VAA, PL, AA, EA, AR, LQ, TF, LPL, LP, NLQ,<br>VA, VV, AT, FN, NL, NN   | ACE inhibitor, antioxidant, antiinflammation, hypotensive, $\alpha$ -<br>glucosidase inhibitor, DPP-IV inhibitor                                                                                             |
| AGTSSVINNLPL             | 1185.34 | 0.30 | 0.12 | Legumin              | PL, AG, GT, LPL, LP, IN, NL, NN, SV, TS, VI                            | ACE inhibitor, antioxidant, DPP-IV inhibitor                                                                                                                                                                 |
| DFLEDAFNVN               | 1183.24 | 0.28 | 0.07 | Legumin              | AF, DA, DF, FL, FN, NV, VN                                             | ACE inhibitor, DPP-IV inhibitor                                                                                                                                                                              |
| INNPL                    | 682.82  | 0.56 | 0.16 | Legumin              | PL, LPL, LP, IN, NL, NN                                                | ACE inhibitor, antioxidant, DPP-IV inhibitor                                                                                                                                                                 |
| KFLVPA                   | 673.85  | 0.42 | 0.32 | Legumin              | VP, KF, LV, PA, FL                                                     | ACE inhibitor, glucose uptake stimulation, DPP-IV inhibitor                                                                                                                                                  |
| PQEIFIQQNGYFGMV          | 1828.07 | 0.76 | 0.06 | Legumin              | GY, IF, GM, FG, QG, NG, EI, PQ, IQ, MV, NG, QE,<br>QQ, YF              | ACE inhibitor, DPP-IV inhibitor                                                                                                                                                                              |
| LNIGPSSSPDIYNPEA         | 1673.80 | 0.25 | 0.06 | Legumin              | GP, IY, IG, EA, LN, YN, SSS, SP, NP, PS, PE                            | ACE inhibitor, antioxidant, antiamnesic, antithrombotic, stimulating<br>vasoactive substance release, regulating the stomach mucosal<br>membrane activity, $\alpha$ -glucosidase inhibitor, DPP-IV inhibitor |
| GGLSIISPPEKQA            | 1296.49 | 0.31 | 0.08 | Legumin              | GL, GG, PP, EK, II, QA, SI, PE                                         | ACE inhibitor, glucose uptake stimulation, $\alpha$ -glucosidase inhibitor,<br>DPP-IV inhibitor                                                                                                              |
| RLAGTSSVINNLPL           | 1454.69 | 0.25 | 0.22 | Legumin              | RL, PL, LA, AG, GT, LPL, LP, IN, NL, NN, TS, VI                        | ACE inhibitor, antioxidant, DPP-IV inhibitor                                                                                                                                                                 |

|                         |         |      |      |                        |                                                              |                                                                                                                    |
|-------------------------|---------|------|------|------------------------|--------------------------------------------------------------|--------------------------------------------------------------------------------------------------------------------|
| SVINNLP                 | 869.03  | 0.51 | 0.13 | Legumin                | PL, LPL, LP, IN, NL, NN, SV, VI                              | ACE inhibitor, antioxidant, DPP-IV inhibitor                                                                       |
| NANSIYALKGR             | 1319.53 | 0.31 | 0.16 | Legumin                | IY, YA, GR, KG, IY, II, LK, AL, NA, SI                       | ACE inhibitor, antioxidant, glucose uptake stimulation, DPP-IV inhibitor                                           |
| KNAMFVPHYNLNA           | 1518.75 | 0.39 | 0.15 | Legumin/<br>Glycinin   | MF, HY, VP, LN, PH, FVP, YN, YNL, PHY, FVPH, NA, NL          | ACE inhibitor, antioxidant, antiinflammation, DPP-IV inhibitor                                                     |
| SNAPQEIFIQQNGYF         | 1812.96 | 0.56 | 0.06 | Legumin                | GY, AP, IF, QG, NG, EI, PQ, EI, IQ, NA, QE, QQ, YF           | ACE inhibitor, DPP-IV inhibitor                                                                                    |
| QEQENEGNNIFSGF          | 1612.63 | 0.46 | 0.05 | Legumin                | GF, IF, SG, EG, NE, NN, QE                                   | ACE inhibitor, DPP-IV inhibitor                                                                                    |
| AGTSSVINNLPLDVVAA<br>TF | 1889.14 | 0.23 | 0.16 | Legumin                | VAA, PL, AA, AG, GT, TF, LPL, LP, AT, IN, NL, NN, SV, TS, VI | ACE inhibitor, antioxidant, hypotensive, DPP-IV inhibitor                                                          |
| IESEGGLIETWNP           | 1444.56 | 0.28 | 0.07 | Legumin                | GL, GG, EG, IE, LI, SE, TW, NP, WN, ES, ET, LI               | ACE inhibitor, antioxidant, stimulating vasoactive substance release, glucose uptake stimulation, DPP-IV inhibitor |
| FVPHYNLNAN              | 1188.31 | 0.45 | 0.10 | Legumin/<br>Glycinin   | HY, VP, LN, PH, FVP, YN, YNL, PHY, FVPH, NA, NL              | ACE inhibitor, antioxidant, antiinflammation, DPP-IV inhibitor                                                     |
| DALEPDNRIESEGGL         | 1614.69 | 0.29 | 0.09 | Legumin                | GL, DA, GG, EG, IE, ALEP, SE, EP, AL, DN, ES, NR, RI         | ACE inhibitor, stimulating vasoactive substance release, DPP-IV inhibitor                                          |
| LDALEPDNR               | 1042.11 | 0.25 | 0.18 | Legumin                | DA, ALEP, EP, AL, DN, NR                                     | ACE inhibitor, DPP-IV inhibitor                                                                                    |
| LDALEPDNRIESEGGL        | 1727.85 | 0.27 | 0.10 | Legumin                | GL, DA, GG, EG, IE, ALEP, SE, EP, AL, DN, ES, NR, RI         | ACE inhibitor, stimulating vasoactive substance release, DPP-IV inhibitor                                          |
| NQQLQDLDFVNSVDIK        | 1989.21 | 0.31 | 0.11 | Vicilin/Pr<br>ovicilin | IF, LQ, NQ, QD, QL, QQ, SV, VD, VN                           | ACE inhibitor, DPP-IV inhibitor                                                                                    |
| IKEGSLLLPNYNSR          | 1603.84 | 0.31 | 0.15 | Vicilin                | LLP, GS, EG, NY, KE, YN, LP, LLL, LL, SL, PN                 | ACE inhibitor, stimulating vasoactive substance release, glucose uptake stimulation, DPP-IV inhibitor              |
| GFGINAENNER             | 1220.26 | 0.21 | 0.09 | Vicilin                | GF, GI, FG, ER, AE, IN, NA, NE, NN                           | ACE inhibitor, DPP-IV inhibitor                                                                                    |
| SGTQNQPSLLSGFSK         | 1550.69 | 0.40 | 0.11 | Vicilin                | GF, GT, SG, TQ, QP, LL, SL, NQ, PS, QN, SK                   | ACE inhibitor, glucose uptake stimulation, DPP-IV inhibitor                                                        |

|                         |         |      |      |                    |                                                                    |                                                                                                                                                                        |
|-------------------------|---------|------|------|--------------------|--------------------------------------------------------------------|------------------------------------------------------------------------------------------------------------------------------------------------------------------------|
| AKLSPGDVFPAGHPV         | 1704.00 | 0.48 | 0.13 | Vicilin/Provicilin | PG, VF, IPA, LSP, IP, AG, GH, GD, KL, HP, PA, IP, SP, PV, VI       | ACE inhibitor, antiamnestic, antithrombotic, regulating the stomach mucosal membrane activity, DPP-IV inhibitor                                                        |
| IKEGSLLLPNYNS           | 1447.65 | 0.21 | 0.10 | Vicilin            | LLP, GS, EG, NY, KE, YN, LP, LLL, LL, SL, PN                       | ACE inhibitor, stimulating vasoactive substance release, glucose uptake stimulation, DPP-IV inhibitor                                                                  |
| FANAQPLQRE              | 1173.29 | 0.36 | 0.23 | Vicilin            | PL, LQ, QP, FA, NA, FA                                             | ACE inhibitor, DPP-IV inhibitor                                                                                                                                        |
| RSDQENPFIFK             | 1380.52 | 0.52 | 0.09 | Vicilin/Provicilin | IF, NP, DQ, PF, QE, PF                                             | ACE inhibitor, DPP-IV inhibitor                                                                                                                                        |
| NKPGQLQSFLSGTQN<br>QPSL | 2157.41 | 0.55 | 0.20 | Vicilin            | PG, GQ, GT, SG, SF, NK, KP, LQ, TQ, QP, LL, SL, NQ, PS, QL, QN, QS | ACE inhibitor, antioxidant, antiamnestic, neuropeptide, antithrombotic, glucose uptake stimulation, regulating the stomach mucosal membrane activity, DPP-IV inhibitor |
| GFGINAENNERN            | 1334.37 | 0.23 | 0.09 | Vicilin            | GF, GI, FG, ER, AE, IN, NA, NE, NN, RN                             | ACE inhibitor, DPP-IV inhibitor                                                                                                                                        |
| SRNPIYSNKFG             | 1282.42 | 0.59 | 0.09 | Vicilin/Provicilin | IY, FG, KF, NK, NP, PI, RN, YS                                     | ACE inhibitor, antioxidant, DPP-IV inhibitor                                                                                                                           |
| LLSGTQNQPSLLSGFSK       | 1777.01 | 0.28 | 0.17 | Vicilin            | GF, GT, SG, TQ, QP, LL, SL, NQ, PS, QN, SK                         | ACE inhibitor, glucose uptake stimulation, DPP-IV inhibitor                                                                                                            |
| EGKGFELVGQ              | 1178.26 | 0.27 | 0.09 | Vicilin/Provicilin | VG, KG, GQ, GK, GD, EG, DF, LV, EL                                 | ACE inhibitor, antioxidant, neuropeptide, glucose uptake stimulation, DPP-IV inhibitor                                                                                 |
| FFEITPEKNQQL            | 1493.68 | 0.23 | 0.09 | Vicilin/Provicilin | EI, EK, TP, FF, QL, QQ, PE                                         | ACE inhibitor, $\alpha$ -glucosidase inhibitor, DPP-IV inhibitor                                                                                                       |
| LAFPGSSHEVDR            | 1314.42 | 0.31 | 0.10 | Vicilin/Provicilin | PG, FP, AFP, AF, LA, GS, EV, DR, LAF, HE, SH, VD                   | ACE inhibitor, antioxidant, antiamnestic, antithrombotic, regulating the stomach mucosal membrane activity, DPP-IV inhibitor                                           |
| NQQLQDLDFVN             | 1446.58 | 0.34 | 0.11 | Vicilin/Provicilin | IF, LQ, NQ, QD, QL, QQ, VN                                         | ACE inhibitor, DPP-IV inhibitor                                                                                                                                        |
| RSDQENPFIF              | 1252.35 | 0.65 | 0.07 | Vicilin/Provicilin | IF, NP, DQ, PF, QE                                                 | ACE inhibitor, DPP-IV inhibitor                                                                                                                                        |
| IGFGINAENNERN           | 1447.53 | 0.20 | 0.08 | Vicilin            | GF, IG, GI, FG, ER, AE, IN, NA, NN, NE, RN                         | ACE inhibitor, DPP-IV inhibitor                                                                                                                                        |

|                      |         |      |      |                    |                                                               |                                                                                                                                            |
|----------------------|---------|------|------|--------------------|---------------------------------------------------------------|--------------------------------------------------------------------------------------------------------------------------------------------|
| NQQLQDLDFVNSV        | 1632.79 | 0.25 | 0.10 | Vicilin/Provicilin | IF, LQ, NQ, QD, QL, QQ, SV, VN                                | ACE inhibitor, DPP-IV inhibitor                                                                                                            |
| EGSLLLPNYNSR         | 1362.51 | 0.33 | 0.14 | Vicilin            | LLP, GS, EG, NY, YN, LP, LLL, LL, SL, PN                      | ACE inhibitor, stimulating vasoactive substance release, glucose uptake stimulation, DPP-IV inhibitor                                      |
| LAFPGSSHEVDRL        | 1427.58 | 0.49 | 0.12 | Vicilin            | PG, RL, FP, AFP, AF, LA, GS, EV, DR, LAF, HE, SH, VD          | ACE inhibitor, antioxidant, antiamnestic, antithrombotic, regulating the stomach mucosal membrane activity, DPP-IV inhibitor               |
| IPVNKPGQLQ           | 1093.29 | 0.21 | 0.21 | Vicilin/Provicilin | PG, IP, GQ, NK, KP, LQ, KP, IP, PV, QL, VN                    | ACE inhibitor, antioxidant, antiamnestic, neuropeptide, antithrombotic, regulating the stomach mucosal membrane activity, DPP-IV inhibitor |
| GDAIKLPAGTI          | 1055.24 | 0.52 | 0.13 | Vicilin            | AG, DA, GT, AI, GD, KL, KLP, LP, IKL, PA, TI                  | ACE inhibitor, antioxidant, DPP-IV inhibitor                                                                                               |
| LSGTQNQPSLLSGFSK     | 1663.85 | 0.31 | 0.13 | Vicilin            | GF, GT, SG, TQ, QP, LL, SL, NQ, PS, QN, SK                    | ACE inhibitor, glucose uptake stimulation, DPP-IV inhibitor                                                                                |
| SKIFENLQ             | 978.11  | 0.22 | 0.09 | Vicilin/Provicilin | IF, LQ, NLQ, KI, NL, SK                                       | ACE inhibitor, antiinflammation, DPP-IV inhibitor                                                                                          |
| DLAIPVNKPGQLQ        | 1392.62 | 0.29 | 0.20 | Vicilin/Provicilin | PG, AIP, IP, LA, GQ, AI, NK, KP, LQ, PV, QL, VN               | ACE inhibitor, antioxidant, antiamnestic, neuropeptide, antithrombotic, regulating the stomach mucosal membrane activity, DPP-IV inhibitor |
| EGSLLLPNYNS          | 1206.32 | 0.22 | 0.09 | Vicilin            | LLP, GS, EG, NY, YN, LP, LLL, LL, SL, PN                      | ACE inhibitor, stimulating vasoactive substance release, glucose uptake stimulation, DPP-IV inhibitor                                      |
| SKIFENLQNYR          | 1411.58 | 0.29 | 0.12 | Vicilin/Provicilin | IF, NY, LQ, IFENLQN, YR, NLQ, KI, NL, QN, SK                  | ACE inhibitor, antiinflammation, neuropeptide, DPP-IV inhibitor                                                                            |
| FVNSVDIKEGSLLLPNYNSR | 2265.55 | 0.47 | 0.12 | Vicilin            | LLP, GS, EG, NY, KE, YN, LP, LLL, LL, SL, PN, SV, VD, VN      | ACE inhibitor, stimulating vasoactive substance release, glucose uptake stimulation, DPP-IV inhibitor                                      |
| NLERGDAIKLPAGTI      | 1567.81 | 0.20 | 0.20 | Vicilin            | AG, DA, GT, AI, GD, KL, RG, KLP, ER, LP, RGD, IKL, PA, NL, TI | ACE inhibitor, antioxidant, antithrombotic, DPP-IV inhibitor                                                                               |
| EGSLLLPNYN           | 1119.24 | 0.36 | 0.11 | Vicilin            | LLP, GS, EG, NY, YN, LP, LLL, LL, SL                          | ACE inhibitor, stimulating vasoactive substance release, glucose uptake stimulation, DPP-IV inhibitor                                      |

|                  |         |      |      |                    |                                                     |                                                                                                                                                                        |
|------------------|---------|------|------|--------------------|-----------------------------------------------------|------------------------------------------------------------------------------------------------------------------------------------------------------------------------|
| LAIPVNKPGQ       | 1036.24 | 0.26 | 0.22 | Vicilin/Provicilin | PG, AIP, IP, LA, GQ, AI, NK, KP, LQ, PV, QL, VN     | ACE inhibitor, antioxidant, antiamnestic, neuropeptide, antithrombotic, regulating the stomach mucosal membrane activity, DPP-IV inhibitor                             |
| VLDLAIPVNKPGQL   | 1476.78 | 0.41 | 0.25 | Vicilin/Provicilin | PG, AIP, IP, LA, GQ, AI, NK, KP, LQ, PV, QL, VN     | ACE inhibitor, antioxidant, antiamnestic, neuropeptide, antithrombotic, glucose uptake stimulation, regulating the stomach mucosal membrane activity, DPP-IV inhibitor |
| FVIPAGHPVAINA    | 1305.54 | 0.39 | 0.09 | Vicilin/Provicilin | IPA, IP, AG, GH, AI, HP, VA, PA, GH, IN, NA, PV, VI | ACE inhibitor, DPP-IV inhibitor                                                                                                                                        |
| LAIPVNKPGQLQ     | 1277.53 | 0.25 | 0.26 | Vicilin/Provicilin | PG, AIP, IP, LA, GQ, AI, NK, KP, LQ, PV, QL, VN     | ACE inhibitor, antioxidant, antiamnestic, neuropeptide, antithrombotic, regulating the stomach mucosal membrane activity, DPP-IV inhibitor                             |
| YENENGHIRL       | 1244.33 | 0.22 | 0.09 | Vicilin/Provicilin | RL, IR, HIRL, HIR, GH, NG, YE, NEN, HI, NE          | ACE inhibitor, antioxidant, neuropeptide, DPP-IV inhibitor                                                                                                             |
| FEITPEKNQQLQDLDF | 2078.31 | 0.26 | 0.09 | Vicilin/Provicilin | IF, EI, LQ, EK, TP, NQ, QD, QL, QQ, PE              | ACE inhibitor, $\alpha$ -glucosidase inhibitor, DPP-IV inhibitor                                                                                                       |
| AIPVNKPGQLQ      | 1164.37 | 0.29 | 0.23 | Vicilin/Provicilin | PG, AIP, IP, GQ, AI, NK, KP, LQ, PV, QL, VN         | ACE inhibitor, antioxidant, antiamnestic, neuropeptide, antithrombotic, regulating the stomach mucosal membrane activity, DPP-IV inhibitor                             |
| LANRDDNEDLRV     | 1429.51 | 0.21 | 0.24 | Vicilin            | LA, LR, LAN, DN, NE, NR                             | ACE inhibitor, antioxidant, DPP-IV inhibitor                                                                                                                           |
| LAFPGSSH         | 814.90  | 0.36 | 0.06 | Vicilin/Provicilin | PG, FP, AFP, AF, LA, GS, LAF, SH                    | ACE inhibitor, antioxidant, antiamnestic, antithrombotic, regulating the stomach mucosal membrane activity, DPP-IV inhibitor                                           |
| SVSSESGPFNLR     | 1279.37 | 0.38 | 0.08 | Vicilin/Provicilin | GP, SG, SGP, LR, NLR, SE, ES, FN, NL, PF, SV, GRF   | ACE inhibitor, antiamnestic, antithrombotic, stimulating vasoactive substance release, regulating the stomach mucosal membrane activity, DPP-IV inhibitor              |
| TLFLPQ           | 717.86  | 0.41 | 0.23 | Vicilin/Provicilin | LF, PQ, LP, FL, TL, LPQ                             | ACE inhibitor, DPP-IV inhibitor                                                                                                                                        |

|                          |         |      |      |                    |                                                      |                                                                                                                |
|--------------------------|---------|------|------|--------------------|------------------------------------------------------|----------------------------------------------------------------------------------------------------------------|
| RSDQENPF                 | 992.01  | 0.41 | 0.08 | Vicilin/Provicilin | NP, DQ, PF, QE                                       | DPP-IV inhibitor                                                                                               |
| FVIPAGHPV                | 936.12  | 0.37 | 0.08 | Vicilin/Provicilin | IPA, IP, AG, GH, HP, PA, PV, VI                      | ACE inhibitor, DPP-IV inhibitor                                                                                |
| FFEITPEKNQQLQDL          | 1850.06 | 0.23 | 0.11 | Vicilin/Provicilin | EI, LQ, EK, TP, FF, NQ, QD, QL, QQ, PE               | ACE inhibitor, $\alpha$ -glucosidase inhibitor, DPP-IV inhibitor                                               |
| SRSDQENPF                | 1079.09 | 0.44 | 0.07 | Vicilin/Provicilin | NP, DQ, PF, QE                                       | DPP-IV inhibitor                                                                                               |
| IFENLQNYRL               | 1309.49 | 0.51 | 0.13 | Vicilin/Provicilin | RL, IF, NY, LQ, IFENLQN, YR, NLQ, NL, QN             | ACE inhibitor, antiinflammation, neuropeptide, DPP-IV inhibitor                                                |
| VDIKEGSLLLPNYNS          | 1661.87 | 0.23 | 0.10 | Vicilin            | LLP, GS, EG, NY, KE, YN, LP, LLL, LL, SL, PN, VD     | ACE inhibitor, stimulating vasoactive substance release, glucose uptake stimulation, DPP-IV inhibitor          |
| PQYTDADFIL               | 1182.30 | 0.55 | 0.07 | Vicilin/Provicilin | DA, PQ, DF, IL, ADF, YT, AD, QY, TD                  | ACE inhibitor, antioxidant, glucose uptake stimulation, $\alpha$ -glucosidase inhibitor, DPP-IV inhibitor      |
| ANRDDNEDLRVLDLAI<br>PV   | 2038.24 | 0.27 | 0.21 | Vicilin            | AIP, IP, LA, AI, LR, VL, DN, NE, NR, PV              | ACE inhibitor, glucose uptake stimulation, DPP-IV inhibitor                                                    |
| LSPGDVFPVIPAGHPV         | 1504.75 | 0.53 | 0.09 | Vicilin/Provicilin | PG, VF, IPA, LSP, IP, AG, GH, GD, HP, PA, GH, PV, VI | ACE inhibitor, antiamnesic, antithrombotic, regulating the stomach mucosal membrane activity, DPP-IV inhibitor |
| FVIPAGHPVA               | 1007.20 | 0.35 | 0.09 | Vicilin/Provicilin | IPA, IP, AG, GH, HP, VA, PA, PV, VI                  | ACE inhibitor, DPP-IV inhibitor                                                                                |
| LANRDDNEDLRVLDLAI<br>IPV | 2151.40 | 0.22 | 0.23 | Vicilin            | AIP, IP, LA, AI, LR, VL, LAN, DN, NE, NR, PV         | ACE inhibitor, antioxidant, glucose uptake stimulation, DPP-IV inhibitor                                       |
| SKPHTLFLPQ               | 1167.37 | 0.51 | 0.18 | Vicilin/Provicilin | LF, KP, PQ, PH, LP, PHT, FL, HT, SK, TL, LPQ         | ACE inhibitor, antioxidant, DPP-IV inhibitor                                                                   |

|                |         |      |      |                               |                                              |                                                                                                                                            |
|----------------|---------|------|------|-------------------------------|----------------------------------------------|--------------------------------------------------------------------------------------------------------------------------------------------|
| LAIPVKNKPGQL   | 1149.40 | 0.45 | 0.26 | Vicilin/Provicilin            | PG, AIP, IP, LA, GQ, AI, NK, KP, PV, QL, VN  | ACE inhibitor, antioxidant, anti-amnesic, neuropeptide, antithrombotic, regulating the stomach mucosal membrane activity, DPP-IV inhibitor |
| FENLQNY        | 926.98  | 0.24 | 0.07 | Vicilin/Convicilin/Provicilin | NY, LQ, NLQ, NL, QN                          | ACE inhibitor, anti-inflammation, DPP-IV inhibitor                                                                                         |
| IFENLQNYR      | 1196.33 | 0.30 | 0.11 | Vicilin/Provicilin            | IF, NY, LQ, IFENLQN, YR, NLQ, NL, QN         | ACE inhibitor, anti-inflammation, neuropeptide, DPP-IV inhibitor                                                                           |
| DLAIPV         | 626.75  | 0.27 | 0.11 | Vicilin/Provicilin            | AIP, IP, LA, AI, PV                          | ACE inhibitor, DPP-IV inhibitor                                                                                                            |
| IKEGSLLLPN     | 1083.29 | 0.32 | 0.16 | Vicilin                       | LLP, GS, EG, KE, LP, LLL, LL, PN             | ACE inhibitor, stimulating vasoactive substance release, glucose uptake stimulation, DPP-IV inhibitor                                      |
| DLDFVNSV       | 1021.14 | 0.20 | 0.07 | Vicilin/Provicilin            | IF, SV, VN                                   | ACE inhibitor, DPP-IV inhibitor                                                                                                            |
| EGSLLLPNYNSRA  | 1433.58 | 0.36 | 0.16 | Vicilin                       | LLP, RA, GS, EG, NY, YN, LP, LLL, LL, SL, PN | ACE inhibitor, stimulating vasoactive substance release, glucose uptake stimulation, DPP-IV inhibitor                                      |
| DIKEGSLLLPNYNS | 1562.74 | 0.24 | 0.09 | Vicilin                       | LLP, GS, EG, NY, KE, YN, LP, LLL, LL, SL, PN | ACE inhibitor, stimulating vasoactive substance release, glucose uptake stimulation, DPP-IV inhibitor                                      |
| VFVIPAGHPVAI   | 1219.49 | 0.39 | 0.09 | Vicilin/Provicilin            | VF, IPA, IP, AG, GH, AI, HP, VA, PA, PV, VI  | ACE inhibitor, DPP-IV inhibitor                                                                                                            |
| IGFGINAEN      | 934.02  | 0.20 | 0.05 | Vicilin                       | GF, IG, GI, FG, AE, IN, NA                   | ACE inhibitor, DPP-IV inhibitor                                                                                                            |
| GDFELVGQ       | 863.92  | 0.28 | 0.07 | Vicilin/Provicilin            | VG, GQ, GD, DF, LV, EL                       | ACE inhibitor, antioxidant, neuropeptide, glucose uptake stimulation, DPP-IV inhibitor                                                     |
| DLDFVN         | 834.92  | 0.38 | 0.06 | Vicilin/Provicilin            | IF, VN                                       | ACE inhibitor, DPP-IV inhibitor                                                                                                            |

|                         |         |      |      |                    |                                                  |                                                                                                                                                            |
|-------------------------|---------|------|------|--------------------|--------------------------------------------------|------------------------------------------------------------------------------------------------------------------------------------------------------------|
| EGSLLLPN                | 841.96  | 0.42 | 0.15 | Vicilin            | LLP, GS, EG, LP, LLL, LL, SL, PN                 | ACE inhibitor, stimulating vasoactive substance release, glucose uptake stimulation, DPP-IV inhibitor                                                      |
| KSVSSESGPF              | 1024.10 | 0.30 | 0.06 | Vicilin/Provicilin | GP, SG, SGP, SE, ES, KS, PF, SV, VS, GPF         | ACE inhibitor, anti-amnestic, antithrombotic, stimulating vasoactive substance release, regulating the stomach mucosal membrane activity, DPP-IV inhibitor |
| GDAIKLPAGTIA            | 1126.32 | 0.48 | 0.15 | Vicilin            | IA, AG, DA, GT, AI, GD, KL, KLP, LP, IKL, PA, TI | ACE inhibitor, antioxidant, DPP-IV inhibitor                                                                                                               |
| FEITPEKNQQQLQDLDF<br>VN | 2291.54 | 0.29 | 0.10 | Vicilin/Provicilin | IF, EI, LQ, EK, TP, NQ, QD, QL, QQ, VN, PE       | ACE inhibitor, $\alpha$ -glucosidase inhibitor, DPP-IV inhibitor                                                                                           |
| YRLLE                   | 692.81  | 0.22 | 0.47 | Vicilin/Provicilin | RL, RR, YR, LL                                   | ACE inhibitor, neuropeptide, glucose uptake stimulation, DPP-IV inhibitor                                                                                  |
| DIKEGSLLLPNYNSR         | 1718.93 | 0.34 | 0.13 | Vicilin            | LLP, GS, EG, NY, KE, YN, LP, LLL, LL, SL, PN, YN | ACE inhibitor, stimulating vasoactive substance release, glucose uptake stimulation, DPP-IV inhibitor                                                      |
| RSDQENPFI               | 1105.17 | 0.42 | 0.07 | Vicilin/Provicilin | NP, DQ, PF, QE                                   | DPP-IV inhibitor                                                                                                                                           |
| IFENLQ                  | 762.86  | 0.21 | 0.07 | Vicilin/Provicilin | IF, LQ, NLQ, NL                                  | ACE inhibitor, anti-inflammation, DPP-IV inhibitor                                                                                                         |
| DLAIPVKNKPGQ            | 1151.33 | 0.29 | 0.16 | Vicilin/Provicilin | PG, AIP, IP, LA, GQ, AI, NK, KP, PV, VN          | ACE inhibitor, antioxidant, anti-amnestic, neuropeptide, antithrombotic, regulating the stomach mucosal membrane activity, DPP-IV inhibitor                |
| IKLPAGTIAY              | 1046.27 | 0.20 | 0.14 | Vicilin            | AY, IA, AG, GT, KL, IAY, KLP, LP, IKL, PA, TI    | ACE inhibitor, antioxidant, DPP-IV inhibitor                                                                                                               |
| FANAQPLQ                | 887.99  | 0.46 | 0.16 | Vicilin            | PL, LQ, QP, FA, NA                               | ACE inhibitor, DPP-IV inhibitor                                                                                                                            |
| NQQQLQDLDF              | 1233.34 | 0.36 | 0.10 | Vicilin/Provicilin | IF, LQ, NQ, QD, QL, QQ                           | ACE inhibitor, DPP-IV inhibitor                                                                                                                            |
| NQQQLQDLDFV             | 1332.48 | 0.30 | 0.12 | Vicilin/Provicilin | IF, LQ, NQ, QD, QL, QQ                           | ACE inhibitor, DPP-IV inhibitor                                                                                                                            |



|                |         |      |      |                            |                                                          |                                                                                                                                                          |
|----------------|---------|------|------|----------------------------|----------------------------------------------------------|----------------------------------------------------------------------------------------------------------------------------------------------------------|
| DIKEGSLLLPN    | 1198.38 | 0.33 | 0.12 | Vicilin                    | LLP, GS, EG, KE, LP, LLL, LL, SL, PN                     | ACE inhibitor, stimulating vasoactive substance release, glucose uptake stimulation, DPP-IV inhibitor                                                    |
| PQYTDADFI      | 1069.14 | 0.41 | 0.06 | Vicilin/Provicilin         | DA, PQ, DF, ADF, YT, AD, QY, TD                          | ACE inhibitor, antioxidant, DPP-IV inhibitor                                                                                                             |
| KEGSLLLPN      | 970.13  | 0.35 | 0.24 | Vicilin                    | LLP, GS, EG, KE, LP, LLL, LL, SL, PN                     | ACE inhibitor, stimulating vasoactive substance release, glucose uptake stimulation, DPP-IV inhibitor                                                    |
| DIKEGSLLLPNYN  | 1475.66 | 0.35 | 0.10 | Vicilin                    | LLP, GS, EG, NY, KE, YN, LP, LLL, LL, SL, PN             | ACE inhibitor, stimulating vasoactive substance release, glucose uptake stimulation, DPP-IV inhibitor                                                    |
| SKIFENLQNYRLLE | 1767.01 | 0.35 | 0.15 | Vicilin/Provicilin         | RL, IF, NY, LQ, IFENLQN, LL, YR, NLQ, LL, KI, NL, QN, SK | ACE inhibitor, antiinflammation, neuropeptide, glucose uptake stimulation, DPP-IV inhibitor                                                              |
| DLDIFVNSVDIK   | 1377.56 | 0.21 | 0.07 | Vicilin/Provicilin         | IF, SV, VD, VN                                           | ACE inhibitor, DPP-IV inhibitor                                                                                                                          |
| QSYFANAQPLQRE  | 1551.68 | 0.28 | 0.16 | Vicilin                    | PL, SY, LQ, QP, FA, NA, QS, YF                           | ACE inhibitor, DPP-IV inhibitor                                                                                                                          |
| IPVNKPGQL      | 965.16  | 0.35 | 0.21 | Vicilin/Provicilin         | PG, IP, GQ, NK, KP, PV, QL, VN                           | ACE inhibitor, antioxidant, antiamnesic, neuropeptide, antithrombotic, regulating the stomach mucosal membrane activity, DPP-IV inhibitor                |
| SVSSESGPF      | 895.92  | 0.39 | 0.04 | Legumin/Vicilin/Provicilin | GP, SGP, SE, ES, PF, SV, VS, GPF                         | ACE inhibitor, antiamnesic, antithrombotic, stimulating vasoactive substance release, regulating the stomach mucosal membrane activity, DPP-IV inhibitor |
| IKLPAGTIA      | 883.10  | 0.20 | 0.19 | Vicilin                    | IA, AG, GT, KL, KLP, LP, IKL, PA, TI                     | ACE inhibitor, antioxidant, DPP-IV inhibitor                                                                                                             |
| LPQYTDADFI     | 1182.30 | 0.40 | 0.07 | Vicilin/Provicilin         | DA, PQ, DF, LP, ADF, YT, AD, QY, TD, LPQ                 | ACE inhibitor, antioxidant, $\alpha$ -glucosidase inhibitor, DPP-IV inhibitor                                                                            |
| FFEITPEKNQQLQ  | 1621.81 | 0.20 | 0.10 | Vicilin/Provicilin         | EI, LQ, EK, TP, FF, NQ, QL, QQ, PE                       | ACE inhibitor, $\alpha$ -glucosidase inhibitor, DPP-IV inhibitor                                                                                         |
| LFLPQ          | 616.76  | 0.64 | 0.19 | Vicilin/Provicilin         | LF, PQ, LP, FL, LPQ                                      | ACE inhibitor, DPP-IV inhibitor                                                                                                                          |

|                          |         |      |      |                    |                                                                |                                                                                                                              |
|--------------------------|---------|------|------|--------------------|----------------------------------------------------------------|------------------------------------------------------------------------------------------------------------------------------|
| LAFPGSSHE                | 944.01  | 0.26 | 0.06 | Vicilin/Provicilin | PG, FP, AFP, AF, LA, GS, LAF, HE, SH                           | ACE inhibitor, antioxidant, anti-amnesic, antithrombotic, regulating the stomach mucosal membrane activity, DPP-IV inhibitor |
| GQLQSFLSGTQNQ            | 1520.66 | 0.29 | 0.15 | Vicilin/Provicilin | GQ, GT, SG, SF, LQ, TQ, LL, FL, NQ, QL, QN, QS, FL             | ACE inhibitor, neuropeptide, glucose uptake stimulation, DPP-IV inhibitor                                                    |
| LDLAIPV                  | 739.91  | 0.26 | 0.16 | Vicilin/Provicilin | AIP, IP, LA, AI, PV                                            | ACE inhibitor, DPP-IV inhibitor                                                                                              |
| FQTLYENENGHIR            | 1620.74 | 0.21 | 0.09 | Vicilin/Provicilin | IR, LY, HIR, GH, NG, FQ, YE, LY, NEN, HI, NE, QT, TL           | ACE inhibitor, antioxidant, DPP-IV inhibitor                                                                                 |
| IKLPAGT                  | 698.86  | 0.23 | 0.26 | Vicilin/Convicilin | AG, GT, KL, KLP, LP, IKL, PA                                   | ACE inhibitor, antioxidant, DPP-IV inhibitor                                                                                 |
| AIKLPAGT                 | 769.94  | 0.33 | 0.28 | Vicilin            | AG, GT, AI, KL, KLP, LP, IKL, PA                               | ACE inhibitor, antioxidant, DPP-IV inhibitor                                                                                 |
| FFEITPEKNQQLQDLDF        | 2225.48 | 0.25 | 0.08 | Vicilin/Provicilin | IF, EI, LQ, EK, TP, FF, EI, NQ, QD, QL, QQ, PE                 | ACE inhibitor, $\alpha$ -glucosidase inhibitor, DPP-IV inhibitor                                                             |
| AIVIVTVNEGKGDFELV<br>GQR | 2144.46 | 0.22 | 0.16 | Vicilin/Provicilin | VG, KG, GQ, GK, AI, GD, EG, DF, LV, IV, EL, NE, TV, VI, VN, VT | ACE inhibitor, antioxidant, neuropeptide, glucose uptake stimulation, DPP-IV inhibitor                                       |
| ASSNLDLLGFGINAENN<br>QR  | 2033.18 | 0.44 | 0.12 | Vicilin            | GF, GI, FG, LG, LL, LGF, AE, AS, IN, NA, NL, NN, NQ            | ACE inhibitor, antioxidant, glucose uptake stimulation, DPP-IV inhibitor                                                     |
| LGFGINAENNQR             | 1332.44 | 0.20 | 0.12 | Vicilin/Provicilin | GF, GI, FG, LG, LGF, AE, IN, NA, NN, NQ                        | ACE inhibitor, antioxidant, DPP-IV inhibitor                                                                                 |
| SNKFQTLFENENGHIR         | 1934.10 | 0.34 | 0.10 | Vicilin            | IR, HIR, LF, GH, NG, KF, NK, FQ, IR, NEN, HI, NE, QT, TL       | ACE inhibitor, antioxidant, DPP-IV inhibitor                                                                                 |
| GFGINAENNQR              | 1219.28 | 0.20 | 0.10 | Vicilin/Provicilin | GF, GI, FG, AE, IN, NA, NN, NQ                                 | ACE inhibitor, DPP-IV inhibitor                                                                                              |
| FFEITPEKNPQLQ            | 1590.80 | 0.28 | 0.10 | Vicilin            | EI, LQ, PQ, EK, TP, FF, NP, QL, PE                             | ACE inhibitor, $\alpha$ -glucosidase inhibitor, DPP-IV inhibitor                                                             |
| GFGINAENNQRN             | 1333.38 | 0.23 | 0.10 | Vicilin/Provicilin | GF, GI, FG, AE, IN, NA, NN, NQ, RN                             | ACE inhibitor, DPP-IV inhibitor                                                                                              |

|                     |         |      |      |                    |                                                                             |                                                                                                                                                                       |
|---------------------|---------|------|------|--------------------|-----------------------------------------------------------------------------|-----------------------------------------------------------------------------------------------------------------------------------------------------------------------|
| FQTLFENENGHIR       | 1604.74 | 0.33 | 0.09 | Vicilin            | IR, HIR, LF, GH, NG, FQ, IR, NEN, HI, NE, QT, TL                            | ACE inhibitor, antioxidant, DPP-IV inhibitor                                                                                                                          |
| EGSLLLPHYNSR        | 1385.54 | 0.40 | 0.13 | Vicilin            | HY, LLP, GS, EG, PH, YN, LP, LLL, LL, SL, LLPH, PHY                         | ACE inhibitor, antioxidant, antiinflammation, stimulating vasoactive substance release, glucose uptake stimulation, DPP-IV inhibitor                                  |
| LAFPGSAQEVDR        | 1289.41 | 0.22 | 0.15 | Vicilin            | PG, FP, AFP, AF, LA, GS, EV, DR, LAF, QE, VD                                | ACE inhibitor, antioxidant, antiamnesic, antithrombotic, regulating the stomach mucosal membrane activity, DPP-IV inhibitor                                           |
| EIKEGSLLLPHYNSR     | 1755.99 | 0.30 | 0.12 | Vicilin            | HY, LLP, GS, EG, EI, KE, PH, YN, LP, LLL, LL, SL, LLPH, PHY                 | ACE inhibitor, antioxidant, antiinflammation, stimulating vasoactive substance release, glucose uptake stimulation, DPP-IV inhibitor                                  |
| GDTIKLPAGTIA        | 1156.34 | 0.31 | 0.15 | Vicilin            | IA, AG, GT, GD, KL, KLP, LP, IKL, PA, TI                                    | ACE inhibitor, antioxidant, DPP-IV inhibitor                                                                                                                          |
| DLDIFVNSVEIK        | 1391.58 | 0.20 | 0.08 | Vicilin            | IF, EI, VE, SV, VN                                                          | ACE inhibitor, $\alpha$ -glucosidase inhibitor, DPP-IV inhibitor                                                                                                      |
| SNKFQTLFENENGHI     | 1777.91 | 0.26 | 0.08 | Vicilin            | LF, GH, NG, KF, NK, FQ, NEN, GH, HI, NE, QT, TL                             | ACE inhibitor, antioxidant, DPP-IV inhibitor                                                                                                                          |
| FEITPEKNPQLQDL      | 1671.87 | 0.21 | 0.11 | Vicilin            | EI, LQ, PQ, EK, TP, NP, QD, QL, PE                                          | ACE inhibitor, $\alpha$ -glucosidase inhibitor, DPP-IV inhibitor                                                                                                      |
| FQTLFENENGHI        | 1448.55 | 0.27 | 0.06 | Vicilin            | LF, GH, NG, FQ, NEN, HI, NE, QT, TL                                         | ACE inhibitor, antioxidant, DPP-IV inhibitor                                                                                                                          |
| VEIKEGSLLLPHYNSR    | 1855.12 | 0.29 | 0.14 | Vicilin            | HY, LLP, GS, EG, EI, VE, KE, PH, YN, LP, LLL, LL, SL, LLPH, PHY             | ACE inhibitor, antioxidant, antiinflammation, stimulating vasoactive substance release, glucose uptake stimulation, $\alpha$ -glucosidase inhibitor, DPP-IV inhibitor |
| LGFGINAENNQRN       | 1446.54 | 0.22 | 0.12 | Vicilin/Provicilin | GF, GI, FG, LG, LGF, AE, IN, NA, NN, NQ, RN                                 | ACE inhibitor, antioxidant, DPP-IV inhibitor                                                                                                                          |
| FFEITPEKNPQL        | 1462.67 | 0.34 | 0.09 | Vicilin            | EI, PQ, EK, TP, FF, NP, QL, PE                                              | ACE inhibitor, $\alpha$ -glucosidase inhibitor, DPP-IV inhibitor                                                                                                      |
| KEGSLLLP            | 993.17  | 0.41 | 0.21 | Vicilin            | LLP, GS, EG, KE, PH, LP, LLL, LL, SL, LLPH                                  | ACE inhibitor, antioxidant, stimulating vasoactive substance release, glucose uptake stimulation, DPP-IV inhibitor                                                    |
| VNSVEIKEGSLLLPHYNSR | 2155.44 | 0.48 | 0.13 | Vicilin            | HY, LLP, GS, EG, EI, VE, KE, PH, YN, LP, LLL, LL, SL, LLPH, PHY, SV, VE, VN | ACE inhibitor, antioxidant, antiinflammation, stimulating vasoactive substance release, glucose uptake stimulation, $\alpha$ -glucosidase inhibitor, DPP-IV inhibitor |
| DLAIPVNRPGQLQ       | 1420.63 | 0.33 | 0.22 | Vicilin            | PG, AIP, IP, RP, LA, GQ, AI, PV, QL, VN                                     | ACE inhibitor, antiamnesic, neuropeptide, antithrombotic, regulating the stomach mucosal membrane activity, DPP-IV inhibitor                                          |

|                      |         |      |      |                    |                                                        |                                                                                                                                                     |
|----------------------|---------|------|------|--------------------|--------------------------------------------------------|-----------------------------------------------------------------------------------------------------------------------------------------------------|
| VEIKEGSLLLPH         | 1334.58 | 0.25 | 0.13 | Vicilin            | LLP, GS, EG, EI, VE, KE, PH, LP, LLL, LL, SL, LLPH     | ACE inhibitor, stimulating vasoactive substance release, glucose uptake stimulation, $\alpha$ -glucosidase inhibitor, DPP-IV inhibitor              |
| IKEGSLLLPH           | 1106.33 | 0.35 | 0.14 | Vicilin            | LLP, GS, EG, KE, PH, LP, LLL, LL, SL, LLPH             | ACE inhibitor, stimulating vasoactive substance release, glucose uptake stimulation, DPP-IV inhibitor                                               |
| KNPQLQDL             | 955.08  | 0.30 | 0.27 | Vicilin/Provicilin | LQ, PQ, NP, QD, QL                                     | ACE inhibitor, DPP-IV inhibitor                                                                                                                     |
| SGNQNNQNYLSGFSK      | 1671.74 | 0.36 | 0.08 | Vicilin            | YL, GF, SG, NY, NQ, QN, QQ, SK                         | ACE inhibitor, neuropeptide, DPP-IV inhibitor                                                                                                       |
| SSNLDLLGFGINAENNQR   | 1962.11 | 0.46 | 0.11 | Vicilin            | GF, GI, FG, LG, LL, LGF, AE, GI, IN, NA, NL, NN, NQ    | ACE inhibitor, antioxidant, glucose uptake stimulation, DPP-IV inhibitor                                                                            |
| EITPEKNPQLQDLDFV N   | 2113.35 | 0.27 | 0.10 | Vicilin            | IF, EI, LQ, PQ, EK, TP, NP, QD, QL, VN, PE             | ACE inhibitor, $\alpha$ -glucosidase inhibitor, DPP-IV inhibitor                                                                                    |
| EGSLLPH              | 865.00  | 0.50 | 0.13 | Vicilin            | LLP, GS, EG, PH, LP, LLL, LL, SL, LLPH                 | ACE inhibitor, antioxidant, stimulating vasoactive substance release, glucose uptake stimulation, DPP-IV inhibitor                                  |
| SRGPIYSNEFGK         | 1354.49 | 0.57 | 0.08 | Vicilin            | GP, FGK, IY, FG, GK, RG, EF, NE, PI, YS, EF            | ACE inhibitor, antioxidant, hypolipidemic, anti-amnestic, antithrombotic, regulating the stomach mucosal membrane activity, DPP-IV inhibitor        |
| ASSNLDLLGFGINAENNQRN | 2147.29 | 0.49 | 0.12 | Vicilin            | GF, GI, FG, LG, LL, LGF, AE, GI, IN, NA, NL, NN, NQ    | ACE inhibitor, antioxidant, glucose uptake stimulation, DPP-IV inhibitor                                                                            |
| DLAIPVNRPGQ          | 1179.34 | 0.36 | 0.18 | Vicilin            | PG, AIP, IP, RP, LA, GQ, AI, NR, PV, VN                | ACE inhibitor, anti-amnestic, neuropeptide, antithrombotic, regulating the stomach mucosal membrane activity, DPP-IV inhibitor                      |
| SVEIKEGSLLLPH        | 1421.66 | 0.39 | 0.11 | Vicilin            | LLP, GS, EG, EI, VE, KE, PH, LP, LLL, LL, SL, LLPH, SV | ACE inhibitor, antioxidant, stimulating vasoactive substance release, glucose uptake stimulation, $\alpha$ -glucosidase inhibitor, DPP-IV inhibitor |
| GDTIKLPAGTI          | 1085.27 | 0.33 | 0.13 | Vicilin            | AG, GT, GD, KL, KLP, LP, IKL, PA, TI                   | ACE inhibitor, antioxidant, DPP-IV inhibitor                                                                                                        |
| EGSLLPHYNS           | 1229.35 | 0.28 | 0.08 | Vicilin            | HY, LLP, GS, EG, PH, YN, LP, LLL, LL, SL, LLPH, PHY    | ACE inhibitor, antioxidant, anti-inflammation, stimulating vasoactive substance release, glucose uptake stimulation, DPP-IV inhibitor               |

|                 |         |      |      |                    |                                                                 |                                                                                                                                                          |
|-----------------|---------|------|------|--------------------|-----------------------------------------------------------------|----------------------------------------------------------------------------------------------------------------------------------------------------------|
| GDTIKLPAGT      | 972.11  | 0.33 | 0.17 | Vicilin/Convicilin | AG, GT, GD, KL, KLP, LP, IKL, PA, TI                            | ACE inhibitor, antioxidant, DPP-IV inhibitor                                                                                                             |
| FFEITPEKNPQLQDL | 1819.04 | 0.30 | 0.10 | Vicilin            | EI, LQ, PQ, EK, TP, FF, NP, QD, QL, PE                          | ACE inhibitor, $\alpha$ -glucosidase inhibitor, DPP-IV inhibitor                                                                                         |
| AIPVNRPGQLQ     | 1192.38 | 0.31 | 0.26 | Vicilin            | PG, AIP, IP, RP, GQ, AI, LQ, NR, PV, QL, VN                     | ACE inhibitor, antiamnesic, neuropeptide, antithrombotic, regulating the stomach mucosal membrane activity, DPP-IV inhibitor                             |
| TIFLPQ          | 717.86  | 0.40 | 0.09 | Vicilin/Convicilin | IF, PQ, IFL, LP, FL, TI, LPQ                                    | ACE inhibitor, DPP-IV inhibitor                                                                                                                          |
| LAIPVNRPGQL     | 1177.41 | 0.49 | 0.30 | Vicilin            | PG, AIP, IP, RP, LA, GQ, AI, NR, PV, QL, VN                     | ACE inhibitor, antiamnesic, neuropeptide, antithrombotic, regulating the stomach mucosal membrane activity, DPP-IV inhibitor                             |
| EIKEGSLLLPH     | 1235.45 | 0.28 | 0.12 | Vicilin            | LLP, GS, EG, EI, KE, PH, LP, LLL, LL, SL, LLPH                  | ACE inhibitor, antioxidant, stimulating vasoactive substance release, glucose uptake stimulation, DPP-IV inhibitor                                       |
| VLDLAIPVNRPGQL  | 1504.79 | 0.43 | 0.27 | Vicilin            | PG, AIP, IP, RP, LA, GQ, AI, VL, NR, PV, QL, VN                 | ACE inhibitor, antiamnesic, neuropeptide, antithrombotic, glucose uptake stimulation, regulating the stomach mucosal membrane activity, DPP-IV inhibitor |
| LAIPVNRPGQ      | 1064.25 | 0.32 | 0.25 | Vicilin            | PG, AIP, IP, RP, LA, GQ, AI, NR, PV, VN                         | ACE inhibitor, antiamnesic, neuropeptide, antithrombotic, regulating the stomach mucosal membrane activity, DPP-IV inhibitor                             |
| KEGSLLLPHYNSRAI | 1697.95 | 0.46 | 0.15 | Vicilin            | HY, LLP, RA, GS, AI, EG, KE, PH, YN, LP, LLL, LL, SL, LLPH, PHY | ACE inhibitor, antioxidant, antiinflammation, stimulating vasoactive substance release, glucose uptake stimulation, DPP-IV inhibitor                     |
| KNPQLQDLDFV     | 1429.64 | 0.42 | 0.13 | Vicilin/Provicilin | IF, LQ, PQ, NP, QD, QL                                          | ACE inhibitor, DPP-IV inhibitor                                                                                                                          |
| DLAIPVNRPGQLQS  | 1507.71 | 0.23 | 0.18 | Vicilin            | PG, AIP, IP, RP, LA, GQ, AI, NR, PV, QL, QS, VN                 | ACE inhibitor, antiamnesic, neuropeptide, antithrombotic, regulating the stomach mucosal membrane activity, DPP-IV inhibitor                             |
| SRSDPQNP        | 1047.09 | 0.67 | 0.08 | Vicilin            | PQ, NP, DP, PF, QN                                              | ACE inhibitor, DPP-IV inhibitor                                                                                                                          |
| ELAFPGSAQEVD    | 1418.53 | 0.21 | 0.12 | Vicilin            | PG, FP, AFP, AF, LA, GS, EV, DR, EL, LAF, QE, VD                | ACE inhibitor, antioxidant, antiamnesic, antithrombotic, regulating the stomach mucosal membrane activity, DPP-IV inhibitor                              |

|                   |         |      |      |                    |                                                             |                                                                                                                                                           |
|-------------------|---------|------|------|--------------------|-------------------------------------------------------------|-----------------------------------------------------------------------------------------------------------------------------------------------------------|
| ELAFPGSAQ         | 919.00  | 0.24 | 0.09 | Vicilin            | PG, FP, AFP, AF, LA, GS, EL, LAF                            | ACE inhibitor, antioxidant, antiamnestic, antithrombotic, regulating the stomach mucosal membrane activity, DPP-IV inhibitor                              |
| GDTIKLPAG         | 871.00  | 0.38 | 0.15 | Vicilin/Convicilin | AG, GD, KL, KLP, LP, IKL, PA, TI                            | ACE inhibitor, antioxidant, DPP-IV inhibitor                                                                                                              |
| SKPHTIFLPQ        | 1167.37 | 0.50 | 0.10 | Vicilin            | IF, KP, PQ, PH, IFL, LP, PHT, HT, SK, TI, LPQ               | ACE inhibitor, antioxidant, DPP-IV inhibitor                                                                                                              |
| VLDLAIPVNRPGQLQSF | 1867.18 | 0.32 | 0.19 | Vicilin            | PG, AIP, IP, RP, LA, GQ, AI, SF, LQ, VL, NR, PV, QL, QS, VN | ACE inhibitor, antiamnestic, neuropeptide, antithrombotic, glucose uptake stimulation, regulating the stomach mucosal membrane activity, DPP-IV inhibitor |
| AIPVNRPGQLQS      | 1867.18 | 0.21 | 0.19 | Vicilin            | PG, AIP, IP, RP, GQ, AI, LQ, NR, PV, QL, QS, VN             | ACE inhibitor, antiamnestic, neuropeptide, antithrombotic, DPP-IV inhibitor                                                                               |
| LAIPVNRPGQLQ      | 1305.54 | 0.26 | 0.30 | Vicilin            | PG, AIP, IP, RP, LA, GQ, AI, PV, QL, VN                     | ACE inhibitor, antiamnestic, neuropeptide, antithrombotic, regulating the stomach mucosal membrane activity, DPP-IV inhibitor                             |
| LAFPGSAQ          | 789.89  | 0.30 | 0.11 | Vicilin            | PG, FP, AFP, AF, LA, GS, LAF                                | ACE inhibitor, antioxidant, antiamnestic, antithrombotic, regulating the stomach mucosal membrane activity, DPP-IV inhibitor                              |
| NEGKGDFELV        | 1107.19 | 0.21 | 0.09 | Vicilin/Provicilin | KG, GK, GD, EG, DF, LV, EL, NE                              | ACE inhibitor, antioxidant, glucose uptake stimulation, DPP-IV inhibitor                                                                                  |
| ASSNLDLLG         | 888.97  | 0.60 | 0.12 | Vicilin            | LG, LL, AS, NL                                              | ACE inhibitor, glucose uptake stimulation, DPP-IV inhibitor                                                                                               |
| LGFGINAEN         | 934.02  | 0.20 | 0.07 | Vicilin/Provicilin | GF, GI, FG, LG, LGF, AE, IN, NA                             | ACE inhibitor, antioxidant, DPP-IV inhibitor                                                                                                              |
| GDTIKLPAGTIAY     | 1319.52 | 0.30 | 0.13 | Vicilin            | AY, IA, AG, GT, GD, KL, IAY, KLP, LP, IKL, PA, TI           | ACE inhibitor, antioxidant, antiinflammation, antiamnestic, neuropeptide, antibacterial, DPP-IV inhibitor                                                 |
| KNPQLQDLDI        | 1183.33 | 0.22 | 0.14 | Vicilin/Provicilin | LQ, PQ, NP, QD, QL                                          | ACE inhibitor, DPP-IV inhibitor                                                                                                                           |
| KASSNLDLLG        | 1017.15 | 0.49 | 0.18 | Vicilin            | LG, KA, LL, AS, NL                                          | ACE inhibitor, glucose uptake stimulation, DPP-IV inhibitor                                                                                               |
| KNPQLQDLDFVN      | 1543.74 | 0.44 | 0.12 | Vicilin/Provicilin | IF, LQ, PQ, NP, QD, QL, VN                                  | ACE inhibitor, DPP-IV inhibitor                                                                                                                           |

|                    |         |      |      |                    |                                                       |                                                                                                                                                           |
|--------------------|---------|------|------|--------------------|-------------------------------------------------------|-----------------------------------------------------------------------------------------------------------------------------------------------------------|
| FEITPEKNPQL        | 1315.49 | 0.23 | 0.11 | Vicilin            | EI, PQ, EK, TP, NP, QL, PE                            | ACE inhibitor, $\alpha$ -glucosidase inhibitor, DPP-IV inhibitor                                                                                          |
| FENENGHIRL         | 1228.33 | 0.40 | 0.09 | Vicilin/Convicilin | RL, IR, HIRL, HIR, GH, NG, NEN, HI, NE                | ACE inhibitor, antioxidant, neuropeptide, DPP-IV inhibitor                                                                                                |
| RSDPQNPF           | 960.01  | 0.71 | 0.09 | Vicilin            | PQ, NP, DP, PF, QN                                    | ACE inhibitor, DPP-IV inhibitor                                                                                                                           |
| RVLDLAIPVNRPGQLQ   | 1789.11 | 0.20 | 0.39 | Vicilin            | PG, AIP, IP, RP, LA, GQ, AI, LQ, VL, NR, PV, QL, VN   | ACE inhibitor, anti-amnesic, neuropeptide, antithrombotic, glucose uptake stimulation, regulating the stomach mucosal membrane activity, DPP-IV inhibitor |
| GSLLLPH            | 735.88  | 0.61 | 0.19 | Vicilin            | LLP, GS, PH, LP, LLL, LL, SL, LLPH                    | ACE inhibitor, antioxidant, stimulating vasoactive substance release, glucose uptake stimulation, DPP-IV inhibitor                                        |
| LLLPH              | 591.75  | 0.41 | 0.40 | Vicilin            | LLP, PH, LP, LLL, LL, LLPH                            | ACE inhibitor, antioxidant, stimulating vasoactive substance release, glucose uptake stimulation, DPP-IV inhibitor                                        |
| SRGPIYSNEFG        | 1226.31 | 0.54 | 0.06 | Vicilin            | GP, IY, FG, RG, EF, NE, PI, YS                        | ACE inhibitor, antioxidant, hypolipidemic, anti-amnesic, antithrombotic, regulating the stomach mucosal membrane activity, DPP-IV inhibitor               |
| FFEITPEKNPQLQDLIDF | 2194.47 | 0.41 | 0.08 | Vicilin            | IF, EI, LQ, PQ, EK, TP, FF, NP, QD, QL, PE            | ACE inhibitor, $\alpha$ -glucosidase inhibitor, DPP-IV inhibitor                                                                                          |
| VNEGKGDFEL         | 1107.19 | 0.20 | 0.09 | Vicilin/Provicilin | KG, GK, GD, EG, DF, EL, NE, VN                        | ACE inhibitor, antioxidant, DPP-IV inhibitor                                                                                                              |
| DLAIPVNRPGQL       | 1292.50 | 0.55 | 0.22 | Vicilin            | PG, AIP, IP, RP, LA, GQ, AI, NR, PV, QL, VN           | ACE inhibitor, anti-amnesic, neuropeptide, antithrombotic, regulating the stomach mucosal membrane activity, DPP-IV inhibitor                             |
| DDNEELRVL          | 1102.17 | 0.21 | 0.17 | Vicilin            | LR, VR, EE, EL, DN, NE, RV                            | ACE inhibitor, antioxidant, stimulating vasoactive substance release, glucose uptake stimulation, DPP-IV inhibitor                                        |
| GDTIKLPAGTIAYL     | 1432.68 | 0.54 | 0.15 | Vicilin            | YL, AY, IA, AG, GT, GD, KL, IAY, KLP, LP, IKL, PA, TI | ACE inhibitor, antioxidant, neuropeptide, DPP-IV inhibitor                                                                                                |
| IFLPQ              | 616.76  | 0.64 | 0.08 | Vicilin/Convicilin | IF, PQ, IFL, LP, FL, LPQ                              | ACE inhibitor, DPP-IV inhibitor                                                                                                                           |

|                    |         |      |      |                    |                                                                              |                                                                                                                                                                                                 |
|--------------------|---------|------|------|--------------------|------------------------------------------------------------------------------|-------------------------------------------------------------------------------------------------------------------------------------------------------------------------------------------------|
| KNPQLQDLD          | 1070.17 | 0.20 | 0.18 | Vicilin/Provicilin | LQ, PQ, NP, QD, QL                                                           | ACE inhibitor, DPP-IV inhibitor                                                                                                                                                                 |
| LSSGDVFPVIPA       | 1104.27 | 0.48 | 0.07 | Vicilin            | VF, IPA, IP, SG, GD, LSSGDVF, PA, VI                                         | ACE inhibitor, DPP-IV inhibitor                                                                                                                                                                 |
| FFEITPEKNPQ        | 1349.51 | 0.21 | 0.08 | Vicilin            | EI, PQ, EK, TP, FF, NP, PE                                                   | ACE inhibitor, $\alpha$ -glucosidase inhibitor, DPP-IV inhibitor                                                                                                                                |
| SEAGLTETWNPNHPE    | 1681.74 | 0.21 | 0.10 | Legumin            | GL, AG, EA, TE, HP, SE, TW, NP, WN, ET, LT, NH, PN                           | ACE inhibitor, antioxidant, stimulating vasoactive substance release, $\alpha$ -glucosidase inhibitor, DPP-IV inhibitor                                                                         |
| LGGNPEIEFPETQQK    | 1686.84 | 0.23 | 0.09 | Legumin            | FP, GG, LG, QK, EI, IE, TKQ, EF, NP, ET, QQ, TQ, PE                          | ACE inhibitor, hypolipidemic, $\alpha$ -glucosidase inhibitor, DPP-IV inhibitor                                                                                                                 |
| RNGIYAPHWNINA      | 1525.69 | 0.49 | 0.12 | Legumin            | IY, AP, YA, GI, NG, PH, PHW, WN, HW, IN, NA, NG, RN                          | ACE inhibitor, antioxidant, DPP-IV inhibitor                                                                                                                                                    |
| RFSKGDVIAIPPGIP    | 1566.86 | 0.54 | 0.10 | Legumin            | IPP, PG, RF, AIP, IA, IP, GI, KG, AI, GD, IAIP, AIPP, IAIPP, PP, PPG, SK, VI | ACE inhibitor, antiinflammation, antiamnestic, $\alpha$ -amylase inhibitor, antithrombotic, regulating the stomach mucosal membrane activity, $\alpha$ -glucosidase inhibitor, DPP-IV inhibitor |
| TIDPNGLHLPSYSPSPQ  | 1822.99 | 0.25 | 0.07 | Legumin            | LHLP, PSY, GL, HL, NG, SY, PQ, LP, LH, LHL, SP, DP, PN, PS, TI, YS           | ACE inhibitor, antioxidant, DPP-IV inhibitor                                                                                                                                                    |
| ATPGEVLANAFGLR     | 1415.61 | 0.61 | 0.30 | Legumin            | PG, AF, LA, GL, FG, GE, EV, TP, LR, VL, LAN, AT, NA                          | ACE inhibitor, antioxidant, antiamnestic, antithrombotic, glucose uptake stimulation, regulating the stomach mucosal membrane activity, DPP-IV inhibitor                                        |
| GLTETWNPNHPEL      | 1507.62 | 0.30 | 0.16 | Legumin            | GL, TE, HP, EL, PEL, TW, TETWNPNHPEL, NP, WN, ET, LT, NH, PN                 | ACE inhibitor, antioxidant, $\alpha$ -glucosidase inhibitor, DPP-IV inhibitor                                                                                                                   |
| GQIVKVEDGLHIISP    | 1847.14 | 0.26 | 0.09 | Legumin            | VK, GL, GQ, DG, VE, DGL, IV, II, LH, EL, LHI, VKV, PEL, SP, HI, KV, QI, PE   | ACE inhibitor, antioxidant, neuropeptide, glucose uptake stimulation, $\alpha$ -glucosidase inhibitor, DPP-IV inhibitor                                                                         |
| RTIDPNGLHLPSYSPSPQ | 1979.18 | 0.23 | 0.10 | Legumin            | LHLP, PSY, GL, HL, NG, SY, PQ, LP, LH, LHL, SP, DP, PN, PS, TI, YS           | ACE inhibitor, antioxidant, DPP-IV inhibitor                                                                                                                                                    |
| IRENIARPSRGDL      | 1496.69 | 0.27 | 0.21 | Legumin            | IR, IA, RP, GD, AR, RG, RGD, PS                                              | ACE inhibitor, antioxidant, antithrombotic, DPP-IV inhibitor                                                                                                                                    |



|                        |         |      |      |         |                                                                              |                                                                                                                                                                                                 |
|------------------------|---------|------|------|---------|------------------------------------------------------------------------------|-------------------------------------------------------------------------------------------------------------------------------------------------------------------------------------------------|
| LTETWNPNHPEL           | 1450.57 | 0.21 | 0.16 | Legumin | TE, HP, EL, PEL, TW, TETWNPNHPEL, NP, WN, ET, LT, NH, PN                     | ACE inhibitor, antioxidant, $\alpha$ -glucosidase inhibitor, DPP-IV inhibitor                                                                                                                   |
| ISTVNSLTLPILR          | 1426.72 | 0.25 | 0.20 | Legumin | IL, ST, LR, LPILR, LP, SL, LT, PI, TL, TV, VN                                | ACE inhibitor, antioxidant, hypotensive, glucose uptake stimulation, DPP-IV inhibitor                                                                                                           |
| ENIARPSRGDLYNSGAG<br>R | 1933.07 | 0.29 | 0.17 | Legumin | LY, IA, RP, GA, AG, GR, SG, GD, YN, RGD, PS                                  | ACE inhibitor, antioxidant, antithrombotic, DPP-IV inhibitor                                                                                                                                    |
| YLGGNPEIEFPET          | 1465.58 | 0.25 | 0.06 | Legumin | FP, YL, GG, LG, EI, IE, EF, YLG, FN, NP, EI, ET, PE                          | ACE inhibitor, antioxidant, hypolipidemic, neuropeptide, $\alpha$ -glucosidase inhibitor, DPP-IV inhibitor                                                                                      |
| TETWNPNHPEL            | 1337.41 | 0.27 | 0.13 | Legumin | TE, HP, EL, PEL, TW, TETWNPNHPEL, NP, WN, ET, LT, NH, PN                     | ACE inhibitor, antioxidant, $\alpha$ -glucosidase inhibitor, DPP-IV inhibitor                                                                                                                   |
| RFSKGDVIAIPPGIPY       | 1730.04 | 0.47 | 0.09 | Legumin | IPP, PG, RF, AIP, IA, IP, GI, KG, AI, GD, IAIP, AIPP, IAIPP, PP, PPG, SK, VI | ACE inhibitor, antiinflammation, antiamnestic, $\alpha$ -amylase inhibitor, antithrombotic, regulating the stomach mucosal membrane activity, $\alpha$ -glucosidase inhibitor, DPP-IV inhibitor |
| GGNPEIEFPETQQK         | 1573.68 | 0.27 | 0.08 | Legumin | FP, GG, QK, EI, IE, TQ, EF, FN, NP, ET, QQ, TQ, PE                           | ACE inhibitor, hypolipidemic, $\alpha$ -glucosidase inhibitor, DPP-IV inhibitor                                                                                                                 |
| RNGIYAPHWNINAN         | 1639.79 | 0.49 | 0.13 | Legumin | IY, AP, YA, GI, NG, PH, PHW, WN, HW, IN, NA, NG, PH, RN                      | ACE inhibitor, antioxidant, DPP-IV inhibitor                                                                                                                                                    |
| PNGLHLPSYSPSPQ         | 1493.64 | 0.36 | 0.08 | Legumin | LHLP, PSY, GL, HL, NG, SY, PQ, LP, LH, LHL, SP, PN, PS, YS                   | ACE inhibitor, antioxidant, DPP-IV inhibitor                                                                                                                                                    |
| ENIARPSRGDL            | 1227.34 | 0.36 | 0.17 | Legumin | IA, RP, GD, AR, RG, RGD, PS                                                  | ACE inhibitor, antithrombotic, DPP-IV inhibitor                                                                                                                                                 |
| LGGNPEIEFPET           | 1302.40 | 0.33 | 0.06 | Legumin | FP, GG, LG, EI, IE, EF, NP, ET, PE                                           | ACE inhibitor, hypolipidemic, $\alpha$ -glucosidase inhibitor, DPP-IV inhibitor                                                                                                                 |
| FSKGDVIAIPPGIPY        | 1573.85 | 0.57 | 0.06 | Legumin | IPP, PG, RF, AIP, IA, IP, GI, KG, AI, GD, IAIP, AIPP, IAIPP, PP, PPG, SK, VI | ACE inhibitor, antiinflammation, antiamnestic, $\alpha$ -amylase inhibitor, antithrombotic, regulating the stomach mucosal membrane activity, $\alpha$ -glucosidase inhibitor, DPP-IV inhibitor |

|                  |         |      |      |                      |                                                                              |                                                                                                                                                                                                 |
|------------------|---------|------|------|----------------------|------------------------------------------------------------------------------|-------------------------------------------------------------------------------------------------------------------------------------------------------------------------------------------------|
| FSKGDVIAIPPGIP   | 1410.68 | 0.62 | 0.07 | Legumin              | IPP, PG, RF, AIP, IA, IP, GI, KG, AI, GD, IAIP, AIPP, IAIPP, PP, PPG, SK, VI | ACE inhibitor, antiinflammation, antiamnestic, $\alpha$ -amylase inhibitor, antithrombotic, regulating the stomach mucosal membrane activity, $\alpha$ -glucosidase inhibitor, DPP-IV inhibitor |
| ETWNPNHPE        | 1123.15 | 0.25 | 0.09 | Legumin              | HP, TW, WN, ET, NH, PN, PE                                                   | ACE inhibitor, antioxidant, $\alpha$ -glucosidase inhibitor, DPP-IV inhibitor                                                                                                                   |
| NALEPDHRVESEAGLT | 1737.84 | 0.20 | 0.14 | Legumin              | GL, AG, EA, VE, ALEPDHR, EP, AL, ES, HR, LT, NA, VE                          | ACE inhibitor, antioxidant, stimulating vasoactive substance release, $\alpha$ -glucosidase inhibitor, DPP-IV inhibitor                                                                         |
| AIPPGIP          | 663.81  | 0.79 | 0.07 | Legumin              | IPP, PG, AIP, IP, GI, AI, AIPP, PP, IP, PPG                                  | ACE inhibitor, antiinflammation, antiamnestic, $\alpha$ -amylase inhibitor, antithrombotic, regulating the stomach mucosal membrane activity, $\alpha$ -glucosidase inhibitor, DPP-IV inhibitor |
| SKGDVIAIPPGIPY   | 1426.68 | 0.52 | 0.07 | Legumin              | IPP, PG, AIP, IA, IP, GI, KG, AI, GD, IAIP, AIPP, IAIPP, PP, PPG, SK, VI     | ACE inhibitor, antiinflammation, antiamnestic, $\alpha$ -amylase inhibitor, antithrombotic, regulating the stomach mucosal membrane activity, $\alpha$ -glucosidase inhibitor, DPP-IV inhibitor |
| ALEPDHRVESEAGL   | 1522.63 | 0.23 | 0.13 | Legumin              | GL, AG, EA, VE, ALEP, SE, ALEPDHR, EP, AL, ES, HR, LT, NA, VE                | ACE inhibitor, antioxidant, stimulating vasoactive substance release, $\alpha$ -glucosidase inhibitor, DPP-IV inhibitor                                                                         |
| LIFIIQ GK        | 931.19  | 0.32 | 0.08 | Legumin              | IF, GK, QG, LI, II, IQ                                                       | ACE inhibitor, glucose uptake stimulation, DPP-IV inhibitor                                                                                                                                     |
| AAVSHVNQVFR      | 1227.39 | 0.25 | 0.21 | Legumin              | VF, AA, FR, AV, HV, NQ, QV, SH, VF, VN, VS                                   | ACE inhibitor, hypotensive, DPP-IV inhibitor                                                                                                                                                    |
| NINANSL          | 857.96  | 0.28 | 0.12 | Legumin              | LL, SL, IN, NA                                                               | glucose uptake stimulation, DPP-IV inhibitor                                                                                                                                                    |
| AGLTETWNPNHPEL   | 1578.70 | 0.31 | 0.17 | Legumin              | GL, AG, TE, HP, EL, PEL, TW, TETWNPNHPEL, NP, WN, ET, LT, NH, PN             | ACE inhibitor, antioxidant, $\alpha$ -glucosidase inhibitor, DPP-IV inhibitor                                                                                                                   |
| IPPGIPY          | 755.91  | 0.74 | 0.05 | Legumin/<br>Glycinin | IPP, PG, IP, GI, IPY, PP, PPG                                                | ACE inhibitor, antiinflammation, antiamnestic, $\alpha$ -amylase inhibitor, antithrombotic, regulating the stomach mucosal membrane activity, $\alpha$ -glucosidase inhibitor, DPP-IV inhibitor |
| FYLGGNPEIEFPET   | 1612.76 | 0.30 | 0.06 | Legumin              | FP, YL, FY, GG, LG, EI, IE, EF, YLG, NP, ET, PE, EF                          | ACE inhibitor, antioxidant, hypolipidemic, neuropeptide, $\alpha$ -glucosidase inhibitor, DPP-IV inhibitor                                                                                      |
| GLHLPSYSPSPQ     | 1282.42 | 0.33 | 0.07 | Legumin              | LHLP, PSY, GL, HL, SY, PQ, LP, LH, LHL, SP, PN, PS, YS                       | ACE inhibitor, antioxidant, DPP-IV inhibitor                                                                                                                                                    |

|               |         |      |      |         |                                                                          |                                                                                                                                                                                                 |
|---------------|---------|------|------|---------|--------------------------------------------------------------------------|-------------------------------------------------------------------------------------------------------------------------------------------------------------------------------------------------|
| GDVIAIPPGIP   | 1048.25 | 0.66 | 0.06 | Legumin | IPP, PG, AIP, IA, IP, GI, KG, AI, GD, IAIP, AIPP, IAIPP, PP, PPG, SK, VI | ACE inhibitor, antiinflammation, antiamnestic, $\alpha$ -amylase inhibitor, antithrombotic, regulating the stomach mucosal membrane activity, $\alpha$ -glucosidase inhibitor, DPP-IV inhibitor |
| SKGDVIAIPPGIP | 1263.50 | 0.56 | 0.07 | Legumin | IPP, PG, AIP, IA, IP, GI, KG, AI, GD, IAIP, AIPP, IAIPP, PP, PPG, SK, VI | ACE inhibitor, antiinflammation, antiamnestic, $\alpha$ -amylase inhibitor, antithrombotic, regulating the stomach mucosal membrane activity, $\alpha$ -glucosidase inhibitor, DPP-IV inhibitor |
| GGNPEIEFPETQQ | 1445.51 | 0.20 | 0.06 | Legumin | FP, GG, EI, IE, TQ, EF, FP, NP, EI, ET, QQ, TQ, PE                       | ACE inhibitor, hypolipidemic, $\alpha$ -glucosidase inhibitor, DPP-IV inhibitor                                                                                                                 |
| RTIDPNGL      | 884.99  | 0.31 | 0.17 | Legumin | GL, NG, DP, PN, TI                                                       | ACE inhibitor, DPP-IV inhibitor                                                                                                                                                                 |
| LGGNPEIEFPETQ | 1430.53 | 0.24 | 0.07 | Legumin | FP, GG, LG, EI, IE, TQ, EF, FP, NP, ET, PE, EF                           | ACE inhibitor, hypolipidemic, DPP-IV inhibitor                                                                                                                                                  |
| TETWNPNHPELK  | 1465.59 | 0.21 | 0.20 | Legumin | TE, HP, EL, PEL, TW, TETWNPNHPEL, NP, WN, ET, NH, PN                     | ACE inhibitor, antioxidant, $\alpha$ -glucosidase inhibitor, DPP-IV inhibitor                                                                                                                   |
| WNINAN        | 730.78  | 0.38 | 0.14 | Legumin | WN, IN, NA                                                               | DPP-IV inhibitor                                                                                                                                                                                |
| YLGGNPEIEFPPE | 1364.47 | 0.25 | 0.06 | Legumin | FP, YL, GG, LG, EI, IE, EF, YLG, NP, PE                                  | ACE inhibitor, antioxidant, neuropeptide, hypolipidemic, $\alpha$ -glucosidase inhibitor, DPP-IV inhibitor                                                                                      |
| ISTVNSLTLPIL  | 1270.53 | 0.27 | 0.13 | Legumin | IL, ST, LP, SL, LT, PI, TL, TV, VN                                       | ACE inhibitor, glucose uptake stimulation, DPP-IV inhibitor                                                                                                                                     |
| DVIAIPPGIPY   | 1154.37 | 0.52 | 0.06 | Legumin | IPP, PG, AIP, IA, IP, GI, KG, AI, GD, IAIP, AIPP, IAIPP, PP, PPG, SK, VI | ACE inhibitor, antiinflammation, antiamnestic, $\alpha$ -amylase inhibitor, antithrombotic, regulating the stomach mucosal membrane activity, $\alpha$ -glucosidase inhibitor, DPP-IV inhibitor |
| LHIISPEL      | 921.10  | 0.22 | 0.07 | Legumin | II, LH, EL, LHI, PEL, SP, HI, PE                                         | antioxidant, glucose uptake stimulation, $\alpha$ -glucosidase inhibitor, DPP-IV inhibitor                                                                                                      |
| TIDPNGLHLPS   | 1163.30 | 0.25 | 0.07 | Legumin | EK, KE, LEK, EEE, EE, EL                                                 | ACE inhibitor, antioxidant, stimulating vasoactive substance release, DPP-IV inhibitor                                                                                                          |
| FNVEFLAHS     | 1063.18 | 0.27 | 0.07 | Legumin | LA, VE, AH, EF, FL, FN, HS, NV                                           | ACE inhibitor, antioxidant, hypolipidemic, $\alpha$ -glucosidase inhibitor, DPP-IV inhibitor                                                                                                    |
| APHWNINAN     | 1036.11 | 0.68 | 0.12 | Legumin | AP, PH, PHW, WN, HW, IN, NA                                              | ACE inhibitor, antioxidant, DPP-IV inhibitor                                                                                                                                                    |

|                        |         |      |      |            |                                                                        |                                                                                                                                                                                                       |
|------------------------|---------|------|------|------------|------------------------------------------------------------------------|-------------------------------------------------------------------------------------------------------------------------------------------------------------------------------------------------------|
| YRNGIYAPHWNINANS<br>LL | 2116.37 | 0.44 | 0.13 | Legumin    | IY, AP, YA, GI, NG, PH, LL, YR, SL, PHW, LL,<br>SL, WN, HW, IN, NA, RN | ACE inhibitor, antioxidant, neuropeptide, glucose uptake stimulation,<br>DPP-IV inhibitor                                                                                                             |
| HLPSYSPSPQ             | 1112.21 | 0.33 | 0.06 | Legumin    | PSY, HL, SY, PQ, LP, SP, PS, YS                                        | ACE inhibitor, antioxidant, DPP-IV inhibitor                                                                                                                                                          |
| DVIAIPPGIP             | 991.20  | 0.57 | 0.06 | Legumin    | IPP, PG, AIP, IA, IP, GI, KG, AI, IAIP, AIPP,<br>IAIPP, PP, PPG        | ACE inhibitor, antiinflammation, antiamnestic, $\alpha$ -amylase inhibitor,<br>antithrombotic, regulating the stomach mucosal membrane activity,<br>$\alpha$ -glucosidase inhibitor, DPP-IV inhibitor |
| IAIPPGIPY              | 940.15  | 0.65 | 0.06 | Legumin    | IPP, PG, AIP, IA, IP, GI, AI, IAIP, AIPP, IAIPP, PP,<br>PPG            | ACE inhibitor, antiinflammation, antiamnestic, $\alpha$ -amylase inhibitor,<br>antithrombotic, regulating the stomach mucosal membrane activity,<br>$\alpha$ -glucosidase inhibitor, DPP-IV inhibitor |
| HIISPEL                | 807.94  | 0.25 | 0.06 | Legumin    | II, EL, PEL, SP, HI, PE                                                | antioxidant, glucose uptake stimulation, $\alpha$ -glucosidase inhibitor,<br>DPP-IV inhibitor                                                                                                         |
| IAIPPGIP               | 776.97  | 0.67 | 0.06 | Legumin    | IPP, PG, AIP, IA, IP, GI, AI, IAIP, AIPP, IAIPP, PP,<br>PPG            | ACE inhibitor, antiinflammation, antiamnestic, $\alpha$ -amylase inhibitor,<br>antithrombotic, regulating the stomach mucosal membrane activity,<br>$\alpha$ -glucosidase inhibitor, DPP-IV inhibitor |
| FYLGGNPEIE             | 1138.24 | 0.20 | 0.06 | Legumin    | YL, FY, GG, LG, EI, IE, YL, YLG, NP, PE                                | ACE inhibitor, antioxidant, neuropeptide, $\alpha$ -glucosidase inhibitor,<br>DPP-IV inhibitor                                                                                                        |
| AIPPGIPY               | 826.99  | 0.75 | 0.06 | Legumin    | IPP, PG, AIP, IA, IP, GI, AI, AIPP, IPY, PP, PPG                       | ACE inhibitor, antiinflammation, antiamnestic, $\alpha$ -amylase inhibitor,<br>antithrombotic, regulating the stomach mucosal membrane activity,<br>$\alpha$ -glucosidase inhibitor, DPP-IV inhibitor |
| VVVPQNFV               | 901.07  | 0.20 | 0.18 | Legumin    | VP, NF, PQ, VVV, VV, QN                                                | ACE inhibitor, anticancer, DPP-IV inhibitor                                                                                                                                                           |
| GDVIAIPPGIPY           | 1211.42 | 0.62 | 0.06 | Legumin    | IPP, PG, AIP, IA, IP, GI, AI, GD, IAIP, AIPP,<br>IAIPP, PP, PPG        | ACE inhibitor, antiinflammation, antiamnestic, $\alpha$ -amylase inhibitor,<br>antithrombotic, regulating the stomach mucosal membrane activity,<br>$\alpha$ -glucosidase inhibitor, DPP-IV inhibitor |
| GDTIKLPAGTTSYL         | 1436.62 | 0.33 | 0.16 | Convicilin | YL, AG, GT, SD, SY, KL, KLP, LP, IKL, PA, TI,<br>TS, TT                | ACE inhibitor, antioxidant, neuropeptide, DPP-IV inhibitor                                                                                                                                            |

|                         |         |      |      |            |                                                    |                                                                                                                                                                             |
|-------------------------|---------|------|------|------------|----------------------------------------------------|-----------------------------------------------------------------------------------------------------------------------------------------------------------------------------|
| SDLFENLQNYRLVE          | 1739.90 | 0.27 | 0.13 | Convicilin | RL, LF, NY, LVE, VE, LQ, LV, YR, NLQ, NL, QN       | ACE inhibitor, antiinflammation, neuropeptide, glucose uptake stimulation, $\alpha$ -glucosidase inhibitor, DPP-IV inhibitor                                                |
| DLVIPVNGPGK             | 1108.30 | 0.45 | 0.15 | Convicilin | PG, GP, IP, GK, NG, LV, PV, VI, VN                 | ACE inhibitor, antiamnesic, antithrombotic, glucose uptake stimulation, regulating the stomach mucosal membrane activity, DPP-IV inhibitor                                  |
| FTLTFENENGHI            | 1433.58 | 0.21 | 0.07 | Convicilin | LF, GH, NG, NEN, FL, HI, LT, NE, TL                | ACE inhibitor, antioxidant, DPP-IV inhibitor                                                                                                                                |
| LVIPVNGPGK              | 993.21  | 0.37 | 0.21 | Convicilin | PG, GP, IP, GK, NG, LV, PV, VI, VN                 | ACE inhibitor, antiamnesic, antithrombotic, glucose uptake stimulation, regulating the stomach mucosal membrane activity, DPP-IV inhibitor                                  |
| HGEWRPSYE               | 1160.21 | 0.36 | 0.09 | Convicilin | PSY, RP, HG, GE, SY, EW, YE, RP, WRP, WR, PS       | ACE inhibitor, DPP-IV inhibitor                                                                                                                                             |
| DDEEDLRLV               | 1103.15 | 0.25 | 0.14 | Convicilin | RL, LR, DEE, LV, EE                                | ACE inhibitor, antithrombotic, stimulating vasoactive substance release, glucose uptake stimulation, DPP-IV inhibitor                                                       |
| DLVIPVNGPGKFEA          | 1455.67 | 0.37 | 0.11 | Convicilin | PG, GP, IP, GK, EA, NG, LV, PV, VI, VN             | ACE inhibitor, antiamnesic, antithrombotic, glucose uptake stimulation, regulating the stomach mucosal membrane activity, $\alpha$ -glucosidase inhibitor, DPP-IV inhibitor |
| SDLFENLQNYR             | 1398.49 | 0.31 | 0.11 | Convicilin | LF, NY, LQ, YR, NLQ, NL, QN                        | ACE inhibitor, antiinflammation, neuropeptide, DPP-IV inhibitor                                                                                                             |
| GEWRPSYE                | 1023.07 | 0.35 | 0.10 | Convicilin | PSY, RP, GE, SY, EW, YE, RP, WRP, WR, PS           | ACE inhibitor, DPP-IV inhibitor                                                                                                                                             |
| SDLFENLQN               | 1079.13 | 0.26 | 0.08 | Convicilin | LF, LQ, NLQ, NL, QN                                | ACE inhibitor, antiinflammation, DPP-IV inhibitor                                                                                                                           |
| DLVIPVNGPGKFEAFDL<br>AK | 2030.35 | 0.63 | 0.14 | Convicilin | PG, GP, IP, AF, LA, GK, EA, NG, KF, LV, PV, VI, VN | ACE inhibitor, antiamnesic, antithrombotic, glucose uptake stimulation, regulating the stomach mucosal membrane activity, $\alpha$ -glucosidase inhibitor, DPP-IV inhibitor |
| LVIPVNGPGKFEA           | 1340.59 | 0.32 | 0.14 | Convicilin | PG, GP, IP, GK, EA, NG, KF, LV, PV, VI, VN         | ACE inhibitor, antiamnesic, antithrombotic, glucose uptake stimulation, regulating the stomach mucosal membrane activity, $\alpha$ -glucosidase inhibitor, DPP-IV inhibitor |
| FLPQHIDADLILV           | 1493.77 | 0.53 | 0.10 | Convicilin | DA, PQ, IL, LP, LV, LI, FL, AD, HI, QH, LPQ        | ACE inhibitor, glucose uptake stimulation, $\alpha$ -glucosidase inhibitor, DPP-IV inhibitor                                                                                |

|                  |         |      |      |            |                                                            |                                                                                                                                            |
|------------------|---------|------|------|------------|------------------------------------------------------------|--------------------------------------------------------------------------------------------------------------------------------------------|
| VDLVIPVNGPGK     | 1207.44 | 0.38 | 0.17 | Convicilin | PG, GP, IP, GK, EA, NG, NG, LV, PV, VD, VI, VN             | ACE inhibitor, antiamnesic, antithrombotic, glucose uptake stimulation, regulating the stomach mucosal membrane activity, DPP-IV inhibitor |
| GDTIKLPAGTT      | 1073.21 | 0.27 | 0.20 | Convicilin | AG, GT, GD, KL, KLP, LP, IKL, PA, TI, TT                   | ACE inhibitor, antioxidant, DPP-IV inhibitor                                                                                               |
| LFENLQNYRL       | 1309.49 | 0.50 | 0.21 | Convicilin | RL, LF, NY, LQ, YR, NLQ, NL, QN                            | ACE inhibitor, antiinflammation, neuropeptide, DPP-IV inhibitor                                                                            |
| LPQHIDADLILV     | 1346.59 | 0.46 | 0.11 | Convicilin | DA, PQ, IL, LP, LV, LI, AD, HI, QH, LPQ                    | ACE inhibitor, glucose uptake stimulation, $\alpha$ -glucosidase inhibitor, DPP-IV inhibitor                                               |
| SDFENLQNY        | 1242.31 | 0.23 | 0.07 | Convicilin | LF, NY, LQ, NLQ, NL, QN                                    | ACE inhibitor, antiinflammation, DPP-IV inhibitor                                                                                          |
| LVIPVNGPG        | 865.04  | 0.28 | 0.14 | Convicilin | PG, GP, IP, NG, LV, PV, VD, VI, VN                         | ACE inhibitor, antiamnesic, antithrombotic, glucose uptake stimulation, regulating the stomach mucosal membrane activity, DPP-IV inhibitor |
| LFENLQNYR        | 1196.33 | 0.29 | 0.17 | Convicilin | LF, NY, LQ, YR, NLQ, NL, QN                                | ACE inhibitor, antiinflammation, neuropeptide, DPP-IV inhibitor                                                                            |
| LPQHIDADL        | 1021.14 | 0.32 | 0.10 | Convicilin | DA, PQ, LP, AD, HI, QH, LPQ                                | ACE inhibitor, $\alpha$ -glucosidase inhibitor, DPP-IV inhibitor                                                                           |
| DEEDLRLV         | 988.06  | 0.23 | 0.18 | Convicilin | RL, LR, DEE, LV, EE                                        | ACE inhibitor, antithrombotic, stimulating vasoactive substance release, glucose uptake stimulation, DPP-IV inhibitor                      |
| FDKRSDLFENL      | 1383.52 | 0.53 | 0.12 | Convicilin | LF, KR, FDK, NL                                            | ACE inhibitor, DPP-IV inhibitor                                                                                                            |
| LFENLQ           | 762.86  | 0.22 | 0.13 | Convicilin | LF, LQ, NLQ, NL                                            | ACE inhibitor, antiinflammation, DPP-IV inhibitor                                                                                          |
| AKPHTIFLPQ       | 1151.37 | 0.53 | 0.15 | Convicilin | IF, KP, PQ, PH, IFL, LP, PHT, FL, HT, TI, LPQ              | ACE inhibitor, antioxidant, DPP-IV inhibitor                                                                                               |
| LLQRFD           | 790.92  | 0.37 | 0.32 | Convicilin | RF, LQ, LL                                                 | ACE inhibitor, glucose uptake stimulation, DPP-IV inhibitor                                                                                |
| RSDLFENL         | 993.08  | 0.48 | 0.14 | Convicilin | LF, NL                                                     | ACE inhibitor, DPP-IV inhibitor                                                                                                            |
| SDFENL           | 836.90  | 0.52 | 0.07 | Convicilin | LF, NL                                                     | ACE inhibitor, DPP-IV inhibitor                                                                                                            |
| TIDPNGLHLPSFSPSQ | 1806.99 | 0.34 | 0.07 | Legumin    | LHLP, GL, HL, NG, SF, PQ, LP, LH, LHL, SP, PN, PS, TI      | ACE inhibitor, antioxidant, DPP-IV inhibitor                                                                                               |
| FRKGDIIAIPSGIPY  | 1646.95 | 0.44 | 0.07 | Legumin    | AIP, IA, IP, FR, GI, KG, AI, SG, GD, IAIP, IPY, II, PY, PS | ACE inhibitor, antiinflammation, glucose uptake stimulation, DPP-IV inhibitor                                                              |

|                |         |      |      |         |                                                        |                                                                                                                              |
|----------------|---------|------|------|---------|--------------------------------------------------------|------------------------------------------------------------------------------------------------------------------------------|
| SQIVRVEGGLR    | 1213.40 | 0.36 | 0.28 | Legumin | IVR, GL, GG, EG, VR, VE, LR, IV, QI, VE                | ACE inhibitor, glucose uptake stimulation, $\alpha$ -glucosidase inhibitor, DPP-IV inhibitor                                 |
| PNGLHLPSFSPSPQ | 1477.64 | 0.51 | 0.08 | Legumin | LHLP, GL, HL, NG, SF, PQ, LP, LH, LHL, SP, PN, PS, TI  | ACE inhibitor, antioxidant, DPP-IV inhibitor                                                                                 |
| GLHLPSFSPSPQ   | 1266.42 | 0.45 | 0.07 | Legumin | LHLP, GL, HL, SF, PQ, LP, LH, LHL, SP, PS              | ACE inhibitor, antioxidant, DPP-IV inhibitor                                                                                 |
| KGDIIAIPSGIPY  | 1343.59 | 0.48 | 0.06 | Legumin | AIP, IA, IP, GI, KG, AI, SG, GD, IAIP, IPY, II, PY, PS | ACE inhibitor, antiinflammation, glucose uptake stimulation, DPP-IV inhibitor                                                |
| ATPSEVLANAFGLR | 1445.64 | 0.53 | 0.24 | Legumin | AF, LA, GL, FG, EV, TP, LR, VL, SE, LAN, AT, NA, PS    | ACE inhibitor, antioxidant, stimulating vasoactive substance release, glucose uptake stimulation, DPP-IV inhibitor           |
| DSINALEPDHR    | 1266.33 | 0.26 | 0.09 | Legumin | ALEP, ALEPDHR, EP, AL, HR, IN, NA, SI                  | ACE inhibitor, antioxidant, DPP-IV inhibitor                                                                                 |
| LKLSGNRGPL     | 1054.26 | 0.53 | 0.45 | Legumin | GP, LKL, GPL, PL, SG, KL, RG, LK, NR                   | ACE inhibitor, antioxidant, antiamnestic, antithrombotic, regulating the stomach mucosal membrane activity, DPP-IV inhibitor |
| GGNPETEFPETQ   | 1305.32 | 0.21 | 0.07 | Legumin | FP, GG, TE, TQ, EF, NP, ET, PE, EF                     | ACE inhibitor, hypolipidemic, $\alpha$ -glucosidase inhibitor, DPP-IV inhibitor                                              |
| ISTANSLTLPVLR  | 1384.64 | 0.26 | 0.29 | Legumin | ST, LR, LP, VL, SL, TA, LT, PV                         | ACE inhibitor, glucose uptake stimulation, DPP-IV inhibitor                                                                  |
| AAVSHVQQVFR    | 1241.42 | 0.21 | 0.24 | Legumin | VF, AA, FR, AV, HV, QQ, QV, SH, VQ, VS                 | ACE inhibitor, hypotensive, DPP-IV inhibitor                                                                                 |
| HLPSFSPSPQ     | 1096.21 | 0.47 | 0.06 | Legumin | HL, SF, PQ, LP, SP, PS                                 | ACE inhibitor, antioxidant, DPP-IV inhibitor                                                                                 |
| KGQLVVVPQNFVVA | 1497.80 | 0.26 | 0.34 | Legumin | VP, KG, GQ, NF, PQ, LV, VVV, VA, VP, VV, QL, QN        | ACE inhibitor, anticancer, neuropeptide, glucose uptake stimulation, DPP-IV inhibitor                                        |
| LGGNPETEFPET   | 1290.35 | 0.24 | 0.08 | Legumin | FP, GG, LG, TE, EF, NP, ET, PE                         | ACE inhibitor, hypolipidemic, $\alpha$ -glucosidase inhibitor, DPP-IV inhibitor                                              |
| KGDIIAIPS      | 913.08  | 0.25 | 0.06 | Legumin | AIP, IA, IP, KG, AI, GD, IAIP, II, PS                  | ACE inhibitor, glucose uptake stimulation, DPP-IV inhibitor                                                                  |
| WTYNHGDEPL     | 1231.29 | 0.21 | 0.09 | Legumin | PL, HG, GD, YN, TY, EP, WT, NH, YN                     | ACE inhibitor, antioxidant, DPP-IV inhibitor                                                                                 |
| GGNPETEFPET    | 1177.19 | 0.30 | 0.07 | Legumin | FP, GG, TE, EF, NP, ET, PE                             | ACE inhibitor, hypolipidemic, $\alpha$ -glucosidase inhibitor, DPP-IV inhibitor                                              |

|                          |         |      |      |         |                                                                              |                                                                                                                                                         |
|--------------------------|---------|------|------|---------|------------------------------------------------------------------------------|---------------------------------------------------------------------------------------------------------------------------------------------------------|
| LLLFASACLATSSE           | 1425.66 | 0.24 | 0.15 | Legumin | LF, LA, LLF, LLL, LL, SE, FA, AS, AT, TS                                     | ACE inhibitor, stimulating vasoactive substance release, glucose uptake stimulation, DPP-IV inhibitor                                                   |
| ASHKTNEVYFFKGDYY<br>AR   | 2196.41 | 0.21 | 0.12 | Albumin | VY, YA, KG, GD, AR, EV, HK, DY, YY, FF, DYY, YYA, VY, AS, EV, KT, NE, SH, TN | ACE inhibitor, antioxidant, DPP-IV inhibitor                                                                                                            |
| LFINDKYVLLDYAPGTS<br>NDK | 2286.57 | 0.20 | 0.13 | Albumin | PG, LF, AP, YA, GT, KY, DY, YV, LDY, YVL, PG, VL, LL, APG, IN, ND, TS, YV    | ACE inhibitor, antioxidant, antiamnesic, antithrombotic, glucose uptake stimulation, regulating the stomach mucosal membrane activity, DPP-IV inhibitor |
| FPPFEGTVFENGIDAAY<br>R   | 2080.28 | 0.50 | 0.08 | Albumin | VF, FP, AY, AA, GI, DA, GT, EG, NG, FEGTVFENG, FF, YR, TV                    | ACE inhibitor, antioxidant, neuropeptide, hypotensive, DPP-IV inhibitor                                                                                 |
| LYGPTPVRDG               | 1074.20 | 0.28 | 0.19 | Albumin | GP, LY, YG, VR, DG, PT, TP, PV                                               | ACE inhibitor, antioxidant, antiinflammation, antiamnesic, antithrombotic, regulating the stomach mucosal membrane activity, DPP-IV inhibitor           |
| KIADMFPFEGTV             | 1501.76 | 0.63 | 0.07 | Albumin | MF, FP, IA, GT, EG, DM, FF, AD, EG, KI, TV                                   | ACE inhibitor, $\alpha$ -glucosidase inhibitor, DPP-IV inhibitor                                                                                        |
| FEGTVFENGIDAA            | 1369.45 | 0.23 | 0.06 | Albumin | VF, AA, GI, DA, GT, EG, NG, FEGTVFENG, TV                                    | ACE inhibitor, hypotensive, DPP-IV inhibitor                                                                                                            |
| GKEVYLFGKDQ              | 1283.45 | 0.28 | 0.13 | Albumin | VY, YL, LF, KG, GK, GD, EV, KE, DQ, EV                                       | ACE inhibitor, antioxidant, neuropeptide, DPP-IV inhibitor                                                                                              |
| GKEVYLFGKDQYAR           | 1673.89 | 0.32 | 0.19 | Albumin | VY, YL, LF, YA, KG, GK, GD, AR, EV, KE, DQ, EV                               | ACE inhibitor, antioxidant, neuropeptide, DPP-IV inhibitor                                                                                              |
| TLDYWPSLR                | 1150.30 | 0.65 | 0.28 | Albumin | YW, DY, LR, LDY, SLR, SL, WP, PS, TL                                         | ACE inhibitor, antioxidant, antiinflammation, DPP-IV inhibitor                                                                                          |
| KIADMFPF                 | 968.18  | 0.92 | 0.07 | Albumin | MF, FP, IA, DM, AD, KI, PF                                                   | ACE inhibitor, $\alpha$ -glucosidase inhibitor, DPP-IV inhibitor                                                                                        |
| SSQNNEAYLFINDKYV         | 1905.05 | 0.28 | 0.08 | Albumin | YL, LF, AY, EA, KY, YV, IN, ND, NE, NN, QN                                   | ACE inhibitor, antioxidant, neuropeptide, $\alpha$ -glucosidase inhibitor, DPP-IV inhibitor                                                             |
| SSQNNEAYLFINDKYVL<br>L   | 2131.37 | 0.56 | 0.10 | Albumin | YL, LF, AY, EA, KY, YV, YVL, VL, LL, IN, ND, NE, NN, QN                      | ACE inhibitor, antioxidant, antibacterial, neuropeptide, glucose uptake stimulation, $\alpha$ -glucosidase inhibitor, DPP-IV inhibitor                  |
| TNEVYFFKGDYY             | 1545.67 | 0.21 | 0.06 | Albumin | VY, KG, GD, EV, DY, YY, FF, DYY, NE, TN, YF                                  | ACE inhibitor, antioxidant, DPP-IV inhibitor                                                                                                            |
| FPPFEGTV                 | 943.07  | 0.66 | 0.06 | Albumin | FP, GT, EG, FF, TV                                                           | ACE inhibitor, DPP-IV inhibitor                                                                                                                         |
| TLDYWPSL                 | 994.11  | 0.62 | 0.14 | Albumin | YW, DY, LDY, SL, WP, PS, TL                                                  | ACE inhibitor, antioxidant, antiinflammation, DPP-IV inhibitor                                                                                          |



|                          |         |      |      |                           |                                                                             |                                                                                                                   |
|--------------------------|---------|------|------|---------------------------|-----------------------------------------------------------------------------|-------------------------------------------------------------------------------------------------------------------|
| ENGIDAAYRSTR             | 1352.43 | 0.29 | 0.14 | Albumin                   | AY, AA, GI, DA, NG, ST, YR, NG, TR                                          | ACE inhibitor, hypotensive, antioxidant, neuropeptide, DPP-IV inhibitor                                           |
| FEGTVFENGIDA             | 1298.37 | 0.22 | 0.06 | Albumin                   | VF, GI, DA, GT, EG, NG, FEGTVFENG, TV                                       | ACE inhibitor, DPP-IV inhibitor                                                                                   |
| GKEVYLFK                 | 983.18  | 0.44 | 0.21 | Albumin                   | VY, YL, LF, GK, EV, KE, EV                                                  | ACE inhibitor, antioxidant, neuropeptide, DPP-IV inhibitor                                                        |
| KIADMFPFEGT              | 1402.63 | 0.74 | 0.07 | Albumin                   | MF, FP, IA, GT, EG, DM, FF, AD, EG, KI                                      | ACE inhibitor, $\alpha$ -glucosidase inhibitor, DPP-IV inhibitor                                                  |
| KTLDYWPSLR               | 1278.47 | 0.55 | 0.37 | Albumin                   | YW, DY, LR, LDY, SLR, SL, WP, KT, PS, TL                                    | ACE inhibitor, antioxidant, antiinflammation, DPP-IV inhibitor                                                    |
| KIADMFP                  | 821.00  | 0.73 | 0.08 | Albumin                   | MF, FP, IA, DM, FF, AD, KI                                                  | ACE inhibitor, $\alpha$ -glucosidase inhibitor, DPP-IV inhibitor                                                  |
| PFFEGTVF                 | 943.07  | 0.72 | 0.06 | Albumin                   | VF, GT, EG, FF, PF, TV                                                      | ACE inhibitor, DPP-IV inhibitor                                                                                   |
| FASHKTNEVYFFKGDY<br>YAR  | 2343.58 | 0.23 | 0.11 | Albumin                   | VY, YA, KG, GD, AR, EV, HK, DY, YY, FF, DYY,<br>YYA, FA, AS, KT, NE, SH, TN | ACE inhibitor, antioxidant, DPP-IV inhibitor                                                                      |
| ADMFPF                   | 726.85  | 0.98 | 0.05 | Albumin                   | MF, FP, DM, AD                                                              | ACE inhibitor, $\alpha$ -glucosidase inhibitor, DPP-IV inhibitor                                                  |
| RGIPL                    | 667.85  | 0.59 | 0.18 | Albumin                   | PL, IP, GI, RG, II                                                          | ACE inhibitor, glucose uptake stimulation, DPP-IV inhibitor                                                       |
| ASSNLNLLGFGINAENN<br>QR  | 2032.20 | 0.46 | 0.13 | Provicilin                | GF, GI, FG, LG, LN, LL, LGF, AE, AS, IN, NA, NL,<br>NN, NQ                  | ACE inhibitor, antioxidant, glucose uptake stimulation, DPP-IV inhibitor                                          |
| LTPGDVFPAGHPVAV<br>R     | 1845.17 | 0.37 | 0.21 | Provicilin                | PG, VF, IPA, IP, AG, GH, GD, VR, VAV, HP, AV,<br>TP, VAA, PA, TP, PV        | ACE inhibitor, antiamnesic, antithrombotic, regulating the stomach<br>mucosal membrane activity, DPP-IV inhibitor |
| KNPQLQDLDFVNY            | 1706.92 | 0.39 | 0.11 | Provicilin                | IF, NY, LQ, PQ, NP, QD, QL, VN                                              | ACE inhibitor, DPP-IV inhibitor                                                                                   |
| KNPQLQDLDFVNYVEI<br>K    | 2176.50 | 0.32 | 0.12 | Provicilin                | IF, NY, EI, VE, LQ, PQ, YV, YVE, NP, EI, QD, QL,<br>VN                      | ACE inhibitor, antioxidant, $\alpha$ -glucosidase inhibitor, DPP-IV inhibitor                                     |
| SSNLNLLGFGINAENNQ<br>R   | 1961.12 | 0.46 | 0.12 | Provicilin                | GF, GI, FG, LG, LN, LL, LGF, AE, IN, NA, NL,<br>NN, NQ                      | ACE inhibitor, antioxidant, glucose uptake stimulation, DPP-IV inhibitor                                          |
| KNPQLQDLDFVNYV           | 1806.05 | 0.36 | 0.12 | Provicilin                | IF, NY, LQ, PQ, YV, NP, QD, QL, VN                                          | ACE inhibitor, DPP-IV inhibitor                                                                                   |
| ASSNLNLLGFGINAENN<br>QRN | 2146.30 | 0.51 | 0.13 | Provicilin                | GF, GI, FG, LG, LN, LL, LGF, AE, IN, NA, NL,<br>NN, NQ, RN                  | ACE inhibitor, antioxidant, glucose uptake stimulation, DPP-IV inhibitor                                          |
| ASSNLNLLG                | 887.99  | 0.64 | 0.16 | Convicilin<br>/Provicilin | LG, LN, LL, AS, NL                                                          | ACE inhibitor, glucose uptake stimulation, DPP-IV inhibitor                                                       |

|                         |         |      |      |                           |                                                                 |                                                                                                                                            |
|-------------------------|---------|------|------|---------------------------|-----------------------------------------------------------------|--------------------------------------------------------------------------------------------------------------------------------------------|
| FFEITPK                 | 881.04  | 0.54 | 0.07 | Provicilin                | EL, TP, FF, PK                                                  | ACE inhibitor, DPP-IV inhibitor                                                                                                            |
| FFEITPKKNPQLQ           | 1589.85 | 0.39 | 0.15 | Provicilin                | EL, LQ, PQ, TP, FF, KK, NP, QL                                  | ACE inhibitor, DPP-IV inhibitor                                                                                                            |
| AKLTPGDVVFIPA           | 1327.59 | 0.34 | 0.18 | Provicilin                | PG, VF, IPA, IP, GD, KL, TP, PA, LT, VI                         | ACE inhibitor, antithrombotic, regulating the stomach mucosal membrane activity, DPP-IV inhibitor                                          |
| AKLTPGDVVFIPAGHPV<br>AV | 1888.24 | 0.43 | 0.21 | Provicilin                | PG, VF, IPA, IP, AG, GH, GD, VAV, KL, HP, AV,<br>TP, PA, LT, VI | ACE inhibitor, antiamnesic, antithrombotic, regulating the stomach mucosal membrane activity, DPP-IV inhibitor                             |
| ASSNLNLL                | 830.94  | 0.63 | 0.18 | Convicilin<br>/Provicilin | LN, LL, AS, NL                                                  | ACE inhibitor, glucose uptake stimulation, DPP-IV inhibitor                                                                                |
| SGSDDNVISQIENPVK        | 1701.81 | 0.20 | 0.06 | Convicilin                | VK, GS, SG, IE, NP, DN, NV, PV, QI, VI                          | ACE inhibitor, DPP-IV inhibitor                                                                                                            |
| GDTIKIPAGTTSYL          | 1436.62 | 0.30 | 0.11 | Convicilin                | IPA, YL, IP, AG, GT, GD, SY, KI, TI, TS, TT                     | ACE inhibitor, neuropeptide, DPP-IV inhibitor                                                                                              |
| AIVVLLVNEGKGNLEL        | 1681.01 | 0.35 | 0.26 | Convicilin                | KG, GK, AI, EG, VVL, VL, LV, IV, LL, EL, VV,<br>EG, NE, NL, VN  | ACE inhibitor, antioxidant, glucose uptake stimulation, DPP-IV inhibitor                                                                   |
| LSPGDVVIIPAGHPV         | 1470.73 | 0.39 | 0.09 | Convicilin                | PG, IPA, LSP, IP, AG, GH, GD, HP, II, PA, VV, SP,<br>PV, VI     | ACE inhibitor, antiamnesic, antithrombotic, glucose uptake stimulation, regulating the stomach mucosal membrane activity, DPP-IV inhibitor |
| LSPGDVVIIPAGHPVA        | 1541.81 | 0.39 | 0.10 | Convicilin                | PG, IPA, LSP, IP, AG, GH, GD, HP, II, PA, VV, SP,<br>PV, VI     | ACE inhibitor, antiamnesic, antithrombotic, glucose uptake stimulation, regulating the stomach mucosal membrane activity, DPP-IV inhibitor |
| AIVVLLVNEGKGNLE         | 1567.85 | 0.27 | 0.23 | Convicilin                | KG, GK, AI, EG, VVL, VL, LV, IV, LL, EL, VV,<br>EG, NE, NL, VN  | ACE inhibitor, glucose uptake stimulation, DPP-IV inhibitor                                                                                |
| FVIPVNRPGK              | 1126.37 | 0.57 | 0.22 | Convicilin                | PG, IP, RP, GK, NR, PV, VI, VN                                  | ACE inhibitor, antithrombotic, regulating the stomach mucosal membrane activity, DPP-IV inhibitor                                          |
| RVVDFVIPV               | 1043.27 | 0.21 | 0.18 | Convicilin                | IP, DF, VV, PV, VD, VI, RV                                      | ACE inhibitor, DPP-IV inhibitor                                                                                                            |
| DFVIPVNRPGK             | 1241.46 | 0.58 | 0.16 | Convicilin                | PG, IP, RP, GK, DF, NR, PV, VI, VN                              | ACE inhibitor, antiamnesic, antithrombotic, regulating the stomach mucosal membrane activity, DPP-IV inhibitor                             |

|                         |         |      |      |            |                                                                |                                                                                                                                                 |
|-------------------------|---------|------|------|------------|----------------------------------------------------------------|-------------------------------------------------------------------------------------------------------------------------------------------------|
| ASSNLNLLGFGINAKNN<br>Q  | 1875.07 | 0.43 | 0.14 | Convicilin | GF, GI, FG, LG, LN, LL, LGF, AS, IN, NA, NL,<br>NN, NQ         | ACE inhibitor, antioxidant, glucose uptake stimulation, DPP-IV<br>inhibitor                                                                     |
| VVIIPAGHPVA             | 1072.32 | 0.20 | 0.11 | Convicilin | IPA, IP, AG, GH, HP, II, VA, PA, VV, HP, PV, VI                | ACE inhibitor, glucose uptake stimulation, DPP-IV inhibitor                                                                                     |
| NNQRNFLSGSDDNVISQ       | 1907.97 | 0.23 | 0.09 | Convicilin | GS, SG, NF, FL, DN, NN, NQ, NV, RN, VI                         | ACE inhibitor, DPP-IV inhibitor                                                                                                                 |
| GDTIKIPAGT              | 972.11  | 0.27 | 0.10 | Convicilin | IPA, IP, AG, GT, GD, PA, KI, TI                                | ACE inhibitor, DPP-IV inhibitor                                                                                                                 |
| GDTIKIPAGTT             | 1073.21 | 0.24 | 0.12 | Convicilin | IPA, IP, AG, GT, GD, PA, KI, TI                                | ACE inhibitor, DPP-IV inhibitor                                                                                                                 |
| PGDVVVIIPAGHPVAIS       | 1541.81 | 0.39 | 0.08 | Convicilin | PG, IPA, IP, AG, GH, AI, GD, HP, II, VA, PA, VV,<br>HP, PV, VI | ACE inhibitor, antiemetic, antithrombotic, glucose uptake<br>stimulation, regulating the stomach mucosal membrane activity,<br>DPP-IV inhibitor |
| SGSDDNVISQI             | 1134.16 | 0.27 | 0.05 | Convicilin | GS, SG, DN, NV, QI, VI                                         | ACE inhibitor, DPP-IV inhibitor                                                                                                                 |
| GDTIKIPAG               | 871.00  | 0.34 | 0.09 | Convicilin | IPA, IP, AG, GD, PA, KI, TI                                    | ACE inhibitor, DPP-IV inhibitor                                                                                                                 |
| KYPQLQDLDI              | 1232.40 | 0.21 | 0.12 | Convicilin | YP, KY, LQ, PQ, QD, QL                                         | ACE inhibitor, $\alpha$ -glucosidase inhibitor, DPP-IV inhibitor                                                                                |
| KSLPSEFEPF              | 1180.32 | 0.56 | 0.07 | Convicilin | FEP, EF, LP, SE, SL, KS, PF, PS                                | ACE inhibitor, hypolipidemic, stimulating vasoactive substance<br>release, DPP-IV inhibitor                                                     |
| LMLPH                   | 609.78  | 0.58 | 0.24 | Convicilin | PH, LP, LM, ML                                                 | ACE inhibitor, DPP-IV inhibitor                                                                                                                 |
| VVIIPAGH                | 804.99  | 0.21 | 0.08 | Convicilin | IPA, IP, AG, GH, II, PA, VV, VI                                | ACE inhibitor, glucose uptake stimulation, DPP-IV inhibitor                                                                                     |
| GFGINAKNNQRN            | 1332.44 | 0.32 | 0.17 | Convicilin | GF, GI, FG, IN, NA, NN, NQ, RN                                 | ACE inhibitor, DPP-IV inhibitor                                                                                                                 |
| VIIPAGHPVA              | 973.18  | 0.23 | 0.10 | Convicilin | IPA, IP, AG, GH, HP, II, VA, PA, VV, PV, VI                    | ACE inhibitor, glucose uptake stimulation, DPP-IV inhibitor                                                                                     |
| VIIPAGHPV               | 902.10  | 0.23 | 0.08 | Convicilin | IPA, IP, AG, GH, HP, II, VA, PA, VV, PV, VI                    | ACE inhibitor, glucose uptake stimulation, DPP-IV inhibitor                                                                                     |
| ALMLPH                  | 680.86  | 0.62 | 0.26 | Convicilin | PH, LP, AL, LM, ML                                             | ACE inhibitor, DPP-IV inhibitor                                                                                                                 |
| FVIPVNRPG               | 998.19  | 0.54 | 0.14 | Convicilin | PG, IP, RP, NR, PV, VI, VN                                     | ACE inhibitor, antiemetic, antithrombotic, regulating the stomach<br>mucosal membrane activity, DPP-IV inhibitor                                |
| ASSNLNLLGFGINAKNN<br>QR | 2031.26 | 0.56 | 0.18 | Convicilin | GF, GI, FG, LG, LN, LL, LGF, AS, IN, LN, NA, NL,<br>NN, NQ     | ACE inhibitor, antioxidant, glucose uptake stimulation, DPP-IV<br>inhibitor                                                                     |

|                    |         |      |      |            |                                                                  |                                                                                                                                                          |
|--------------------|---------|------|------|------------|------------------------------------------------------------------|----------------------------------------------------------------------------------------------------------------------------------------------------------|
| SPGDVVIIPAGHPVAI   | 1541.81 | 0.53 | 0.08 | Convicilin | PG, IPA, IP, AG, GH, AI, GD, HP, II, VA, PA, VV, HP, PV, VI      | ACE inhibitor, antiamnestic, antithrombotic, glucose uptake stimulation, regulating the stomach mucosal membrane activity, DPP-IV inhibitor              |
| LSPGDVVIIPAGH      | 1274.48 | 0.45 | 0.08 | Convicilin | PG, IPA, LSP, IP, AG, GH, AI, GD, HP, II, VA, PA, VV, HP, PV, VI | ACE inhibitor, antiamnestic, antithrombotic, glucose uptake stimulation, regulating the stomach mucosal membrane activity, DPP-IV inhibitor              |
| KSLPSEFEP          | 1033.15 | 0.27 | 0.08 | Convicilin | FEP, EF, LP, SE, SL, EP, KS, PS                                  | ACE inhibitor, hypolipidemic, stimulating vasoactive substance release, DPP-IV inhibitor                                                                 |
| LMLPHYNS           | 974.14  | 0.22 | 0.09 | Convicilin | HY, PH, YN, LP, PHY, LM, ML                                      | ACE inhibitor, antioxidant, antiinflammation, DPP-IV inhibitor                                                                                           |
| LSPGDVVIIPAGHPVAIS | 1742.05 | 0.36 | 0.08 | Convicilin | PG, IPA, LSP, IP, AG, GH, AI, GD, HP, II, VA, PA, VV, HP, PV, VI | ACE inhibitor, antiamnestic, antithrombotic, glucose uptake stimulation, regulating the stomach mucosal membrane activity, DPP-IV inhibitor              |
| GALMLPH            | 737.92  | 0.66 | 0.21 | Convicilin | GA, PH, LP, AL, LM, ML                                           | ACE inhibitor, DPP-IV inhibitor                                                                                                                          |
| IKIPAGT            | 698.86  | 0.20 | 0.13 | Convicilin | IPA, IP, AG, FT, PA, KI                                          | ACE inhibitor, DPP-IV inhibitor                                                                                                                          |
| INKGALMLPH         | 1093.35 | 0.38 | 0.19 | Convicilin | GA, KG, NK, PH, LP, AL, IN, LM, ML                               | ACE inhibitor, DPP-IV inhibitor                                                                                                                          |
| IRENIADAAGADLYNPR  | 1859.03 | 0.32 | 0.16 | Legumin    | IR, LY, PR, IA, AA, GA, AG, DA, YN, NPR, AD                      | ACE inhibitor, antioxidant, hypotensive, $\alpha$ -glucosidase inhibitor, DPP-IV inhibitor                                                               |
| IRENIADAAGAD       | 1215.29 | 0.62 | 0.11 | Legumin    | IR, IA, AA, GA, AG, DA, YN, NPR, AD                              | ACE inhibitor, antioxidant, hypotensive, $\alpha$ -glucosidase inhibitor, DPP-IV inhibitor                                                               |
| ATPAEVLANAFGL      | 1273.45 | 0.58 | 0.22 | Legumin    | AF, LA, GL, FG, EV, TP, VL, LAN, PA, AE, AT, EF, NA              | ACE inhibitor, antioxidant, glucose uptake stimulation, DPP-IV inhibitor                                                                                 |
| LKLSGNGRPLVHPQ     | 1515.78 | 0.28 | 0.34 | Legumin    | GP, LKL, GPL, PL, SG, KL, PQ, HP, RG, LV, LK, NR, VH             | ACE inhibitor, antioxidant, antiamnestic, antithrombotic, glucose uptake stimulation, regulating the stomach mucosal membrane activity, DPP-IV inhibitor |
| IVNFQGDVFDNK       | 1466.61 | 0.22 | 0.09 | Legumin    | VF, DA, QG, GD, NF, NK, AV, FQ, IV, DN, QG, VN, DA               | ACE inhibitor, glucose uptake stimulation, DPP-IV inhibitor                                                                                              |

|                    |         |      |      |          |                                                                 |                                                                                                                         |
|--------------------|---------|------|------|----------|-----------------------------------------------------------------|-------------------------------------------------------------------------------------------------------------------------|
| ATPAEVLANAFGLRQR   | 1713.96 | 0.48 | 0.48 | Legumin  | AF, LA, GL, FG, EV, TP, VL, LAN, PA, AE, AT, EF, NA             | ACE inhibitor, antioxidant, glucose uptake stimulation, DPP-IV inhibitor                                                |
| ATPAEVLANAF        | 1103.24 | 0.26 | 0.21 | Legumin  | AF, LA, EV, TP, VL, LAN, PA, AE, AT, NA                         | ACE inhibitor, antioxidant, glucose uptake stimulation, DPP-IV inhibitor                                                |
| GLTETWNPNNPELK     | 1612.76 | 0.22 | 0.24 | Legumin  | GL, TE, EL, PEL, LK, TW, NP, WN, ET, LT, NN, PN, PE             | ACE inhibitor, antioxidant, $\alpha$ -glucosidase inhibitor, DPP-IV inhibitor                                           |
| TETWNPNNPEL        | 1314.37 | 0.21 | 0.16 | Legumin  | TE, EL, PEL, LK, TW, NP, WN, ET, LT, NN, PN, PE                 | ACE inhibitor, antioxidant, $\alpha$ -glucosidase inhibitor, DPP-IV inhibitor                                           |
| DNINALEPDHR        | 1293.36 | 0.21 | 0.10 | Legumin  | ALEP, ALEPDHR, EP, AL, DN, HR, IN, NA                           | ACE inhibitor, antioxidant, DPP-IV inhibitor                                                                            |
| SEAGLTETWNPNNPEL   | 1771.86 | 0.34 | 0.13 | Legumin  | GL, AG, EA, TE, SE, EL, PEL, TW, NP, WN, ET, LT, NN, PN, PE     | ACE inhibitor, antioxidant, stimulating vasoactive substance release, $\alpha$ -glucosidase inhibitor, DPP-IV inhibitor |
| VESEAGLTETWNPNNPEL | 2000.11 | 0.23 | 0.13 | Legumin  | GL, AG, EA, VE, TE, SE, EL, PEL, TW, NP, WN, ET, LT, NN, PN, PE | ACE inhibitor, antioxidant, stimulating vasoactive substance release, $\alpha$ -glucosidase inhibitor, DPP-IV inhibitor |
| GLTETWNPNNPEL      | 1484.59 | 0.26 | 0.18 | Legumin  | GL, TE, EL, PEL, TW, NP, WN, ET, LT, NN, PN, PE                 | ACE inhibitor, antioxidant, $\alpha$ -glucosidase inhibitor, DPP-IV inhibitor                                           |
| AGLTETWNPNNPEL     | 1555.66 | 0.28 | 0.19 | Legumin  | GL, AG, TE, EL, PEL, TW, NP, WN, ET, LT, NN, PN, PE             | ACE inhibitor, antioxidant, $\alpha$ -glucosidase inhibitor, DPP-IV inhibitor                                           |
| AGLTETWNPNNPELK    | 1683.84 | 0.24 | 0.26 | Legumin  | GL, AG, TE, EL, PEL, LK, TW, NP, WN, ET, LT, NN, PN, PE         | ACE inhibitor, antioxidant, $\alpha$ -glucosidase inhibitor, DPP-IV inhibitor                                           |
| RSPEDDRKQIVK       | 1470.65 | 0.21 | 0.26 | Glycinin | VK, DR, IV, SP, QI, RK, PE                                      | ACE inhibitor, glucose uptake stimulation, $\alpha$ -glucosidase inhibitor, DPP-IV inhibitor                            |
| DLAGSSQADVFNPR     | 1476.57 | 0.41 | 0.12 | Legumin  | VF, PR, LA, AG, GS, AGSS, AGS, ADVFNPR, NPR, NP, AD, FN, QA     | ACE inhibitor, antioxidant, hypotensive, $\alpha$ -glucosidase inhibitor, DPP-IV inhibitor                              |
| HEDLAGSSQADVFNPR   | 1742.82 | 0.30 | 0.10 | Legumin  | VF, PR, LA, AG, GS, AGSS, AGS, ADVFNPR, NPR, NP, AD, FN, QA     | ACE inhibitor, antioxidant, hypotensive, $\alpha$ -glucosidase inhibitor, DPP-IV inhibitor                              |

|                      |         |      |      |          |                                                                  |                                                                                            |
|----------------------|---------|------|------|----------|------------------------------------------------------------------|--------------------------------------------------------------------------------------------|
| EDLAGSSQADVFNPR      | 1605.68 | 0.32 | 0.11 | Legumin  | VF, PR, LA, AG, GS, AGSS, AGS, ADVFNPR, NPR, NP, AD, FN, QA      | ACE inhibitor, antioxidant, hypotensive, $\alpha$ -glucosidase inhibitor, DPP-IV inhibitor |
| LHEDLAGSSQADVFNPR    | 1855.98 | 0.36 | 0.12 | Legumin  | VF, PR, LA, AG, GS, AGSS, AGS, ADVFNPR, NPR, NP, AD, FN, QA      | ACE inhibitor, antioxidant, hypotensive, $\alpha$ -glucosidase inhibitor, DPP-IV inhibitor |
| WNLNAN               | 730.78  | 0.41 | 0.26 | Legumin  | LN, WN, NA, NL                                                   | ACE inhibitor, DPP-IV inhibitor                                                            |
| ITSVNSLTLPVLKLLHLSAQ | 2147.59 | 0.20 | 0.29 | Legumin  | LKL, HL, KL, LP, VL, LL, SL, LH, LHL, LK, LT, PV, SV, TL, TS, VN | ACE inhibitor, antioxidant, glucose uptake stimulation, DPP-IV inhibitor                   |
| KNGIFMPH             | 943.13  | 0.74 | 0.08 | Legumin  | IF, GI, NG, PH, MP, FM                                           | ACE inhibitor, DPP-IV inhibitor                                                            |
| FREGDLIAVPT          | 1217.39 | 0.24 | 0.14 | Glycinin | AVP, IA, VP, FR, GD, EG, PT, AV, LI                              | ACE inhibitor, glucose uptake stimulation, DPP-IV inhibitor                                |
| VLIVPQNFAVAA         | 1241.50 | 0.28 | 0.19 | Glycinin | VAA, VLIVP, VP, AA, NF, PQ, AV, VL, IV, LI, FA, VP, QN           | ACE inhibitor, hypotensive, glucose uptake stimulation, DPP-IV inhibitor                   |
| PQTFEEPTQRG          | 1289.37 | 0.21 | 0.15 | Glycinin | PT, TQ, PQ, TF, RG, EE, TFE, EP, QT, TF                          | ACE inhibitor, antioxidant, stimulating vasoactive substance release, DPP-IV inhibitor     |
| QQGSGIFGIIFSGCPQ     | 1638.86 | 0.78 | 0.05 | Glycinin | IF, GI, FG, GS, QG, SG, IFG, PQ, IL, QQ                          | ACE inhibitor, glucose uptake stimulation, DPP-IV inhibitor                                |
| SLNQTIIFS            | 966.06  | 0.28 | 0.06 | Albumin  | IF, FG, GS, IFG, LN, SL, NQ, QT, TI                              | ACE inhibitor, DPP-IV inhibitor                                                            |

<sup>a</sup>From PeptideRanker. <sup>b</sup>From CPPpred. <sup>c</sup>From ExPASy ProtParam. <sup>d</sup>From BIOPEP.

Table S4. Potential bioactive peptides in ByPP-rice protein.

| Peptide sequence         | MW      | PeptideRanker<br>score <sup>a</sup> | CPPpred<br>score <sup>b</sup> | Parent<br>protein     | Potential bioactive peptides <sup>d</sup>                                                                   | Biological function <sup>d</sup>                                                                                                        |
|--------------------------|---------|-------------------------------------|-------------------------------|-----------------------|-------------------------------------------------------------------------------------------------------------|-----------------------------------------------------------------------------------------------------------------------------------------|
| QNIDNPNRADTYNPR          | 1787.87 | 0.25                                | 0.16                          | Glutelin/G<br>lobulin | PR, RA, YN, NPR, TY, NP, AD, DN, NR, PN, QN                                                                 | ACE inhibitor, antioxidant, $\alpha$ -glucosidase inhibitor, DPP-IV inhibitor                                                           |
| GLLLPHYTNGASLVYII<br>QGR | 2185.55 | 0.39                                | 0.15                          | Glutelin/G<br>lobulin | VY, HY, LLP, GA, GL, GR, QG, NG, PH, LVY,<br>ASL, LP, LLL, LV, II, LL, SL, LLPH, PHY, YT, AS,<br>IQ, TN, YI | ACE inhibitor, antioxidant, antiinflammation, stimulating vasoactive<br>substance release, glucose uptake stimulation, DPP-IV inhibitor |
| QGDVIALPAGVAHW           | 1433.63 | 0.66                                | 0.17                          | Glutelin/G<br>lobulin | IA, AG, GV, QG, GD, AH, ALH, LPAGV, LP, VA,<br>PA, AL, HW, VI                                               | ACE inhibitor, antioxidant, DPP-IV inhibitor                                                                                            |
| GLLLPHYTNGASLV           | 1454.69 | 0.39                                | 0.19                          | Glutelin/G<br>lobulin | HY, LLP, GA, GL, NG, PH, ASL, LP, LLL, LV, LL,<br>SL, LLPH, PHY, YT, AS, TN                                 | ACE inhibitor, antioxidant, antiinflammation, stimulating vasoactive<br>substance release, glucose uptake stimulation, DPP-IV inhibitor |
| GQLLIIPQ                 | 881.08  | 0.33                                | 0.12                          | Glutelin/G<br>lobulin | IP, GQ, PQ, LI, II, LL, QL                                                                                  | ACE inhibitor, neuropeptide, glucose uptake stimulation, DPP-IV<br>inhibitor                                                            |
| GQLLIIPQH                | 1018.22 | 0.32                                | 0.10                          | Glutelin/G<br>lobulin | IP, GQ, PQ, LIIPQH, LI, LL, II, QH, QL                                                                      | ACE inhibitor, neuropeptide, glucose uptake stimulation, DPP-IV<br>inhibitor                                                            |
| FDRLQAFEP                | 1235.41 | 0.41                                | 0.11                          | Glutelin/G<br>lobulin | RL, AF, LQ, FEP, DR, EP, PI, QA                                                                             | ACE inhibitor, DPP-IV inhibitor                                                                                                         |
| NTQNFPI                  | 946.07  | 0.54                                | 0.10                          | Glutelin              | FP, NF, TQ, IL, NT, PI, QN                                                                                  | ACE inhibitor, glucose uptake stimulation, DPP-IV inhibitor                                                                             |
| DFLLAGNK                 | 877.01  | 0.36                                | 0.21                          | Glutelin/G<br>lobulin | LA, AG, NK, DF, LL, FL                                                                                      | ACE inhibitor, glucose uptake stimulation, DPP-IV inhibitor                                                                             |
| LQAFEPISV                | 1159.35 | 0.32                                | 0.13                          | Glutelin/G<br>lobulin | IR, AF, LQ, FEP, EP, PI, QA, SV                                                                             | ACE inhibitor, antioxidant, DPP-IV inhibitor                                                                                            |
| NTQNFPI                  | 1060.17 | 0.39                                | 0.10                          | Glutelin              | FP, NF, LN, TQ, IL, NT, PI, QN, TQ                                                                          | ACE inhibitor, glucose uptake stimulation, DPP-IV inhibitor                                                                             |
| GLLLPHYTNGASL            | 1355.56 | 0.51                                | 0.17                          | Glutelin/G<br>lobulin | HY, LLP, GA, GL, NG, PH, ASL, LP, LLL, LL, SL,<br>LLPH, PHY, YT, AS, TN                                     | ACE inhibitor, antioxidant, antiinflammation, stimulating vasoactive<br>substance release, glucose uptake stimulation, DPP-IV inhibitor |

|                 |         |      |      |                       |                                                           |                                                                                                                                                                             |
|-----------------|---------|------|------|-----------------------|-----------------------------------------------------------|-----------------------------------------------------------------------------------------------------------------------------------------------------------------------------|
| QGDVIALPA       | 883.01  | 0.35 | 0.13 | Glutelin/G<br>lobulin | IA, QG, GD, ALP, LP, PA, AL, VI                           | ACE inhibitor, DPP-IV inhibitor                                                                                                                                             |
| QGDVIALPAGV     | 1039.20 | 0.47 | 0.14 | Glutelin/G<br>lobulin | IA, AG, GV, QG, GD, ALP, LPAGV, LP, PA, AL,<br>VI         | ACE inhibitor, antioxidant, DPP-IV inhibitor                                                                                                                                |
| LIIPQH          | 719.88  | 0.24 | 0.08 | Glutelin/G<br>lobulin | IP, PQ, LIIPQH, LI, II, QH                                | ACE inhibitor, glucose uptake stimulation, DPP-IV inhibitor                                                                                                                 |
| RVIQPQGLLVPR    | 1375.68 | 0.33 | 0.54 | Glutelin/G<br>lobulin | PR, VP, GL, QG, PQ, IQP, QP, LV, LL, IQ, VI               | ACE inhibitor, glucose uptake stimulation, DPP-IV inhibitor                                                                                                                 |
| TVFDGVLRPGQL    | 1301.51 | 0.25 | 0.30 | Glutelin/G<br>lobulin | PG, VF, LRP, RP, GV, GQ, PG, DG, LR, VL, QL,<br>TV        | ACE inhibitor, anti-amnesic, neuropeptide, antithrombotic, glucose<br>uptake stimulation, DPP-IV inhibitor                                                                  |
| DGVLRPGQL       | 954.09  | 0.36 | 0.34 | Glutelin/G<br>lobulin | PG, LRP, RP, GV, GQ, DG, LR, VL, QL                       | ACE inhibitor, anti-amnesic, neuropeptide, antithrombotic, glucose<br>uptake stimulation, regulating the stomach mucosal membrane<br>activity, DPP-IV inhibitor             |
| QQQYYPGLSN      | 1197.27 | 0.38 | 0.08 | Glutelin/G<br>lobulin | PG, YP, PGL, GL, YPG, YY, YYP, YYPG, QYY,<br>GL, QQ, QY   | ACE inhibitor, antioxidant, anti-amnesic, opioid, antithrombotic,<br>regulating the stomach mucosal membrane activity, $\alpha$ -glucosidase<br>inhibitor, DPP-IV inhibitor |
| QGDIVALPAGVAHW  | 1433.63 | 0.60 | 0.17 | Glutelin/G<br>lobulin | AG, GV, QG, GD, AH, ALP, LPAGV, LP, IV, VA,<br>PA, AL, HW | ACE inhibitor, antioxidant, glucose uptake stimulation, DPP-IV<br>inhibitor                                                                                                 |
| TVFDGVLRPGQLL   | 1414.67 | 0.35 | 0.35 | Glutelin/G<br>lobulin | PG, VF, LRP, RP, GV, GQ, DG, LR, VL, LL, QL,<br>TV        | ACE inhibitor, anti-amnesic, neuropeptide, antithrombotic, glucose<br>uptake stimulation, regulating the stomach mucosal membrane<br>activity, DPP-IV inhibitor             |
| VNIENPSRADSYNPR | 1731.84 | 0.21 | 0.12 | Glutelin/G<br>lobulin | PR, RA, SY, IE, YN, NPR, NP, AD, PS, VN                   | ACE inhibitor, $\alpha$ -glucosidase inhibitor, DPP-IV inhibitor                                                                                                            |
| SRVQVVSNGFK     | 1220.39 | 0.25 | 0.22 | Glutelin/G<br>lobulin | FGK, FG, GK, NF, VQV, VV, QV, VQ, VS                      | ACE inhibitor, DPP-IV inhibitor                                                                                                                                             |



|                |         |      |      |                       |                                                                |                                                                                                                                                                       |
|----------------|---------|------|------|-----------------------|----------------------------------------------------------------|-----------------------------------------------------------------------------------------------------------------------------------------------------------------------|
| GEIIHVKNGLQ    | 1207.40 | 0.21 | 0.11 | Glutelin/G<br>lobulin | VK, GL, GE, NG, EI, LQ, II, HV, IH, II                         | ACE inhibitor, glucose uptake stimulation, DPP-IV inhibitor                                                                                                           |
| ITSVNSQKFPILN  | 1460.69 | 0.20 | 0.09 | Glutelin/G<br>lobulin | FP, QK, KF, LN, IL, PI, SV, TS, VN                             | ACE inhibitor, glucose uptake stimulation, DPP-IV inhibitor                                                                                                           |
| VIQPQGLLVPR    | 1219.49 | 0.42 | 0.37 | Glutelin/G<br>lobulin | PR, VP, GL, QG, PQ, IQP, QP, LV, LL                            | ACE inhibitor, glucose uptake stimulation, DPP-IV inhibitor                                                                                                           |
| FDRLQAFEPL     | 1235.41 | 0.51 | 0.19 | Glutelin/G<br>lobulin | RL, PL, AF, LQ, FEP, DR, EP, QA                                | ACE inhibitor, DPP-IV inhibitor                                                                                                                                       |
| DGVLRPGQLLIIPQ | 1518.82 | 0.41 | 0.20 | Glutelin/G<br>lobulin | PG, LRP, IP, RP, GV, GQ, DG, PQ, LR, VL, LI, II,<br>LL, IP, QL | ACE inhibitor, antiamnestic, neuropeptide, antithrombotic, glucose uptake stimulation, regulating the stomach mucosal membrane activity, DPP-IV inhibitor             |
| FQQQYYPGLS     | 1230.34 | 0.56 | 0.07 | Glutelin/G<br>lobulin | PG, YP, PGL, GL, YPG, FQ, YY, YYP, YYPG,<br>QYY, QQ, QY        | ACE inhibitor, antioxidant, antiamnestic, opioid, antithrombotic, regulating the stomach mucosal membrane activity, $\alpha$ -glucosidase inhibitor, DPP-IV inhibitor |
| DGVLRPGQLL     | 1067.25 | 0.49 | 0.41 | Glutelin/G<br>lobulin | FG, LRP, RP, GV, GQ, PG, DG, LR, VL, LL, QL                    | ACE inhibitor, antiamnestic, neuropeptide, antithrombotic, glucose uptake stimulation, regulating the stomach mucosal membrane activity, DPP-IV inhibitor             |
| FQQQYYPGLSN    | 1344.45 | 0.46 | 0.07 | Glutelin/G<br>lobulin | PG, YP, PGL, GL, YPG, FQ, YY, YYP, YYPG,<br>QYY, QQ, QY        | ACE inhibitor, antioxidant, antiamnestic, opioid, antithrombotic, regulating the stomach mucosal membrane activity, $\alpha$ -glucosidase inhibitor, DPP-IV inhibitor |
| NGLQLLKPTLT    | 1197.44 | 0.34 | 0.56 | Glutelin/G<br>lobulin | LKP, GL, NG, KP, LQ, PT, LQL, LL, LKPT, KPT,<br>LK, LT, QL, TL | ACE inhibitor, antioxidant, neuropeptide, glucose uptake stimulation, stimulating GLP-1 release, DPP-IV inhibitor                                                     |
| RQGDIVALPA     | 1039.20 | 0.23 | 0.23 | Glutelin/G<br>lobulin | QG, GD, ALP, LP, IV, VA, PA, AL                                | ACE inhibitor, glucose uptake stimulation, DPP-IV inhibitor                                                                                                           |
| PRYTNIPGVV     | 1115.30 | 0.27 | 0.18 | Glutelin/G<br>lobulin | PG, RY, PRY, PR, IP, GV, VV, YT, TN                            | ACE inhibitor, antioxidant, antiamnestic, antithrombotic, regulating the stomach mucosal membrane activity, DPP-IV inhibitor                                          |

|                  |         |      |      |                       |                                                 |                                                                                                                                                           |
|------------------|---------|------|------|-----------------------|-------------------------------------------------|-----------------------------------------------------------------------------------------------------------------------------------------------------------|
| TVFDGVL RPG      | 1060.22 | 0.29 | 0.24 | Glutelin/G<br>lobulin | PG, VF, LRP, RP, GV, DG, LR, VL, TV             | ACE inhibitor, antiamnestic, antithrombotic, glucose uptake stimulation, regulating the stomach mucosal membrane activity, DPP-IV inhibitor               |
| QGDIVALPAGV      | 1039.20 | 0.38 | 0.14 | Glutelin/G<br>lobulin | AG, GV, QG, GD, ALP, LPAGV, LP, IV, VA, PA, AL  | ACE inhibitor, antioxidant, glucose uptake stimulation, DPP-IV inhibitor                                                                                  |
| GQLLIVPQ         | 867.06  | 0.24 | 0.19 | Glutelin/G<br>lobulin | VP, GQ, PQ, IV, LI, LL, QL                      | ACE inhibitor, neuropeptide, glucose uptake stimulation, DPP-IV inhibitor                                                                                 |
| LNENPSHADTYNPR   | 1740.85 | 0.21 | 0.10 | Glutelin/G<br>lobulin | PR, IE, LN, YN, NPR, TY, HA, NP, AD, PS, SH     | ACE inhibitor, antioxidant, $\alpha$ -glucosidase inhibitor, DPP-IV inhibitor                                                                             |
| LYVFDLNNNANQLEPR | 1920.11 | 0.25 | 0.17 | Glutelin/G<br>lobulin | LY, VF, PR, LN, YV, LY, EP, LN, NA, NN, NQ, QL  | ACE inhibitor, antioxidant, DPP-IV inhibitor                                                                                                              |
| VFDLNNNANQLEPR   | 1643.78 | 0.24 | 0.18 | Glutelin/G<br>lobulin | VF, PR, LN, EP, NA, NN, NQ, QL                  | ACE inhibitor, DPP-IV inhibitor                                                                                                                           |
| NIENPSHADTYNPR   | 1627.69 | 0.22 | 0.09 | Glutelin/G<br>lobulin | PR, IE, YN, NPR, TY, HA, NP, AD, PS, SH         | ACE inhibitor, antioxidant, $\alpha$ -glucosidase inhibitor, DPP-IV inhibitor                                                                             |
| YVFDLNNNANQLEPR  | 1806.95 | 0.27 | 0.15 | Glutelin/G<br>lobulin | VF, PR, LN, YV, EP, NA, NN, NQ, QL              | ACE inhibitor, DPP-IV inhibitor                                                                                                                           |
| TVFNGVLRPGQL     | 1300.52 | 0.21 | 0.36 | Glutelin/G<br>lobulin | PG, VF, LRP, RP, GV, GQ, NG, LR, VL, FN, QL, TV | ACE inhibitor, antiamnestic, neuropeptide, antithrombotic, glucose uptake stimulation, regulating the stomach mucosal membrane activity, DPP-IV inhibitor |
| GEELGAFTPR       | 1076.17 | 0.37 | 0.15 | Glutelin/G<br>lobulin | PR, AF, GA, GE, LG, TP, EE, EL                  | ACE inhibitor, antioxidant, stimulating vasoactive substance release, DPP-IV inhibitor                                                                    |
| NGVLRPGQL        | 953.11  | 0.29 | 0.45 | Glutelin/G<br>lobulin | PG, LRP, RP, GV, GQ, NG, LR, VL, GQ, QL         | ACE inhibitor, antiamnestic, neuropeptide, antithrombotic, glucose uptake stimulation, regulating the stomach mucosal membrane activity, DPP-IV inhibitor |

|                  |         |      |      |                       |                                                                |                                                                                                                                                                     |
|------------------|---------|------|------|-----------------------|----------------------------------------------------------------|---------------------------------------------------------------------------------------------------------------------------------------------------------------------|
| IENPSHADTYNPR    | 1513.59 | 0.27 | 0.08 | Glutelin/G<br>lobulin | PR, IE, YN, NPR, TY, HA, NP, AD, PS, SH                        | ACE inhibitor, antioxidant, $\alpha$ -glucosidase inhibitor, DPP-IV inhibitor                                                                                       |
| SLKNNRGEELGAFTPR | 1788.98 | 0.27 | 0.25 | Glutelin/G<br>lobulin | PR, AF, GA, GE, LG, TP, RG, EE, SL, EL, LK, NN,<br>NR          | ACE inhibitor, antioxidant, stimulating vasoactive substance release,<br>DPP-IV inhibitor                                                                           |
| TVFNGVLRPGQLL    | 1413.68 | 0.29 | 0.42 | Glutelin/G<br>lobulin | PG, VF, LRP, RP, GV, GQ, NG, LR, VL, LL, FN,<br>QL, TV         | ACE inhibitor, antiamnestic, neuropeptide, antithrombotic, glucose<br>uptake stimulation, regulating the stomach mucosal membrane<br>activity, DPP-IV inhibitor     |
| YQQQTYPGFSN      | 1332.39 | 0.25 | 0.07 | Glutelin/G<br>lobulin | PG, YP, GF, YPG, TY, QQ, QT, YQ                                | ACE inhibitor, antioxidant, antiamnestic, antithrombotic, regulating<br>the stomach mucosal membrane activity, $\alpha$ -glucosidase inhibitor,<br>DPP-IV inhibitor |
| NGVLRPGQLLIHPQ   | 1517.83 | 0.32 | 0.25 | Glutelin/G<br>lobulin | PG, LRP, IP, RP, GV, GQ, NG, PQ, LR, VL, LI, II,<br>LL, QL, VL | ACE inhibitor, antiamnestic, neuropeptide, antithrombotic, glucose<br>uptake stimulation, regulating the stomach mucosal membrane<br>activity, DPP-IV inhibitor     |
| FDLNNNANQLEPR    | 1544.64 | 0.24 | 0.16 | Glutelin/G<br>lobulin | PR, LN, EP, NA, NN, NQ, QL                                     | ACE inhibitor, DPP-IV inhibitor                                                                                                                                     |
| NGVLRPGQLL       | 1066.27 | 0.41 | 0.51 | Glutelin/G<br>lobulin | PG, LRP, RP, GV, GQ, NG, LR, VL, LL, QL, VL                    | ACE inhibitor, antiamnestic, neuropeptide, antithrombotic, glucose<br>uptake stimulation, regulating the stomach mucosal membrane<br>activity, DPP-IV inhibitor     |
| TVFNGVLRPG       | 1059.23 | 0.24 | 0.31 | Glutelin/G<br>lobulin | PG, VF, LRP, RP, GV, NG, LR, VL, FN, TV                        | ACE inhibitor, antiamnestic, antithrombotic, glucose uptake<br>stimulation, regulating the stomach mucosal membrane activity,<br>DPP-IV inhibitor                   |
| QFLPEGQ          | 817.90  | 0.32 | 0.09 | Glutelin/G<br>lobulin | GQ, EG, LP, FLPE, FL, QF, PE                                   | ACE inhibitor, antioxidant, neuropeptide, $\alpha$ -glucosidase inhibitor,<br>DPP-IV inhibitor                                                                      |
| LYVFDINNNANQLEPR | 1920.11 | 0.20 | 0.13 | Glutelin              | LY, VF, PR, YV, EP, IN, NA, NN, NQ, QL                         | ACE inhibitor, antioxidant, DPP-IV inhibitor                                                                                                                        |
| VFDINNNANQLEPR   | 1643.78 | 0.24 | 0.13 | Glutelin              | VF, PR, EP, IN, NA, NN, NQ, QL                                 | ACE inhibitor, DPP-IV inhibitor                                                                                                                                     |
| YVFDINNNANQLEPR  | 1806.95 | 0.23 | 0.12 | Glutelin              | VF, PR, YV, EP, IN, NA, NN, NQ, QL                             | ACE inhibitor, DPP-IV inhibitor                                                                                                                                     |

|                          |         |      |      |                       |                                                                                         |                                                                                                                                                               |
|--------------------------|---------|------|------|-----------------------|-----------------------------------------------------------------------------------------|---------------------------------------------------------------------------------------------------------------------------------------------------------------|
| FDINNNANQLEPR            | 1544.64 | 0.25 | 0.12 | Glutelin              | PR, EP, IN, NA, NN, NQ, QL                                                              | ACE inhibitor, DPP-IV inhibitor                                                                                                                               |
| GLLVPRYSNTPGLV           | 1485.75 | 0.38 | 0.28 | Glutelin/G<br>lobulin | PG, RY, PRY, PR, PGL, VP, GL, TP, LV, LL, NT,<br>YS                                     | ACE inhibitor, antioxidant, antiamnesic, antithrombotic, glucose<br>uptake stimulation, regulating the stomach mucosal membrane<br>activity, DPP-IV inhibitor |
| RQNIDNPNLADTYNPR         | 1901.03 | 0.22 | 0.18 | Glutelin/G<br>lobulin | PR, LA, YN, NPR, TY, NP, AD, DN, NL, PN, QN                                             | ACE inhibitor, antioxidant, $\alpha$ -glucosidase inhibitor, DPP-IV inhibitor                                                                                 |
| QNIDNPNLADTYNPR          | 1744.84 | 0.30 | 0.13 | Glutelin/G<br>lobulin | PR, LA, YN, NPR, TY, NP, AD, DN, NL, PN, QN                                             | ACE inhibitor, antioxidant, $\alpha$ -glucosidase inhibitor, DPP-IV inhibitor                                                                                 |
| NIDNPNLADTYNPR           | 1616.71 | 0.24 | 0.12 | Glutelin/G<br>lobulin | PR, LA, YN, NPR, TY, NP, AD, DN, NL, PN, QN                                             | ACE inhibitor, antioxidant, $\alpha$ -glucosidase inhibitor, DPP-IV inhibitor                                                                                 |
| IKFPIV                   | 715.93  | 0.39 | 0.09 | Glutelin/G<br>lobulin | FP, KF, IV, PI                                                                          | ACE inhibitor, glucose uptake stimulation, DPP-IV inhibitor                                                                                                   |
| ITYLNGQKFPI              | 1293.53 | 0.20 | 0.10 | Glutelin/G<br>lobulin | FP, YL, GQ, NG, QK, KF, LN, TY, PI                                                      | ACE inhibitor, antioxidant, neuropeptide, DPP-IV inhibitor                                                                                                    |
| GLLLPHYSNGATLV           | 1454.69 | 0.39 | 0.18 | Glutelin/G<br>lobulin | HY, LLP, GA, GL, NG, PH, LP, LLL, LV, LL,<br>LLPH, PHY, AT, TL, YS                      | ACE inhibitor, antioxidant, antiinflammation, stimulating vasoactive<br>substance release, glucose uptake stimulation, DPP-IV inhibitor                       |
| NGQKFPI                  | 802.93  | 0.55 | 0.09 | Glutelin/G<br>lobulin | FP, GQ, NG, QK, KF, PI                                                                  | ACE inhibitor, neuropeptide, DPP-IV inhibitor                                                                                                                 |
| LQAFEPIRT                | 1074.24 | 0.49 | 0.17 | Glutelin/G<br>lobulin | IR, AF, LQ, FEP, EP, PI, QA                                                             | ACE inhibitor, antioxidant, DPP-IV inhibitor                                                                                                                  |
| IGQQLYRYE                | 1169.30 | 0.26 | 0.11 | Glutelin/G<br>lobulin | RY, LY, IG, GQ, YE, YR, YRY, QL, QQ                                                     | ACE inhibitor, antioxidant, neuropeptide, DPP-IV inhibitor                                                                                                    |
| IYNSANQLDPR              | 1290.40 | 0.30 | 0.11 | Glutelin/G<br>lobulin | IY, PR, YN, DP, NQ, QL                                                                  | ACE inhibitor, antioxidant, DPP-IV inhibitor                                                                                                                  |
| GLLLPHYSNGATLVYII<br>QGR | 2185.55 | 0.31 | 0.15 | Glutelin              | VY, HY, LLP, GA, GL, GR, QG, NG, PH, LVY, LP,<br>LLL, LV, II, LL, LLPH, PHY, AT, TL, YS | ACE inhibitor, antioxidant, antiinflammation, stimulating vasoactive<br>substance release, glucose uptake stimulation, DPP-IV inhibitor                       |

|                        |         |      |      |                       |                                                            |                                                                                           |
|------------------------|---------|------|------|-----------------------|------------------------------------------------------------|-------------------------------------------------------------------------------------------|
| GEEIGAFTPR             | 1076.17 | 0.37 | 0.09 | Glutelin/G<br>lobulin | PR, AF, IG, GA, GE, EI, TP, EE                             | ACE inhibitor, stimulating vasoactive substance release, DPP-IV<br>inhibitor              |
| NIENPNHADTYNPR         | 1654.72 | 0.20 | 0.10 | Glutelin/G<br>lobulin | PR, IE, YN, NPR, TY, AD, HA, NP, NH, PN                    | ACE inhibitor, antioxidant, $\alpha$ -glucosidase inhibitor, DPP-IV inhibitor             |
| SLKNNRGEEIGAFTPR       | 1788.98 | 0.24 | 0.18 | Glutelin/G<br>lobulin | PR, AF, IG, GA, GE, EI, TP, RG, EE, SL, LK, NN,<br>NR      | ACE inhibitor, antioxidant, stimulating vasoactive substance release,<br>DPP-IV inhibitor |
| VFDVNNNANQLEPR         | 1629.75 | 0.21 | 0.17 | Glutelin/G<br>lobulin | VF, PR, EP, NA, NN, NQ, QL, VF, VN                         | ACE inhibitor, DPP-IV inhibitor                                                           |
| EFFLAGKPR              | 1064.25 | 0.57 | 0.24 | Glutelin/G<br>lobulin | GKP, PR, FFL, LA, AG, GK, KP, EF, FF                       | ACE inhibitor, antioxidant, hypolipidemic, DPP-IV inhibitor                               |
| KNIDNPQSSDIFNPH        | 1725.83 | 0.31 | 0.06 | Glutelin/G<br>lobulin | IF, PQ, PH, NP, DN, FN, QS                                 | ACE inhibitor, DPP-IV inhibitor                                                           |
| NIDNPQSSDIFNPHGGR      | 1867.95 | 0.41 | 0.06 | Glutelin/G<br>lobulin | IF, GR, HG, GG, PQ, PH, PHG, NP, DN, FN, QS                | ACE inhibitor, antioxidant, DPP-IV inhibitor                                              |
| KNIDNPQSSDIFNPHGG<br>R | 1996.13 | 0.38 | 0.07 | Glutelin/G<br>lobulin | IF, GR, HG, GG, PQ, PH, PHG, NP, DN, FN, QS                | ACE inhibitor, antioxidant, DPP-IV inhibitor                                              |
| SVFDGELH               | 902.96  | 0.34 | 0.06 | Glutelin/G<br>lobulin | VF, GE, DG, LH, EL, SV                                     | ACE inhibitor, antioxidant, DPP-IV inhibitor                                              |
| SFGGSPLQSPR            | 1132.24 | 0.63 | 0.10 | Glutelin/G<br>lobulin | PR, PL, FG, GS, GG, SF, LQ, FGG, SP, QS                    | ACE inhibitor, DPP-IV inhibitor                                                           |
| ITRANSQNFILN           | 1487.68 | 0.24 | 0.13 | Glutelin/G<br>lobulin | FP, RA, NF, LN, IL, PI, QN, TR                             | ACE inhibitor, glucose uptake stimulation, DPP-IV inhibitor                               |
| FQVSMAQFSFGGSPLQS<br>P | 1915.15 | 0.45 | 0.08 | Glutelin/G<br>lobulin | PL, FG, GS, GG, SF, LQ, FQ, FGG, MA, SP, QF,<br>QS, QV, VS | ACE inhibitor, DPP-IV inhibitor                                                           |
| NQNIFAGFNPD            | 1349.47 | 0.60 | 0.07 | Globulin              | GF, IF, AG, FA, NP, FN, NQ, QN                             | ACE inhibitor, DPP-IV inhibitor                                                           |
| FRQGDIVALPT            | 1216.40 | 0.31 | 0.18 | Globulin              | FR, QG, GD, PT, ALP, LP, IV, VA, AL                        | ACE inhibitor, glucose uptake stimulation, DPP-IV inhibitor                               |

|             |         |      |      |                      |                                         |                                                                                                                                  |
|-------------|---------|------|------|----------------------|-----------------------------------------|----------------------------------------------------------------------------------------------------------------------------------|
| SIQQHFGQNI  | 1171.28 | 0.33 | 0.06 | Globulin             | FG, GQ, HF, IQ, QH, QN, QQ, SI          | ACE inhibitor, neuropeptide, DPP-IV inhibitor                                                                                    |
| YGEQQQQPGMT | 1266.35 | 0.23 | 0.10 | Globulin             | PG, YG, GM, GE, QP, QQ                  | ACE inhibitor, antiinflammation, antiamnesic, antithrombotic, regulating the stomach mucosal membrane activity, DPP-IV inhibitor |
| YGEQQQQPGM  | 1165.24 | 0.20 | 0.08 | Globulin             | PG, YG, GM, GE, QP, QQ                  | ACE inhibitor, antiinflammation, antiamnesic, antithrombotic, regulating the stomach mucosal membrane activity, DPP-IV inhibitor |
| ADEIGAFTPR  | 1076.17 | 0.48 | 0.11 | Glutelin             | PR, AF, IG, GA, EI, TP, AD              | ACE inhibitor, $\alpha$ -glucosidase inhibitor, DPP-IV inhibitor                                                                 |
| SFANQLEPR   | 1061.16 | 0.56 | 0.15 | Glutelin/Globulin    | PR, SF, FA, EP, NQ, QL                  | ACE inhibitor, DPP-IV inhibitor                                                                                                  |
| YGIYPR      | 767.88  | 0.70 | 0.09 | Prolamin             | IYP, IY, YPR, PR, IYPR, YG, YP, GI      | ACE inhibitor, antioxidant, antiinflammation, $\alpha$ -glucosidase inhibitor, DPP-IV inhibitor                                  |
| FRIPE       | 660.77  | 0.51 | 0.10 | Seed storage protein | IP, FR, RI, PE                          | ACE inhibitor, $\alpha$ -glucosidase inhibitor, DPP-IV inhibitor                                                                 |
| FQQGDVIAVPA | 1144.29 | 0.26 | 0.10 | Globulin             | AVP, IA, VP, QG, GD, AV, FQ, PA, QQ, VI | ACE inhibitor, DPP-IV inhibitor                                                                                                  |

<sup>a</sup>From PeptideRanker. <sup>b</sup>From CPPpred. <sup>c</sup>From ExPASy ProtParam. <sup>d</sup>From BIOPEP.

Table S5. Potential bioactive peptides in ByPP-mungbean protein.

| Peptide sequence  | MW      | PeptideRanker score <sup>a</sup> | CPPpred score <sup>b</sup> | Parent protein | Potential bioactive peptides <sup>d</sup>                       | Biological function <sup>d</sup>                                                                                                     |
|-------------------|---------|----------------------------------|----------------------------|----------------|-----------------------------------------------------------------|--------------------------------------------------------------------------------------------------------------------------------------|
| GQESQQEGVIVELKR   | 1699.88 | 0.21                             | 0.17                       | Globulin       | KR, GV, GQ, EG, VE, EL, LK, IV, ES, QE, QQ, VI                  | ACE inhibitor, antioxidant, neuropeptide, glucose uptake stimulation, $\alpha$ -glucosidase inhibitor, DPP-IV inhibitor              |
| FLSSTEAQQSYLQGFSK | 1921.09 | 0.21                             | 0.10                       | Globulin       | YL, GF, QG, EA, SY, TE, LQ, ST, FL, QQ, QS, SK                  | ACE inhibitor, neuropeptide (anxiolytic peptide), $\alpha$ -glucosidase inhibitor, DPP-IV inhibitor                                  |
| DSNILEQGH         | 1012.04 | 0.20                             | 0.06                       | Globulin       | GH, QG, IL                                                      | ACE inhibitor, glucose uptake stimulation, DPP-IV inhibitor                                                                          |
| KEGSLLLPHYNSKA    | 1556.78 | 0.37                             | 0.17                       | Globulin       | HY, LLP, GS, EG, KA, KE, PH, YN, LP, LLPH, PHY, LLL, LL, SL, SK | ACE inhibitor, antioxidant, antiinflammation, stimulating vasoactive substance release, glucose uptake stimulation, DPP-IV inhibitor |
| WFEITPEKNPQ       | 1388.54 | 0.23                             | 0.11                       | Globulin       | EI, PQ, EK, TP, PE, NP, WF, EI                                  | ACE inhibitor, $\alpha$ -glucosidase inhibitor, DPP-IV inhibitor                                                                     |
| AFGINAENNQRN      | 1347.41 | 0.20                             | 0.12                       | Globulin       | AF, GI, FG, AE, IN, NA, NN, NQ, RN                              | ACE inhibitor, DPP-IV inhibitor                                                                                                      |
| KSLSSEDQPFN       | 1251.32 | 0.30                             | 0.07                       | Globulin       | QP, SE, SL, DQ, FN, KS, PF                                      | ACE inhibitor, stimulating vasoactive substance release, DPP-IV inhibitor                                                            |
| LAVPVNNPHRFQD     | 1506.68 | 0.27                             | 0.18                       | Globulin       | AVP, RF, LA, VP, PH, AV, FQ, PHR, NP, HR, NN, PV, QD, VN        | ACE inhibitor, antioxidant, DPP-IV inhibitor                                                                                         |
| KEGSLLLPH         | 993.17  | 0.41                             | 0.21                       | Globulin       | LLP, GS, EG, KE, PH, LP, LLL, LL, LLPH, SL, EG                  | ACE inhibitor, antioxidant, stimulating vasoactive substance release, glucose uptake stimulation, DPP-IV inhibitor                   |
| NVISEIPTEV        | 1100.23 | 0.41                             | 0.07                       | Globulin       | IP, EI, EV, TE, PT, EIPT, SE, NV, TE, VI                        | ACE inhibitor, antibacterial, stimulating vasoactive substance release, DPP-IV inhibitor                                             |
| FLVNPDDNENLR      | 1445.55 | 0.41                             | 0.14                       | Globulin       | VNP, LR, NLR, LV, NEN, NP, FL, DN, NE, NL, VN                   | ACE inhibitor, antioxidant, stimulating vasoactive substance release, DPP-IV inhibitor                                               |
| KSLSSEDQPF        | 1137.21 | 0.29                             | 0.07                       | Globulin       | QP, SE, SL, DQ, KS, PF                                          | ACE inhibitor, stimulating vasoactive substance release, DPP-IV inhibitor                                                            |

|                   |         |      |      |          |                                                          |                                                                                                                                                     |
|-------------------|---------|------|------|----------|----------------------------------------------------------|-----------------------------------------------------------------------------------------------------------------------------------------------------|
| EGSLLLPH          | 865.00  | 0.50 | 0.13 | Globulin | LLP, GS, EG, PH, LP, LLL, LL, LLPH, SL                   | ACE inhibitor, antioxidant, stimulating vasoactive substance release, glucose uptake stimulation, DPP-IV inhibitor                                  |
| ASFDSDIKE         | 1011.05 | 0.31 | 0.06 | Globulin | SF, KE, AS                                               | ACE inhibitor, DPP-IV inhibitor                                                                                                                     |
| TLVNPDGRDSNILE    | 1542.67 | 0.23 | 0.12 | Globulin | GR, DG, VNP, IL, LV, NP, TL, VN                          | ACE inhibitor, glucose uptake stimulation, DPP-IV inhibitor                                                                                         |
| EGSLLLPHYNS       | 1229.35 | 0.28 | 0.08 | Globulin | HY, LLP, GS, EG, PH, YN, LP, LLL, LL, LLPH, PHY, SL      | ACE inhibitor, antioxidant, antiinflammation, stimulating vasoactive substance release, glucose uptake stimulation, DPP-IV inhibitor                |
| ILEQGHAQKIPAGTT   | 1563.77 | 0.20 | 0.16 | Globulin | IPA, IP, AG, GH, GT, QG, QK, IL, PA, HA, KI, TT          | ACE inhibitor, glucose uptake stimulation, DPP-IV inhibitor                                                                                         |
| EASFDSDIK         | 1011.05 | 0.27 | 0.06 | Globulin | EA, SF, AS                                               | ACE inhibitor, $\alpha$ -glucosidase inhibitor, DPP-IV inhibitor                                                                                    |
| TLVNPDGRDSNIL     | 1413.55 | 0.24 | 0.14 | Globulin | GR, DG, VNP, IL, LV, NP, TL, VN                          | ACE inhibitor, glucose uptake stimulation, DPP-IV inhibitor                                                                                         |
| SFDSDIKEI         | 1053.13 | 0.37 | 0.05 | Globulin | SF, EI, KE                                               | ACE inhibitor, DPP-IV inhibitor                                                                                                                     |
| FRNQFGHL          | 1018.14 | 0.75 | 0.13 | Globulin | FR, GH, HL, FG, NQ, QF, RN                               | ACE inhibitor, antioxidant, DPP-IV inhibitor                                                                                                        |
| AELSEDDVFIIPATYPV | 1879.09 | 0.22 | 0.07 | Globulin | VF, IPA, YP, IP, AEL, II, SE, EL, TY, PA, AE, AT, II, PV | ACE inhibitor, antioxidant, stimulating vasoactive substance release, glucose uptake stimulation, $\alpha$ -glucosidase inhibitor, DPP-IV inhibitor |
| SFDSDIKE          | 939.97  | 0.35 | 0.05 | Globulin | SF, KE                                                   | ACE inhibitor, DPP-IV inhibitor                                                                                                                     |
| DLDMFIR           | 909.07  | 0.76 | 0.10 | Globulin | IR, MF, DM                                               | ACE inhibitor, antioxidant, DPP-IV inhibitor                                                                                                        |
| AELSEDDVFIIPA     | 1418.56 | 0.27 | 0.06 | Globulin | VF, IPA, IP, AEL, II, SE, EL, PA, AE                     | ACE inhibitor, antioxidant, stimulating vasoactive substance release, glucose uptake stimulation, DPP-IV inhibitor                                  |
| FEITPEKNPQLRD     | 1586.76 | 0.22 | 0.14 | Globulin | EI, PQ, EK, TP, LR, KNPQLR, EITPEKNPQLR, PE, NP, QL      | ACE inhibitor, fatty acid synthase inhibitor, $\alpha$ -glucosidase inhibitor, DPP-IV inhibitor                                                     |
| EASFDSDIKE        | 1140.17 | 0.21 | 0.05 | Globulin | EA, SF, KE, AS                                           | ACE inhibitor, $\alpha$ -glucosidase inhibitor, DPP-IV inhibitor                                                                                    |
| FEITPEKNPQL       | 1315.49 | 0.23 | 0.11 | Globulin | EI, PQ, EK, TP, PE, NP, QL                               | ACE inhibitor, $\alpha$ -glucosidase inhibitor, DPP-IV inhibitor                                                                                    |
| MKEGSLLLPH        | 1124.36 | 0.30 | 0.19 | Globulin | LLP, GS, EG, KE, PH, LP, LLL, LL, LLPH, LP, SL, MK       | ACE inhibitor, antioxidant, stimulating vasoactive substance release, glucose uptake stimulation, DPP-IV inhibitor                                  |
| LAVPVNNPH         | 960.10  | 0.23 | 0.18 | Globulin | AVP, LA, VP, PH, AV, NP, NN, PV, VN                      | ACE inhibitor, DPP-IV inhibitor                                                                                                                     |
| GSLLLPH           | 735.88  | 0.61 | 0.19 | Globulin | LLP, GS, PH, LP, LLL, LL, LLPH, LP                       | ACE inhibitor, antioxidant, stimulating vasoactive substance release, glucose uptake stimulation, DPP-IV inhibitor                                  |



|                 |         |      |      |              |                                                                      |                                                                                                                                            |
|-----------------|---------|------|------|--------------|----------------------------------------------------------------------|--------------------------------------------------------------------------------------------------------------------------------------------|
| NALKPDHRVETDGGL | 1621.77 | 0.27 | 0.21 | Glycinin     | LKP, GL, GG, DG, KP, VE, LK, AL, ET, HR, NA, TD, VE                  | ACE inhibitor, antioxidant, $\alpha$ -glucosidase inhibitor, DPP-IV inhibitor                                                              |
| IHQSGPGHVIL     | 1157.34 | 0.40 | 0.07 | Glycinin     | PG, GP, GH, SG, IL, SGP, QSGP, HV, IH, QS, VI                        | ACE inhibitor, antiamnesic, antithrombotic, glucose uptake stimulation, regulating the stomach mucosal membrane activity, DPP-IV inhibitor |
| LAGNPDIEHPEAM   | 1393.53 | 0.42 | 0.08 | Glycinin     | LA, AG, EA, IE, HP, NP, EH, PE                                       | ACE inhibitor, $\alpha$ -glucosidase inhibitor, DPP-IV inhibitor                                                                           |
| YLAGNPDIEHPEA   | 1425.52 | 0.20 | 0.07 | Glycinin     | YL, LA, AG, EA, IE, HP, NP, EH, PE                                   | ACE inhibitor, neuropeptide, $\alpha$ -glucosidase inhibitor, DPP-IV inhibitor                                                             |
| VFDELSKGQ       | 1137.21 | 0.21 | 0.08 | Glycinin     | VF, KG, GQ, EL, SK                                                   | ACE inhibitor, antioxidant, neuropeptide, DPP-IV inhibitor                                                                                 |
| AGNPDIEHPEA     | 1149.18 | 0.26 | 0.06 | Glycinin     | AG, EA, IE, HP, NP, EH, PE                                           | ACE inhibitor, $\alpha$ -glucosidase inhibitor, DPP-IV inhibitor                                                                           |
| RNGLQMPSYSPY    | 1412.58 | 0.25 | 0.10 | Glycinin     | PSY, GL, NG, SY, LQ, PY, MP, SP, PS, RN, YS                          | ACE inhibitor, antiinflammation, DPP-IV inhibitor                                                                                          |
| IHQSGPGHVILIPR  | 1523.80 | 0.60 | 0.09 | Glycinin     | PG, GP, PR, IP, GH, SG, IL, SGP, QSGP, LI, HV, IH, QS, VI            | ACE inhibitor, antiamnesic, antithrombotic, glucose uptake stimulation, regulating the stomach mucosal membrane activity, DPP-IV inhibitor |
| EVEPLPPR        | 936.08  | 0.47 | 0.25 | Glycinin     | PLP, LPP, PR, PL, EV, VE, PP, LP, EP                                 | ACE inhibitor, $\alpha$ -glucosidase inhibitor, DPP-IV inhibitor                                                                           |
| EIEPLPPR        | 950.10  | 0.56 | 0.15 | Glycinin     | PLP, LPP, PR, PL, EI, IE, PP, IEP, LP, EP                            | ACE inhibitor, $\alpha$ -glucosidase inhibitor, DPP-IV inhibitor                                                                           |
| RAFPAEV         | 788.90  | 0.27 | 0.22 | Glycinin     | FP, AFP, AF, EV, PA, RA, AE                                          | ACE inhibitor, DPP-IV inhibitor                                                                                                            |
| VFDELSKG        | 1009.08 | 0.28 | 0.08 | Glycinin     | VF, KG, EL, SK                                                       | ACE inhibitor, antioxidant, DPP-IV inhibitor                                                                                               |
| FDDELSKGQ       | 1038.08 | 0.25 | 0.07 | Glycinin     | KG, GQ, EL, SK                                                       | ACE inhibitor, antioxidant, neuropeptide, DPP-IV inhibitor                                                                                 |
| LSKGQLL         | 757.93  | 0.37 | 0.44 | Glycinin     | KG, GQ, LL, QL, SK                                                   | ACE inhibitor, neuropeptide, glucose uptake stimulation, DPP-IV inhibitor                                                                  |
| AGNPDIEHPEAM    | 1280.37 | 0.45 | 0.07 | Glycinin     | AG, EA, IE, HP, NP, EH, PE                                           | ACE inhibitor, $\alpha$ -glucosidase inhibitor, DPP-IV inhibitor                                                                           |
| VQLNEGSIMGPHWNP | 1807.06 | 0.38 | 0.12 | Vicilin-like | GP, GS, MG, EG, LN, PH, MGP, PHW, NP, WN, HW, IM, NE, PK, QL, SI, VQ | ACE inhibitor, antioxidant, antiamnesic, antithrombotic, regulating the stomach mucosal membrane activity, DPP-IV inhibitor                |
| NEGSIMGPHWNP    | 1466.63 | 0.52 | 0.09 | Vicilin-like | GP, GS, MG, EG, PH, MGP, PHW, NP, WN, HW, IM, NE, PK, SI             | ACE inhibitor, antioxidant, antiamnesic, antithrombotic, regulating the stomach mucosal membrane activity, DPP-IV inhibitor                |

|            |         |      |      |         |                                         |                                                                  |
|------------|---------|------|------|---------|-----------------------------------------|------------------------------------------------------------------|
| YEAGVVPAPR | 1058.20 | 0.23 | 0.21 | Oleosin | PR, AP, VP, AG, GV, EA, PAP, YE, PA, VV | ACE inhibitor, $\alpha$ -glucosidase inhibitor, DPP-IV inhibitor |
|------------|---------|------|------|---------|-----------------------------------------|------------------------------------------------------------------|

<sup>a</sup>From PeptideRanker. <sup>b</sup>From CPPpred. <sup>c</sup>From ExPASy ProtParam. <sup>d</sup>From BIOPEP.

Table S6. Potential bioactive peptides in IPP-soy protein.

| Peptide sequence         | MW      | PeptideRanker<br>score <sup>a</sup> | CPPpred<br>sCore <sup>b</sup> | Parent<br>protein | Potential bioactive peptides <sup>d</sup>                      | Biological function <sup>d</sup>                                                                                           |
|--------------------------|---------|-------------------------------------|-------------------------------|-------------------|----------------------------------------------------------------|----------------------------------------------------------------------------------------------------------------------------|
| KTNDTPMIGTLAGANS<br>LL   | 1817.09 | 0.34                                | 0.22                          | Glycinin          | LA, IG, GA, AG, GT, TP, LL, SL, KT, MI, ND, PM,<br>TL, TN      | ACE inhibitor, glucose uptake stimulation, DPP-IV inhibitor                                                                |
| SIIDTNSLENQLDQMPR        | 1974.17 | 0.24                                | 0.10                          | Glycinin          | PR, II, SL, MP, DQ, NQ, QL, SI, TN                             | ACE inhibitor, glucose uptake stimulation, DPP-IV inhibitor                                                                |
| VSIIDTNSLENQLDQMP<br>RRF | 2376.67 | 0.27                                | 0.12                          | Glycinin          | RF, PR, RR, II, MP, SL, DQ, NQ, QL, SI, TN, VS                 | ACE inhibitor, glucose uptake stimulation, DPP-IV inhibitor                                                                |
| FLEHAFSVDKQIA            | 1504.71 | 0.22                                | 0.09                          | Glycinin          | IA, AF, HA, FL, EH, QI, SV, VD                                 | ACE inhibitor, DPP-IV inhibitor                                                                                            |
| NALPEEVIQHTFNLK          | 1752.99 | 0.25                                | 0.14                          | Glycinin          | EV, TF, ALP, LP, EE, LK, AL, FN, HT, IQ, NA, NL,<br>QH, VI, PE | ACE inhibitor, antioxidant, stimulating vasoactive substance release,<br>$\alpha$ -glucosidase inhibitor, DPP-IV inhibitor |
| NSLENQLDQMPPRF           | 1747.95 | 0.42                                | 0.20                          | Glycinin          | RF, PR, RR, MP, SL, DQ, NQ, QL                                 | ACE inhibitor, DPP-IV inhibitor                                                                                            |
| TPMIGTLAGANSLL           | 1358.62 | 0.39                                | 0.20                          | Glycinin          | LA, IG, GA, AG, GT, TP, LL, SL, MI, PM, TL                     | ACE inhibitor, glucose uptake stimulation, DPP-IV inhibitor                                                                |
| PFKFLVPPQESQKR           | 1701.00 | 0.41                                | 0.27                          | Glycinin          | VPP, KR, VP, QK, KF, PP, PQ, LV, FL, ES, KF, QE                | ACE inhibitor, antiinflammation, glucose uptake stimulation, $\alpha$ -<br>glucosidase inhibitor, DPP-IV inhibitor         |
| IIDTNSLENQLDQMPPR<br>F   | 2190.46 | 0.24                                | 0.13                          | Glycinin          | RF, PR, RR, II, MP, SL, DQ, NQ, QL, TN                         | ACE inhibitor, glucose uptake stimulation, DPP-IV inhibitor                                                                |
| NSIIYALNGRAL             | 1304.51 | 0.48                                | 0.14                          | Glycinin          | IY, RA, YA, GR, NG, LN, IY, II, AL, SI                         | ACE inhibitor, antioxidant, glucose uptake stimulation, DPP-IV<br>inhibitor                                                |
| KFLVPPQESQKRA            | 1527.79 | 0.24                                | 0.36                          | Glycinin          | VPP, KR, VP, RA, QK, KF, PP, PQ, LV, FL, ES,<br>QE, FL         | ACE inhibitor, antiinflammation, glucose uptake stimulation, $\alpha$ -<br>glucosidase inhibitor, DPP-IV inhibitor         |
| NANSIIYALNGRAL           | 1489.69 | 0.37                                | 0.15                          | Glycinin          | IY, RA, YA, GR, NG, LN, IY, II, AL, SI                         | ACE inhibitor, antioxidant, glucose uptake stimulation, DPP-IV<br>inhibitor                                                |
| TPMIGTLAGANSL            | 1245.46 | 0.21                                | 0.16                          | Glycinin          | LA, IG, GA, AG, GT, TP, SL, MI, PM, TL                         | ACE inhibitor, DPP-IV inhibitor                                                                                            |
| SLENQLDQMPR              | 1330.48 | 0.31                                | 0.16                          | Glycinin          | PR, SL, MP, DQ, NQ, QL                                         | ACE inhibitor, DPP-IV inhibitor                                                                                            |

|                         |         |      |      |          |                                                                      |                                                                                                                    |
|-------------------------|---------|------|------|----------|----------------------------------------------------------------------|--------------------------------------------------------------------------------------------------------------------|
| ARQIKNNNPFKFLVPPQ<br>ES | 2227.55 | 0.27 | 0.20 | Glycinin | VPP, VP, KF, AR, PP, PQ, LV, NP, FL, ES, NN,<br>QE, QI, FL           | ACE inhibitor, antiinflammation, glucose uptake stimulation, $\alpha$ -<br>glucosidase inhibitor, DPP-IV inhibitor |
| NALKPDNRIESEGL          | 1612.76 | 0.28 | 0.14 | Glycinin | LKP, GL, GG, EG, KP, IE, SE, LK, AL, DN, ES,<br>NA, NR, RI           | ACE inhibitor, antioxidant, stimulating vasoactive substance release,<br>DPP-IV inhibitor                          |
| NLKSQARQIKNNNPF         | 1900.13 | 0.31 | 0.26 | Glycinin | AR, LK, NP, KS, NL, NN, PF, QA, QI, QQ                               | ACE inhibitor, antioxidant, DPP-IV inhibitor                                                                       |
| DQMPRRFYLAGNQEQE<br>F   | 2129.33 | 0.41 | 0.20 | Glycinin | RF, PR, YL, FY, YLAGNQ, LA, AG, RR, EF,<br>YLAGNQEQE, MP, DQ, NQ, QE | ACE inhibitor, antioxidant, neuropeptide, hypolipidemic, DPP-IV<br>inhibitor                                       |
| KSQQARQIKNNNPFKF        | 1948.21 | 0.61 | 0.26 | Glycinin | KF, AR, NP, KS, NN, PF, QA, QI, QQ                                   | ACE inhibitor, DPP-IV inhibitor                                                                                    |
| ENQLDQMPR               | 1130.24 | 0.35 | 0.17 | Glycinin | PR, MP, DQ, NQ, QL                                                   | ACE inhibitor, DPP-IV inhibitor                                                                                    |
| SAEFGSLRKNAMEF          | 1457.67 | 0.78 | 0.14 | Glycinin | MF, FG, GS, LR, EF, SLR, SL, AE, NA, RK, EF                          | ACE inhibitor, hypolipidemic, DPP-IV inhibitor                                                                     |
| NSLENQLDQMPR            | 1444.58 | 0.24 | 0.15 | Glycinin | PR, SL, MP, SL, DQ, NQ, QL                                           | ACE inhibitor, DPP-IV inhibitor                                                                                    |
| ENQLDQMPRRF             | 1433.60 | 0.61 | 0.24 | Glycinin | RF, PR, RR, MP, DQ, NQ, QL                                           | ACE inhibitor, DPP-IV inhibitor                                                                                    |
| SAEFGSLRKNAME           | 1310.49 | 0.56 | 0.17 | Glycinin | FG, GS, LR, EF, SLR, SL, AE, NA, RK, EF                              | ACE inhibitor, hypolipidemic, DPP-IV inhibitor                                                                     |
| RKNAMFVPHYNLNA          | 1674.94 | 0.27 | 0.22 | Glycinin | MF, HY, VP, LN, PH, FVP, YN, YNL, PHY, FVPH,<br>NA, NL, RK           | ACE inhibitor, antioxidant, antiinflammation, DPP-IV inhibitor                                                     |
| NPFKFLVPPQES            | 1402.61 | 0.29 | 0.10 | Glycinin | VPP, VP, KF, PP, PQ, LV, NP, FL, ES, QE, FL                          | ACE inhibitor, antiinflammation, glucose uptake stimulation, $\alpha$ -<br>glucosidase inhibitor, DPP-IV inhibitor |
| QIKNNNPFKFLVPPQES<br>Q  | 2128.42 | 0.27 | 0.13 | Glycinin | VPP, VP, KF, PP, PQ, LV, NP, FL, ES, QE, QI, FL                      | ACE inhibitor, antiinflammation, glucose uptake stimulation, $\alpha$ -<br>glucosidase inhibitor, DPP-IV inhibitor |
| FEPPQQPQQRGQSSRPQ<br>DR | 2298.42 | 0.26 | 0.25 | Glycinin | RP, GQ, PQ, RG, QP, DR, EE, EP, QD, QQ, QS                           | ACE inhibitor, neuropeptide, stimulating vasoactive substance<br>release, DPP-IV inhibitor                         |
| FVPHYNLNANSI            | 1388.55 | 0.34 | 0.08 | Glycinin | HY, VP, LN, PH, FVP, YN, YNL, PHY, FVPH, NA,<br>NL, SI               | ACE inhibitor, antioxidant, antiinflammation, DPP-IV inhibitor                                                     |
| NALPEEVIQHTFNL          | 1624.81 | 0.28 | 0.10 | Glycinin | EV, TF, ALP, LP, EE, AL, FN, HT, IQ, NA, NL,<br>QH, VI, PE           | ACE inhibitor, stimulating vasoactive substance release, $\alpha$ -<br>glucosidase inhibitor, DPP-IV inhibitor     |

|                   |         |      |      |          |                                                                  |                                                                                                            |
|-------------------|---------|------|------|----------|------------------------------------------------------------------|------------------------------------------------------------------------------------------------------------|
| FREGDLIAVPTGVA    | 1444.65 | 0.25 | 0.16 | Glycinin | AVP, IA, VP, FR, GV, GD, TG, EG, PT, AV,<br>IAVPTGVA, LI, VA     | ACE inhibitor, glucose uptake stimulation, DPP-IV inhibitor                                                |
| NQLDQMPPRF        | 1304.49 | 0.75 | 0.32 | Glycinin | RF, PR, RR, MP, DQ, NQ, QL                                       | ACE inhibitor, DPP-IV inhibitor                                                                            |
| KGAIVTVKGGL       | 1042.29 | 0.42 | 0.38 | Glycinin | VK, GA, GL, KG, GG, AI, IV, TV, VT                               | ACE inhibitor, glucose uptake stimulation, DPP-IV inhibitor                                                |
| FREGDLIAVPT       | 1217.39 | 0.24 | 0.14 | Glycinin | AVP, IA, VP, FR, GD, EG, PT, AV, LI                              | ACE inhibitor, glucose uptake stimulation, DPP-IV inhibitor                                                |
| NANSIIYALNG       | 1149.27 | 0.31 | 0.08 | Glycinin | IY, YA, NG, LN, IY, II, AL, NA, SI                               | ACE inhibitor, antioxidant, glucose uptake stimulation, DPP-IV inhibitor                                   |
| GRVLIVPQNF        | 1142.37 | 0.42 | 0.19 | Glycinin | VLIVP, VP, GR, NF, PQ, VL, IV, LI, NF, QN                        | ACE inhibitor, glucose uptake stimulation, DPP-IV inhibitor                                                |
| PEEVIQHTFNL       | 1326.47 | 0.30 | 0.08 | Glycinin | EV, TF, EE, FN, HT, IQ, NL, QH, VI, PE                           | ACE inhibitor, stimulating vasoactive substance release, $\alpha$ -glucosidase inhibitor, DPP-IV inhibitor |
| TSLDFPALS WLRLSAE | 1806.05 | 0.53 | 0.27 | Glycinin | RL, FP, LSW, DF, WL, LR, SL, PA, AL, AE, SW,<br>TS, SWLRL, WLRL  | ACE inhibitor, antioxidant, antiinflammation, $\alpha$ -glucosidase inhibitor, DPP-IV inhibitor            |
| TNSLENQLDQMPPRF   | 1849.05 | 0.29 | 0.23 | Glycinin | RF, PR, RR, MP, SL, DQ, NQ, QL, TN                               | ACE inhibitor, DPP-IV inhibitor                                                                            |
| RKNAMFVPHYN       | 1376.60 | 0.28 | 0.18 | Glycinin | MF, HY, VP, PH, FVP, YN, PHY, FVPH, NA, RK                       | ACE inhibitor, antioxidant, antiinflammation, DPP-IV inhibitor                                             |
| NQLDQMPPR         | 1001.13 | 0.47 | 0.24 | Glycinin | PR, MP, DQ, NQ, QL                                               | ACE inhibitor, DPP-IV inhibitor                                                                            |
| GRVLIVPQNFVVA     | 1411.71 | 0.29 | 0.27 | Glycinin | VLIVP, VP, GR, NF, PQ, VL, IV, LI, VA, VV, QN                    | ACE inhibitor, glucose uptake stimulation, DPP-IV inhibitor                                                |
| REGDLIAVPTGVAV    | 1483.69 | 0.38 | 0.24 | Glycinin | AVP, AW, IA, VP, GV, GD, TG, EG, PT, AV,<br>IAVPTGVA, LI, VA, TG | ACE inhibitor, antioxidant, glucose uptake stimulation, DPP-IV inhibitor                                   |
| QIKNNNPFLVPPQES   | 2000.28 | 0.34 | 0.12 | Glycinin | VPP, VP, KF, PP, PQ, LV, NP, FL, ES, NN, PF, QE,<br>QI           | ACE inhibitor, antiinflammation, glucose uptake stimulation, PP-IV inhibitor                               |
| NSIIYALNGRA       | 1191.35 | 0.35 | 0.12 | Glycinin | IY, RA, YA, GR, NG, LN, IY, II, AL, SI                           | ACE inhibitor, antioxidant, glucose uptake stimulation, DPP-IV inhibitor                                   |
| IYIQQKGIFG        | 1223.44 | 0.47 | 0.06 | Glycinin | IY, IF, GI, KG, FG, GK, QG, IFG, IQ, QQ                          | ACE inhibitor, antioxidant, DPP-IV inhibitor                                                               |
| LRLSAEFGS         | 979.10  | 0.20 | 0.15 | Glycinin | RL, FG, GS, LR, EF, AE                                           | ACE inhibitor, hypolipidemic, DPP-IV inhibitor                                                             |
| VIQHTFNLK         | 1099.30 | 0.29 | 0.15 | Glycinin | TF, LK, FN, HT, IQ, NL, QH, VI                                   | ACE inhibitor, antioxidant, DPP-IV inhibitor                                                               |

|                         |         |      |      |          |                                                                             |                                                                                                                |
|-------------------------|---------|------|------|----------|-----------------------------------------------------------------------------|----------------------------------------------------------------------------------------------------------------|
| PALSWLRL                | 955.17  | 0.92 | 0.61 | Glycinin | RL, LSW, WL, LR, PA, AL, SW, SWLRL, WLRL                                    | ACE inhibitor, antioxidant, antiinflammation, $\alpha$ -glucosidase inhibitor, DPP-IV inhibitor                |
| LNANSIIYALNGRA          | 1489.69 | 0.27 | 0.15 | Glycinin | IY, RA, YA, GR, NG, LN, IY, II, AL, NA, SI                                  | ACE inhibitor, antioxidant, glucose uptake stimulation, DPP-IV inhibitor                                       |
| PFKFLVPPQESQ            | 1416.64 | 0.26 | 0.11 | Glycinin | VPP, VP, KF, PP, PQ, LV, FL, ES, PF, QE                                     | ACE inhibitor, antiinflammation, glucose uptake stimulation, $\alpha$ -glucosidase inhibitor, DPP-IV inhibitor |
| IAVPTGVAWW              | 1099.30 | 0.60 | 0.29 | Glycinin | AVP, AW, IA, VP, GV, TG, PT, AV, IAVPTGVA, TG                               | ACE inhibitor, antioxidant, DPP-IV inhibitor                                                                   |
| FEPPQQPQQRGQ            | 1471.55 | 0.21 | 0.14 | Glycinin | GQ, PQ, RG, QP, EE, EP, QQ                                                  | ACE inhibitor, neuropeptide, stimulating vasoactive substance release, DPP-IV inhibitor                        |
| TSLDFPAL                | 862.98  | 0.54 | 0.12 | Glycinin | FP, DF, SL, PA, AL, TS                                                      | ACE inhibitor, DPP-IV inhibitor                                                                                |
| LKSQQARQIKNNPF          | 1786.02 | 0.33 | 0.27 | Glycinin | AR, LK, NP, KS, NN, PF, QA, QI, QQ                                          | ACE inhibitor, antioxidant, DPP-IV inhibitor                                                                   |
| IYIQQGKGIF              | 1166.39 | 0.42 | 0.06 | Glycinin | IY, IF, GI, KG, GK, QG, IQ, QQ                                              | ACE inhibitor, antioxidant, DPP-IV inhibitor                                                                   |
| VPTGVAWWMYNNEDT<br>PV   | 1979.19 | 0.21 | 0.18 | Glycinin | MY, AW, YP, GV, TG, PT, TP, WM, YN, WMY, VA, NE, NN, PV                     | ACE inhibitor, antioxidant, DPP-IV inhibitor                                                                   |
| IQKLNALKPDNRIESEG<br>GL | 2095.38 | 0.33 | 0.18 | Glycinin | LKP, GL, GG, EG, QK, KL, KP, IE, LN, SE, LK, AL, DN, ES, IQ, LN, NA, NR, RI | ACE inhibitor, antioxidant, stimulating vasoactive substance release, DPP-IV inhibitor                         |
| TATSLDFPALSWLRLSA<br>E  | 1978.23 | 0.90 | 0.31 | Glycinin | RL, FP, LSW, DF, WL, LR, SL, PA, TA, AL, AE, AT, TS, SWLRL, WLRL            | ACE inhibitor, antioxidant, antiinflammation, $\alpha$ -glucosidase inhibitor, DPP-IV inhibitor                |
| TSLDFPALSWLRL           | 1518.78 | 0.36 | 0.34 | Glycinin | RL, FP, LSW, DF, WL, LR, SL, PA, TA, AL, AT, TS, SWLRL, WLRL                | ACE inhibitor, antioxidant, antiinflammation, $\alpha$ -glucosidase inhibitor, DPP-IV inhibitor                |
| GRVLIVPQ                | 881.09  | 0.21 | 0.34 | Glycinin | VLIVP, VP, GR, PQ, VL, IV, LI                                               | ACE inhibitor, glucose uptake stimulation, DPP-IV inhibitor                                                    |
| KTNDTPMIGT              | 1077.22 | 0.20 | 0.14 | Glycinin | IG, GT, TP, KT, MI, ND, PM, TN                                              | ACE inhibitor, DPP-IV inhibitor                                                                                |
| IQQGKGIFG               | 947.10  | 0.54 | 0.08 | Glycinin | IF, GI, KG, FG, GK, QG, IFG, IQ, QQ                                         | ACE inhibitor, DPP-IV inhibitor                                                                                |
| IAVPTGVAWWM             | 1230.49 | 0.80 | 0.28 | Glycinin | AVP, AW, IA, VP, GV, TG, PT, AV, WM, IAVPTGVA, TG                           | ACE inhibitor, antioxidant, DPP-IV inhibitor                                                                   |

|                          |         |      |      |          |                                                             |                                                                                                                |
|--------------------------|---------|------|------|----------|-------------------------------------------------------------|----------------------------------------------------------------------------------------------------------------|
| LNALPEEVIQHTFNL          | 1737.97 | 0.34 | 0.12 | Glycinin | EV, LN, TF, ALP, LP, EE, AL, FN, HT, IQ, NA, NL, QH, VI, PE | ACE inhibitor, stimulating vasoactive substance release, $\alpha$ -glucosidase inhibitor, DPP-IV inhibitor     |
| LKPDNRIESEGL             | 1427.58 | 0.26 | 0.13 | Glycinin | LKP, GL, GG, EG, KP, IE, SE, LK, ES, NR, RI                 | ACE inhibitor, antioxidant, stimulating vasoactive substance release, DPP-IV inhibitor                         |
| LQGENEGEDKGAIQTV<br>KGGL | 2014.22 | 0.31 | 0.16 | Glycinin | VK, GA, GL, KG, GE, GG, QG, AI, EG, LQ, IV, NE, TV, VT      | ACE inhibitor, glucose uptake stimulation, DPP-IV inhibitor                                                    |
| VLIVPQNFWVA              | 1198.47 | 0.23 | 0.18 | Glycinin | VLIVP, VP, NF, PQ, VL, IV, LI, VA, VV                       | ACE inhibitor, glucose uptake stimulation, DPP-IV inhibitor                                                    |
| IAVPTGVAV                | 913.08  | 0.33 | 0.23 | Glycinin | AVP, AW, IA, VP, GV, TG, PT, AV, IAVPTGVA                   | ACE inhibitor, antioxidant, DPP-IV inhibitor                                                                   |
| NNNPFKFLVPPQES           | 1630.82 | 0.29 | 0.11 | Glycinin | VPP, VP, KF, PP, PQ, LV, NP, FL, ES, NN, QE                 | ACE inhibitor, antiinflammation, glucose uptake stimulation, DPP-IV inhibitor                                  |
| FLEHAFSVD                | 1064.16 | 0.23 | 0.06 | Glycinin | AF, HA, FL, EH, SV, VD                                      | ACE inhibitor, DPP-IV inhibitor                                                                                |
| IKNNNPFKFLVPPQES         | 1872.15 | 0.28 | 0.12 | Glycinin | VPP, VP, KF, PP, PQ, LV, NP, FL, ES, NN, QE                 | ACE inhibitor, antiinflammation, glucose uptake stimulation, $\alpha$ -glucosidase inhibitor, DPP-IV inhibitor |
| VSFKTNDTPMIGTL           | 1523.76 | 0.32 | 0.13 | Glycinin | IG, GT, SF, TP, KT, MI, ND, PM, TL, TN, VS                  | ACE inhibitor, DPP-IV inhibitor                                                                                |
| TPMIGTLAGAN              | 1045.22 | 0.21 | 0.17 | Glycinin | LI, IG, GA, AG, GT, TP, MI, PM, TL                          | ACE inhibitor, DPP-IV inhibitor                                                                                |
| FLEHAFSVDKQIAK           | 1632.88 | 0.23 | 0.12 | Glycinin | IA, AF, IAK, HA, FL, EH, QI, SV, CD                         | ACE inhibitor, hypotensive, antibacterial, DPP-IV inhibitor                                                    |
| PFKFLVPPQES              | 1288.51 | 0.32 | 0.10 | Glycinin | VPP, VP, KF, PP, PQ, LV, FL, ES, NN, QE                     | ACE inhibitor, antiinflammation, glucose uptake stimulation, $\alpha$ -glucosidase inhibitor, DPP-IV inhibitor |
| VPHYNLNA                 | 927.03  | 0.34 | 0.12 | Glycinin | HY, VP, LN, PH, YN, YNL, PHY, NA, NL                        | ACE inhibitor, antioxidant, antiinflammation, DPP-IV inhibitor                                                 |
| IYALNGRA                 | 990.17  | 0.34 | 0.15 | Glycinin | IY, RA, YA, GR, NG, LN, IY, IL, AL                          | ACE inhibitor, antioxidant, glucose uptake stimulation, DPP-IV inhibitor                                       |
| NNPFKFLVPPQES            | 1516.72 | 0.29 | 0.10 | Glycinin | VPP, VP, KF, PP, PQ, LV, NP, FL, ES, NN, QE                 | ACE inhibitor, antiinflammation, glucose uptake stimulation, $\alpha$ -glucosidase inhibitor, DPP-IV inhibitor |
| FREGDLIAVPTGV            | 1373.57 | 0.27 | 0.15 | Glycinin | AVP, IA, VP, FR, GV, GD, TG, PT, AV, LI                     | ACE inhibitor, glucose uptake stimulation, DPP-IV inhibitor                                                    |
| IETWNPNNKPFQ             | 1487.63 | 0.39 | 0.12 | Glycinin | NK, KP, IE, FQ, KP, TW, NP, WN, ET, NN, PF, PN              | ACE inhibitor, antioxidant, DPP-IV inhibitor                                                                   |
| ATSLDFPAL                | 934.06  | 0.54 | 0.15 | Glycinin | FP, DF, SL, PA, AL, AT, TS                                  | ACE inhibitor, DPP-IV inhibitor                                                                                |

|                         |         |      |      |          |                                                                                    |                                                                                                                |
|-------------------------|---------|------|------|----------|------------------------------------------------------------------------------------|----------------------------------------------------------------------------------------------------------------|
| TSLDFPA                 | 749.82  | 0.41 | 0.09 | Glycinin | FP, DL, SL, PA, TS                                                                 | ACE inhibitor, DPP-IV inhibitor                                                                                |
| YIQQGKGIFG              | 1110.28 | 0.49 | 0.07 | Glycinin | IF, GI, KG, FG, GK, QG, IFG, IQ, QQ, YI                                            | ACE inhibitor, DPP-IV inhibitor                                                                                |
| NANSIIYAL               | 978.11  | 0.41 | 0.08 | Glycinin | IY, YA, IY, II, AL, NA, SI                                                         | ACE inhibitor, antioxidant, glucose uptake stimulation, DPP-IV inhibitor                                       |
| NNNPFKFLVPPQESQ         | 1758.95 | 0.24 | 0.11 | Glycinin | VPP, VP, KF, PP, PQ, LV, NP, FL, ES, NN, QE                                        | ACE inhibitor, antiinflammation, glucose uptake stimulation, $\alpha$ -glucosidase inhibitor, DPP-IV inhibitor |
| IYALNG                  | 762.90  | 0.30 | 0.07 | Glycinin | IY, YA, NG, LN, IY, II, AL, II                                                     | ACE inhibitor, antioxidant, glucose uptake stimulation, DPP-IV inhibitor                                       |
| TSLDFPALS               | 950.06  | 0.32 | 0.10 | Glycinin | FP, DF, PA, AL, SL, TS                                                             | ACE inhibitor, DPP-IV inhibitor                                                                                |
| IAVPTGVAWWMYNNE<br>DTPV | 2163.43 | 0.25 | 0.17 | Glycinin | AVP, MY, AW, IA, VP, GV, TG, PT, AV, TP, WM, YN, IAVPTGVA, WMY, VA, WW, NE, NN, PV | ACE inhibitor, antioxidant, DPP-IV inhibitor                                                                   |
| FREGDLIAVPTGVAW         | 1630.86 | 0.46 | 0.20 | Glycinin | AVP, AW, IA, VP, FR, GV, GD, TG, EG, PT, AV, IAVPTGVA, VA, IA                      | ACE inhibitor, antioxidant, glucose uptake stimulation, DPP-IV inhibitor                                       |
| AIVTVKGGL               | 857.06  | 0.21 | 0.32 | Glycinin | VK, GL, KG, GG, AL, IV, TV, VT                                                     | ACE inhibitor, glucose uptake stimulation, DPP-IV inhibitor                                                    |
| RSQSDNFEYV              | 1244.28 | 0.27 | 0.07 | Glycinin | NF, EY, YV, DN, QS                                                                 | ACE inhibitor, DPP-IV inhibitor                                                                                |
| KTNDTPMIGTL             | 1190.38 | 0.30 | 0.18 | Glycinin | IG, GT, TP, KT, MI, ND, PM, TL, TN                                                 | ACE inhibitor, DPP-IV inhibitor                                                                                |
| YVSFKTNDTPMIGT          | 1573.78 | 0.20 | 0.09 | Glycinin | IG, GT, SF, TP, YV, KT, MI, ND, PM, TL, TN, VS                                     | ACE inhibitor, DPP-IV inhibitor                                                                                |
| IYNFREGDL               | 1126.23 | 0.28 | 0.08 | Glycinin | IY, FR, GD, EG, NF, YN                                                             | ACE inhibitor, antioxidant, DPP-IV inhibitor                                                                   |
| ALNGRALI                | 826.99  | 0.27 | 0.38 | Glycinin | RA, GR, NG, LN, LI, AL                                                             | ACE inhibitor, glucose uptake stimulation, DPP-IV inhibitor                                                    |
| FREGDL                  | 735.79  | 0.43 | 0.13 | Glycinin | FR, GD, EG                                                                         | ACE inhibitor, DPP-IV inhibitor                                                                                |
| VLIVPQNFFVAA            | 1269.55 | 0.25 | 0.20 | Glycinin | VAA, VLIVP, VP, AA, NF, PQ, VL, IV, LI, VA, VV, QN, VL                             | ACE inhibitor, hypotensive, glucose uptake stimulation, DPP-IV inhibitor                                       |
| FLEHAFSVDKQ             | 1320.47 | 0.23 | 0.09 | Glycinin | AF, HA, FL, EH, SV, VD                                                             | ACE inhibitor, DPP-IV inhibitor                                                                                |
| IVPQNFFVAA              | 1057.26 | 0.25 | 0.14 | Glycinin | VAA, VP, AA, NF, PQ, IV, VA, VV, QN                                                | ACE inhibitor, hypotensive, glucose uptake stimulation, DPP-IV inhibitor                                       |



|                        |         |      |      |          |                                                                                       |                                                                                                                    |
|------------------------|---------|------|------|----------|---------------------------------------------------------------------------------------|--------------------------------------------------------------------------------------------------------------------|
| IAVPTGVAWWMYNNE<br>D   | 1866.08 | 0.34 | 0.14 | Glycinin | AVP, MY, AW, IA, VP, GV, TG, PT, AV, TP, WM,<br>YN, IAVPTGVA, WMY, VA, WW, NE, NN, PV | ACE inhibitor, antioxidant, DPP-IV inhibitor                                                                       |
| LIAVPTGVAW             | 1026.24 | 0.37 | 0.28 | Glycinin | AVP, AW, IA, VP, GV, TG, PT, AV, IAVPTGVA,<br>LI, VA                                  | ACE inhibitor, antioxidant, glucose uptake stimulation, DPP-IV<br>inhibitor                                        |
| IGTLAGANSLLNAL         | 1327.54 | 0.51 | 0.23 | Glycinin | LA, IG, GA, AG, GT, LN, LL, SL, AL, NA, TL                                            | ACE inhibitor, glucose uptake stimulation, DPP-IV inhibitor                                                        |
| ALKPDNRIESEGGL         | 1498.66 | 0.32 | 0.14 | Glycinin | LKP, GL, GG, EG, KP, IE, SE, LK, AL, DN, ES,<br>NR, RI                                | ACE inhibitor, antioxidant, stimulating vasoactive substance release,<br>DPP-IV inhibitor                          |
| AWWMYNNEDTPV           | 1525.66 | 0.33 | 0.13 | Glycinin | MY, AW, TP, WM, YN, WMY, WW, NE, NN, PV                                               | ACE inhibitor, antioxidant, DPP-IV inhibitor                                                                       |
| FVPHYNLNANSIIYALN<br>G | 2020.27 | 0.44 | 0.08 | Glycinin | IY, HY, VP, YA, NG, LN, PH, FVP, YN, IY, YNL,<br>II, PHY, FVPH, AL, NA, NL, SI        | ACE inhibitor, antioxidant, antiinflammation, glucose uptake<br>stimulation, DPP-IV inhibitor                      |
| LNALPEEVIQHTFN         | 1624.81 | 0.22 | 0.10 | Glycinin | EV, LN, TF, ALP, LP, EE, AL, FN, HT, IQ, NA,<br>QH, VI, PE                            | ACE inhibitor, stimulating vasoactive substance release, $\alpha$ -<br>glucosidase inhibitor, DPP-IV inhibitor     |
| NFREGDL                | 849.90  | 0.31 | 0.12 | Glycinin | FR, GD, EG, NF                                                                        | ACE inhibitor, DPP-IV inhibitor                                                                                    |
| NPFKFLVPPQE            | 1315.53 | 0.40 | 0.13 | Glycinin | VPP, VP, KF, PP, PQ, LV, NP, FL, PF                                                   | ACE inhibitor, antiinflammation, glucose uptake stimulation, $\alpha$ -<br>glucosidase inhibitor, DPP-IV inhibitor |
| TATSLDFPA              | 922.00  | 0.22 | 0.14 | Glycinin | FP, DF, SL, PA, TA, AT, TS                                                            | ACE inhibitor, DPP-IV inhibitor                                                                                    |
| QQGKGIF                | 776.89  | 0.60 | 0.09 | Glycinin | IF, GI, KG, GK, QG, QQ                                                                | ACE inhibitor, DPP-IV inhibitor                                                                                    |
| WMYNNEDT               | 1072.11 | 0.20 | 0.08 | Glycinin | MY, WM, YN, WMY, NE, NN                                                               | ACE inhibitor, antioxidant, DPP-IV inhibitor                                                                       |
| FVPHYNL                | 889.02  | 0.69 | 0.08 | Glycinin | HY, VP, PH, FVP, YN, YNL, PHY, FVPH, NL                                               | ACE inhibitor, antioxidant, antiinflammation, DPP-IV inhibitor                                                     |
| SQQARQIKNNNPF          | 1544.69 | 0.41 | 0.17 | Glycinin | AR, NP, NN, PF, QA, QI, QQ                                                            | ACE inhibitor, DPP-IV inhibitor                                                                                    |
| EPQQPQQRGQSSRPQ        | 1750.85 | 0.24 | 0.26 | Glycinin | RP, GQ, PQ, RG, QP, EP, QQ, QS                                                        | ACE inhibitor, neuropeptide, DPP-IV inhibitor                                                                      |
| IIYALNGRAL             | 1103.33 | 0.44 | 0.18 | Glycinin | IY, RA, YA, GR, NG, LN, IY, II, AL                                                    | ACE inhibitor, antioxidant, glucose uptake stimulation, DPP-IV<br>inhibitor                                        |
| KFLVPPQE               | 957.14  | 0.24 | 0.18 | Glycinin | VPP, VP, KF, PP, PQ, LV, FL, QE                                                       | ACE inhibitor, antiinflammation, glucose uptake stimulation, $\alpha$ -<br>glucosidase inhibitor, DPP-IV inhibitor |
| SWLRL                  | 673.81  | 0.88 | 0.68 | Glycinin | RL, WL, LR, SW, SWLRL, WLRL                                                           | ACE inhibitor, $\alpha$ -glucosidase inhibitor, DPP-IV inhibitor                                                   |

|                   |         |      |      |          |                                                        |                                                                           |
|-------------------|---------|------|------|----------|--------------------------------------------------------|---------------------------------------------------------------------------|
| AWWMYNNEDTPVV     | 1624.79 | 0.25 | 0.15 | Glycinin | MY, AW, TP, WM, YN, WMY, WW, NE, NN, PV                | ACE inhibitor, antioxidant, DPP-IV inhibitor                              |
| KNAMFVPHYNLNA     | 1518.75 | 0.39 | 0.15 | Glycinin | MF, HY, VP, LN, PH, FVP, YN, YNL, PHY, FVPH, NA, NL    | ACE inhibitor, antioxidant, antiinflammation, DPP-IV inhibitor            |
| FSVDKQIA          | 907.03  | 0.20 | 0.09 | Glycinin | IA, QI, SV, VD                                         | ACE inhibitor, DPP-IV inhibitor                                           |
| FVPHYNLNANS       | 1275.39 | 0.28 | 0.08 | Glycinin | HY, VP, LN, PH, FVP, YN, YNL, PHY, FVPH, NA, NL        | ACE inhibitor, antioxidant, antiinflammation, DPP-IV inhibitor            |
| RKNAMFVPHYTLNA    | 1661.94 | 0.20 | 0.26 | Glycinin | MF, HY, VP, LN, PH, FVP, YN, YNL, PHY, FVPH, NA, NL    | ACE inhibitor, antioxidant, antiinflammation, DPP-IV inhibitor            |
| LKLSAQYGSRLKNAME  | 1680.00 | 0.34 | 0.41 | Glycinin | LKL, YG, GS, KL, LR, SLR, SL, LK, NA, QY, RK           | ACE inhibitor, antioxidant, antiinflammation, DPP-IV inhibitor            |
| KTNDRPSIGNLAGANSL | 1841.05 | 0.52 | 0.21 | Glycinin | RP, LA, IG, GA, AG, DR, LL, SL, KT, ND, NL, PS, SI, TN | ACE inhibitor, glucose uptake stimulation, DPP-IV inhibitor               |
| KTNDRPSIGNLAGANSL | 1727.89 | 0.28 | 0.   | Glycinin | RP, LA, IG, GA, AG, DR, LL, SL, KT, ND, NL, PS, SI, TN | ACE inhibitor, DPP-IV inhibitor                                           |
| DRPSIGNLAGANS     | 1271.35 | 0.25 | 0.11 | Glycinin | RP, LA, IG, GA, AG, DR, NL, PS, SI                     | ACE inhibitor, DPP-IV inhibitor                                           |
| RPSIGNLAGANSLL    | 1382.58 | 0.62 | 0.18 | Glycinin | RP, LA, IG, GA, AG, LL, SL, NL, PS, SI                 | ACE inhibitor, glucose uptake stimulation, DPP-IV inhibitor               |
| KTNDRPSIGNLAGAN   | 1527.66 | 0.25 | 0.19 | Glycinin | RP, LA, IG, GA, AG, DR, LL, SL, KT, ND, NL, PS, SI, TN | ACE inhibitor, DPP-IV inhibitor                                           |
| RPSIGNLAGANSL     | 1269.42 | 0.37 | 0.16 | Glycinin | RP, LA, IG, GA, AG, SL, NL, PS, SI                     | ACE inhibitor, DPP-IV inhibitor                                           |
| KTNDRPSIGNL       | 1214.34 | 0.33 | 0.17 | Glycinin | RP, LA, IG, GA, AG, SL, NL, PS, SI                     | ACE inhibitor, DPP-IV inhibitor                                           |
| NRIESEGGF         | 1008.06 | 0.21 | 0.06 | Glycinin | GF, GG, EG, IE, SE, ES, NR, IR                         | ACE inhibitor, stimulating vasoactive substance release, DPP-IV inhibitor |
| AVAAKSQSDNFEYVSF  | 1762.89 | 0.25 | 0.08 | Glycinin | VAA, AA, NF, SF, EY, AV, YV, AA, VA, DN, KS, QS, VS    | ACE inhibitor, hypotensive, DPP-IV inhibitor                              |
| VSFKTNDRPSIGN     | 1434.57 | 0.23 | 0.11 | Glycinin | RP, IG, SF, DR, KT, ND, PS, SI, TN, VS                 | ACE inhibitor, DPP-IV inhibitor                                           |
| NLKSQQARQVKNNNPF  | 1973.18 | 0.21 | 0.32 | Glycinin | VK, AR, LK, NP, KS, NL, NN, PF, QA, QQ, QV             | ACE inhibitor, antioxidant, DPP-IV inhibitor                              |
| S                 |         |      |      |          |                                                        |                                                                           |

|                          |         |      |      |          |                                                                                 |                                                                                                                                        |
|--------------------------|---------|------|------|----------|---------------------------------------------------------------------------------|----------------------------------------------------------------------------------------------------------------------------------------|
| GKQQEEENECSNILSGF<br>APE | 2163.24 | 0.30 | 0.07 | Glycinin | FAP, AP, GF, GS, GK, SG, EG, IL, EEE, EE, FA,<br>NE, QE, QQ, PE                 | ACE inhibitor, stimulating vasoactive substance release, glucose uptake stimulation, $\alpha$ -glucosidase inhibitor, DPP-IV inhibitor |
| DRPSIGNLAGANSL           | 1497.67 | 0.70 | 0.15 | Glycinin | RP, LA, IG, GA, AG, DR, LL, SL, NL, PS, SI                                      | ACE inhibitor, glucose uptake stimulation, DPP-IV inhibitor                                                                            |
| LKEAFGVNM                | 1008.20 | 0.28 | 0.16 | Glycinin | AF, FG, GV, EA, KE, LK, NM, VN                                                  | ACE inhibitor, antioxidant, $\alpha$ -glucosidase inhibitor, DPP-IV inhibitor                                                          |
| NSIIYALNGRALVQ           | 1531.77 | 0.21 | 0.16 | Glycinin | IY, RA, YA, GR, NG, LN, LVQ, IY, LV, II, AL, SI,<br>VQ                          | ACE inhibitor, antioxidant, glucose uptake stimulation, DPP-IV inhibitor                                                               |
| KSQARQVKNNNPF            | 1893.09 | 0.49 | 0.22 | Glycinin | VK, SF, AR, NP, KS, NN, PF, QA, QQ, QV                                          | ACE inhibitor, DPP-IV inhibitor                                                                                                        |
| FLVPPQESQRR              | 1356.55 | 0.31 | 0.28 | Glycinin | VPP, VP, RR, PP, PQ, LV, FL, ES, QE                                             | ACE inhibitor, antiinflammation, glucose uptake stimulation, $\alpha$ -glucosidase inhibitor, DPP-IV inhibitor                         |
| YIQQGNGIF                | 1039.16 | 0.40 | 0.05 | Glycinin | IF, GI, QG, NG, IQ, QQ, YI                                                      | ACE inhibitor, DPP-IV inhibitor                                                                                                        |
| SSPDIYNPQAGSITTA         | 1621.72 | 0.48 | 0.07 | Glycinin | IY, AG, GS, ITT, PQ, YN, AGS, SP, NP, TA, QA,<br>SI, TT                         | ACE inhibitor, antioxidant, DPP-IV inhibitor                                                                                           |
| LKLSAQYGSL               | 1079.26 | 0.24 | 0.20 | Glycinin | LKL, YG, GS, KL, SL, LK, QY                                                     | ACE inhibitor, antioxidant, antiinflammation, DPP-IV inhibitor                                                                         |
| PALWLLKLS                | 1040.31 | 0.66 | 0.59 | Glycinin | LKL, LW, KL, WL, LL, LK, PA, AL                                                 | ACE inhibitor, antioxidant, glucose uptake stimulation, DPP-IV inhibitor                                                               |
| LKSQARQVKNNNPF           | 1859.07 | 0.24 | 0.32 | Glycinin | VK, AR, LK, NP, KS, NN, PF, QA, QQ, QV                                          | ACE inhibitor, antioxidant, DPP-IV inhibitor                                                                                           |
| SGAIVTVKGGLRVTA          | 1428.70 | 0.22 | 0.38 | Glycinin | VK, GA, GL, KG, GG, AI, SG, LR, IV, TA, VK, VT                                  | ACE inhibitor, glucose uptake stimulation, DPP-IV inhibitor                                                                            |
| SSPDIYNPQAGSITT          | 1550.64 | 0.48 | 0.06 | Glycinin | IY, AG, GS, ITT, PQ, YN, AGS, SP, NP, QA, SI, TT                                | ACE inhibitor, antioxidant, DPP-IV inhibitor                                                                                           |
| SGFAPEFLKEAFGV           | 1498.70 | 0.79 | 0.10 | Glycinin | FAP, AFF, AP, GF, FG, GV, SG, EA, KE, EF, LK,<br>FA, FL, AF, EA, PE             | ACE inhibitor, antioxidant, hypolipidemic, glucose uptake stimulation, $\alpha$ -glucosidase inhibitor, DPP-IV inhibitor               |
| FLKEAFGVN                | 1024.18 | 0.29 | 0.13 | Glycinin | AF, FG, GV, EA, KE, LK, FL, VN                                                  | ACE inhibitor, antioxidant, $\alpha$ -glucosidase inhibitor, DPP-IV inhibitor                                                          |
| SGFAPEFLKEAFGVNM<br>QIV  | 2084.42 | 0.84 | 0.09 | Glycinin | FAP, AFF, AP, GF, FG, GV, SG, EA, KE, MQ, NM,<br>QI, EF, LK, FA, FL, AF, EA, PE | ACE inhibitor, antioxidant, hypolipidemic, glucose uptake stimulation, $\alpha$ -glucosidase inhibitor, DPP-IV inhibitor               |
| FLVPPQESQRRRA            | 1427.63 | 0.29 | 0.31 | Glycinin | VPP, VP, RA, RR, PP, PQ, LV, FL, ES, QE                                         | ACE inhibitor, antiinflammation, glucose uptake stimulation, $\alpha$ -glucosidase inhibitor, DPP-IV inhibitor                         |
| IYIQQGNGIF               | 1152.32 | 0.36 | 0.05 | Glycinin | IY, IF, GI, QG, NG, IQ, QQ, YI                                                  | ACE inhibitor, antioxidant, DPP-IV inhibitor                                                                                           |

|                       |         |      |      |          |                                                             |                                                                                                                |
|-----------------------|---------|------|------|----------|-------------------------------------------------------------|----------------------------------------------------------------------------------------------------------------|
| PHYTLNANSIIYAL        | 1589.81 | 0.29 | 0.09 | Glycinin | IY, HY, YA, LN, PH, IY, IL, PHY, AL, YT, SI, TL             | ACE inhibitor, antioxidant, antiinflammation, glucose uptake stimulation, DPP-IV inhibitor                     |
| RPSIGNL               | 755.87  | 0.52 | 0.15 | Glycinin | RP, IG, NL, PS, SI                                          | ACE inhibitor, DPP-IV inhibitor                                                                                |
| KEAFGVNM              | 895.04  | 0.30 | 0.12 | Glycinin | AF, FG, GV, EA, KE, NM, VN                                  | ACE inhibitor, DPP-IV inhibitor                                                                                |
| VPHYTLNA              | 914.03  | 0.23 | 0.15 | Glycinin | HY, VP, LN, PH, PHY, YT, NA, TL                             | ACE inhibitor, antioxidant, antiinflammation, DPP-IV inhibitor                                                 |
| FAVAAKSQSDNFE         | 1413.51 | 0.21 | 0.09 | Glycinin | VAA, AA, NF, AV, VA, FA, DN, KS, QS, FA                     | ACE inhibitor, hypotensive, DPP-IV inhibitor                                                                   |
| WLLKL                 | 671.88  | 0.75 | 0.80 | Glycinin | LKL, KL, WL, LL, LK                                         | ACE inhibitor, antioxidant, glucose uptake stimulation, DPP-IV inhibitor                                       |
| SIGNLAGANSL           | 1129.28 | 0.54 | 0.12 | Glycinin | LA, IG, GA, AG, LL, SL, NL, SI                              | ACE inhibitor, glucose uptake stimulation, DPP-IV inhibitor                                                    |
| KTNDRPSIGNLAGA        | 1413.55 | 0.24 | 0.20 | Glycinin | RP, LA, IG, GA, AG, DR, KT, ND, NL, PS, SI, TN              | ACE inhibitor, DPP-IV inhibitor                                                                                |
| VPHYTLN               | 842.95  | 0.35 | 0.13 | Glycinin | HY, VP, LN, PH, PHY, YT, TL                                 | ACE inhibitor, antioxidant, antiinflammation, DPP-IV inhibitor                                                 |
| KNNNPFSFLVPP          | 1373.57 | 0.74 | 0.11 | Glycinin | VPP, VP, SF, PP, LV, NP, FL, NN, PF                         | ACE inhibitor, antiinflammation, glucose uptake stimulation, $\alpha$ -glucosidase inhibitor, DPP-IV inhibitor |
| YVSFKTNDRPSIGNL       | 1710.91 | 0.31 | 0.12 | Glycinin | RP, IG, SF, YV, DR, KT, ND, NL, PS, SI, TN, VS              | ACE inhibitor, DPP-IV inhibitor                                                                                |
| QEIIYQQGNGIFGM        | 1597.81 | 0.63 | 0.06 | Glycinin | IY, IF, GI, GM, FG, QG, NG, IFG, EI, IQ, NG, QE, QQ         | ACE inhibitor, antioxidant, DPP-IV inhibitor                                                                   |
| YIQQGNGIFG            | 1096.21 | 0.48 | 0.05 | Glycinin | IF, GI, FG, QG, NG, IFG, IQ, QQ, YI                         | ACE inhibitor, DPP-IV inhibitor                                                                                |
| TATSLDFPALWLLKLSA     | 1847.18 | 0.52 | 0.42 | Glycinin | LKL, LW, FP, KL, DF, WL, LL, SL, LK, PA, AL, AT, TS         | ACE inhibitor, antioxidant, glucose uptake stimulation, DPP-IV inhibitor                                       |
| PFSFLVPPQESQR         | 1531.73 | 0.40 | 0.11 | Glycinin | VPP, VP, SF, PP, PQ, LV, FL, ES                             | ACE inhibitor, antiinflammation, glucose uptake stimulation, DPP-IV inhibitor                                  |
| PSIGNLAGANSLNALP<br>E | 1750.97 | 0.64 | 0.14 | Glycinin | LA, IG, GA, AG, LN, ALP, LP, LL, SL, LN, NA, NL, PS, SI, PE | ACE inhibitor, glucose uptake stimulation, $\alpha$ -glucosidase inhibitor, DPP-IV inhibitor                   |
| QNSSPDIYNPQAGSI       | 1590.67 | 0.32 | 0.06 | Glycinin | IY, AG, GS, PQ, YN, AGS, SP, NP, QA, QN, SI                 | ACE inhibitor, antioxidant, DPP-IV inhibitor                                                                   |
| EAFGVNMQIVRN          | 1490.74 | 0.35 | 0.16 | Glycinin | IVR, AF, FG, GV, EA, VR, IV, MQ, NL, NM, QI, RN, VN         | ACE inhibitor, glucose uptake stimulation, $\alpha$ -glucosidase inhibitor, DPP-IV inhibitor                   |

|                          |         |      |      |                 |                                                                      |                                                                                                                                                                                           |
|--------------------------|---------|------|------|-----------------|----------------------------------------------------------------------|-------------------------------------------------------------------------------------------------------------------------------------------------------------------------------------------|
| PQAGSITTATSLDFPA         | 1576.72 | 0.23 | 0.13 | Glycinin        | FP, AG, GS, ITT, PQ, DF, AGS, SL, PA, TA, AT, QA, SI, TS, TT         | ACE inhibitor, DPP-IV inhibitor                                                                                                                                                           |
| LAFPGSAQAVEKLLKN<br>QRES | 2186.50 | 0.21 | 0.35 | Conglycin<br>in | PG, FP, AFP, AF, LA, GS, KL, VE, EK, AV, LL, LK, LAF, ES, NQ, QA     | ACE inhibitor, antioxidant, antiamnestic, antithrombotic, glucose uptake stimulation, regulating the stomach mucosal membrane activity, $\alpha$ -glucosidase inhibitor, DPP-IV inhibitor |
| RSRDPPIYSNKLKGF          | 1680.93 | 0.65 | 0.19 | Conglycin<br>in | IY, GK, LG, NKL, KF, KL, NK, DP, PI, YS                              | ACE inhibitor, antioxidant, DPP-IV inhibitor                                                                                                                                              |
| LAFPGSAQAVEKLLKN<br>QRE  | 2099.42 | 0.31 | 0.41 | Conglycin<br>in | PG, FP, AFP, AF, LA, GS, KL, VE, EK, AV, LL, LK, LAF, ES, NQ, GQ, QA | ACE inhibitor, antioxidant, antiamnestic, antithrombotic, glucose uptake stimulation, regulating the stomach mucosal membrane activity, $\alpha$ -glucosidase inhibitor, DPP-IV inhibitor |
| NQRSPQLQNLRDYRILE        | 2143.39 | 0.25 | 0.29 | Conglycin<br>in | LQ, PQ, DY, IL, LR, NLR, YR, RDY, SP, NL, NQ, QL, QN, RI             | ACE inhibitor, antioxidant, neuropeptide, glucose uptake stimulation, DPP-IV inhibitor                                                                                                    |
| FAIGINAENNQRN            | 1460.57 | 0.22 | 0.10 | Conglycin<br>in | IG, GI, AI, IGINAENNQRN, FA, AE, IN, NA, NN, NQ, RN                  | ACE inhibitor, antioxidant, DPP-IV inhibitor                                                                                                                                              |
| QRFNQRSPQLQNLRD          | 1900.09 | 0.28 | 0.44 | Conglycin<br>in | RF, FNQ, LQ, PQ, LR, NLR, SP, FN, NL, NQ, QL, QN                     | ACE inhibitor, DPP-IV inhibitor                                                                                                                                                           |
| YVVNPDNNENLRL            | 1559.70 | 0.34 | 0.18 | Conglycin<br>in | RL, VNP, YV, LR, NLR, NEN, VV, NP, DN, NE, NL, NN, RL, VN, YV        | ACE inhibitor, antioxidant, DPP-IV inhibitor                                                                                                                                              |
| PIYSNKLKGF               | 1166.39 | 0.77 | 0.11 | Conglycin<br>in | IY, GK, LG, NKL, KF, KL, NK, PI, YS                                  | ACE inhibitor, antioxidant, DPP-IV inhibitor                                                                                                                                              |
| RLQSGDALRVPSGTTY         | 1720.90 | 0.21 | 0.28 | Conglycin<br>in | RL, VP, DA, GT, SG, GD, LQ, LR, TY, VP, AL, PS, QS, TT, TY, RV, DA   | ACE inhibitor, antioxidant, DPP-IV inhibitor                                                                                                                                              |
| ITLAIPVNKPGRF            | 1425.74 | 0.57 | 0.21 | Conglycin<br>in | PG, RF, AIP, IP, LA, GR, AI, NK, KP, PV, TL, VN                      | ACE inhibitor, antioxidant, antiamnestic, antithrombotic, regulating the stomach mucosal membrane activity, DPP-IV inhibitor                                                              |
| RLQSGDALRVPSGT           | 1456.62 | 0.27 | 0.35 | Conglycin<br>in | RL, VP, DA, GT, SG, GD, LQ, LR, VP, AL, PS, QS                       | ACE inhibitor, DPP-IV inhibitor                                                                                                                                                           |

|                          |         |      |      |                 |                                                                                        |                                                                                                                                                                                                 |
|--------------------------|---------|------|------|-----------------|----------------------------------------------------------------------------------------|-------------------------------------------------------------------------------------------------------------------------------------------------------------------------------------------------|
| NEGALLLPHFNSKA           | 1510.71 | 0.56 | 0.16 | Conglycin<br>in | LLP, GA, EG, KA, PH, LP, LLL, LL, LLPH, PHF,<br>LP, AL, EG, FN, HF, NE, PH, SK         | ACE inhibitor, antioxidant, stimulating vasoactive substance release,<br>glucose uptake stimulation, DPP-IV inhibitor                                                                           |
| LSIVDMNEGALLLPHFN<br>SKA | 2169.52 | 0.54 | 0.13 | Conglycin<br>in | LLP, GA, EG, KA, PH, DM, LP, LLL, LL, IV,<br>LLPH, PHF, LP, AL, EG, FN, HF, NE, PH, SK | ACE inhibitor, antioxidant, stimulating vasoactive substance release,<br>glucose uptake stimulation, DPP-IV inhibitor                                                                           |
| FNSKPNTLLLPNHADA         | 1751.96 | 0.24 | 0.17 | Conglycin<br>in | LLP, DA, KP, LP, LLL, LL, HA, AD, FN, NH, NT,<br>PN, SK, TL                            | ACE inhibitor, antioxidant, stimulating vasoactive substance release,<br>glucose uptake stimulation, $\alpha$ -glucosidase inhibitor, DPP-IV inhibitor                                          |
| KFFEITPEKNPQLRDLD        | 2090.36 | 0.23 | 0.15 | Conglycin<br>in | KF, EI, PQ, EK, TP, LR, FF, KNPQLR,<br>EITPEKNPQLR, NP, EI, QL, PE, LR                 | ACE inhibitor, fatty acid synthase inhibitor, $\alpha$ -glucosidase inhibitor,<br>DPP-IV inhibitor                                                                                              |
| YRILEFNSKPN              | 1380.57 | 0.22 | 0.12 | Conglycin<br>in | KP, LEF, IL, EF, YR, FN, PN, RI, SK                                                    | ACE inhibitor, antioxidant, hypolipidemic, neuropeptide, glucose<br>uptake stimulation, DPP-IV inhibitor                                                                                        |
| FEITPEKNPQLRDLDI         | 1928.17 | 0.20 | 0.12 | Conglycin<br>in | EI, PQ, EK, TP, LR, KNPQLR, EITPEKNPQLR,<br>NP, EI, QL, PE, LR                         | ACE inhibitor, fatty acid synthase inhibitor, $\alpha$ -glucosidase inhibitor,<br>DPP-IV inhibitor                                                                                              |
| ITLAIPVKNKGRFESF         | 1789.11 | 0.40 | 0.13 | Conglycin<br>in | PG, RF, AIP, IP, LA, GR, AI, NK, KP, PV, TL, VN                                        | ACE inhibitor, antioxidant, antiamnestic, antithrombotic, regulating<br>the stomach mucosal membrane activity, DPP-IV inhibitor                                                                 |
| LAFPGSAQAVEKLLK          | 1571.88 | 0.40 | 0.39 | Conglycin<br>in | PG, FP, AFP, AF, LA, GS, KL, VE, EK, AV, LL,<br>LK, LAF, ES, NQ, GQ, QA                | ACE inhibitor, antioxidant, antiamnestic, antithrombotic, glucose<br>uptake stimulation, regulating the stomach mucosal membrane<br>activity, $\alpha$ -glucosidase inhibitor, DPP-IV inhibitor |
| FEITPEKNPQLR             | 1471.68 | 0.31 | 0.17 | Conglycin<br>in | EI, PQ, EK, TP, LR, KNPQLR, EITPEKNPQLR,<br>NP, EI, QL, PE                             | ACE inhibitor, fatty acid synthase inhibitor, $\alpha$ -glucosidase inhibitor,<br>DPP-IV inhibitor                                                                                              |
| VLQRFNQRSPQLQNLR<br>D    | 2112.38 | 0.20 | 0.49 | Conglycin<br>in | RF, FNQ, LQ, PQ, LR, NLR, VL, SP, FN, NL, NQ,<br>QL, QN                                | ACE inhibitor, glucose uptake stimulation, DPP-IV inhibitor                                                                                                                                     |
| FNSKPNTLLLPNHADA<br>D    | 1867.05 | 0.23 | 0.15 | Conglycin<br>in | LLP, DA, KP, LP, LL, LLL, HA, AD, FN, NH, NT,<br>PN, SK, TL                            | ACE inhibitor, antioxidant, stimulating vasoactive substance release,<br>glucose uptake stimulation, $\alpha$ -glucosidase inhibitor, DPP-IV inhibitor                                          |
| FEITPEKNPQLRDLDIF        | 2075.35 | 0.35 | 0.11 | Conglycin<br>in | IF, EI, PQ, EK, TP, LR, KNPQLR, EITPEKNPQLR,<br>NP, EI, QL, PE                         | ACE inhibitor, fatty acid synthase inhibitor, $\alpha$ -glucosidase inhibitor,<br>DPP-IV inhibitor                                                                                              |

|                        |         |      |      |                 |                                                                                |                                                                                                                                 |
|------------------------|---------|------|------|-----------------|--------------------------------------------------------------------------------|---------------------------------------------------------------------------------------------------------------------------------|
| GALLLPHFNS             | 1068.24 | 0.49 | 0.13 | Conglycin<br>in | LLP, GA, PH, LP, LLL, LL, LLPH, PHF, AL, FN,<br>HF                             | ACE inhibitor, antioxidant, stimulating vasoactive substance release,<br>glucose uptake stimulation, DPP-IV inhibitor           |
| AELSEQDIFVIPA          | 1431.61 | 0.23 | 0.07 | Conglycin<br>in | IPA, IP, IF, AEL, SE, EL, PA, AE, QD, VI                                       | ACE inhibitor, antioxidant, stimulating vasoactive substance release,<br>DPP-IV inhibitor                                       |
| RAELSEQDIFVIPAGYP<br>V | 2004.27 | 0.24 | 0.10 | Conglycin<br>in | IPA, GY, YP, IP, RA, IF, AG, AEL, SE, VIPAGYP,<br>EL, PAGY, PA, AE, PV, QD, VI | ACE inhibitor, antioxidant, stimulating vasoactive substance release,<br>$\alpha$ -glucosidase inhibitor, DPP-IV inhibitor      |
| YRILEFNSKPNT           | 1481.67 | 0.20 | 0.13 | Conglycin<br>in | KP, LEF, IL, EF, YP, FN, NT, PN, RI, SK                                        | ACE inhibitor, antioxidant, hypolipidemic, neuropeptide, glucose<br>uptake stimulation, DPP-IV inhibitor                        |
| LLLPHFNSKA             | 1139.36 | 0.39 | 0.21 | Conglycin<br>in | LLP, KA, PH, LP, LLL, LL, LLPH, PHF, FN, HF,<br>SK                             | ACE inhibitor, antioxidant, stimulating vasoactive substance release,<br>glucose uptake stimulation, DPP-IV inhibitor           |
| RSRDPIYSNKLK           | 1405.58 | 0.42 | 0.17 | Conglycin<br>in | IY, LG, NKL, KL, NK, IY, DP, PI, YS                                            | ACE inhibitor, antioxidant, DPP-IV inhibitor                                                                                    |
| ITLAIPVKNKGRFES        | 1641.93 | 0.23 | 0.15 | Conglycin<br>in | PG, RF, AIP, IP, LA, GR, AI, NK, KP, PV, ES, TL,<br>VN                         | ACE inhibitor, antioxidant, anti-amnesic, antithrombotic, regulating<br>the stomach mucosal membrane activity, DPP-IV inhibitor |
| MNEGALLLPHF            | 1241.47 | 0.57 | 0.13 | Conglycin<br>in | LLP, GA, EG, PH, LP, LLL, LL, LLPH, PHF, HF,<br>MN, NE                         | ACE inhibitor, antioxidant, stimulating vasoactive substance release,<br>glucose uptake stimulation, DPP-IV inhibitor           |
| YVVNPDNNENLRLIT        | 1773.96 | 0.21 | 0.16 | Conglycin<br>in | RL, VNP, YV, LR, NLR, LI, NEN, VV, NP, DN,<br>NE, NL, NN, VN                   | ACE inhibitor, antioxidant, glucose uptake stimulation, DPP-IV<br>inhibitor                                                     |
| FAIGINAENNQRNFL        | 1720.91 | 0.43 | 0.11 | Conglycin<br>in | IG, GI, AI, NF, IGINAENNQRN, FA, FL, AE, IN,<br>NA, NN, NQ, RN                 | ACE inhibitor, antioxidant, DPP-IV inhibitor                                                                                    |
| NLRSRDPIYSNKLK         | 1632.84 | 0.25 | 0.19 | Conglycin<br>in | IY, LG, NKL, KL, NK, LR, NLR, DP, NL, PI, YS                                   | ACE inhibitor, antioxidant, DPP-IV inhibitor                                                                                    |
| LSIVDMNEGALLLPH        | 1621.91 | 0.39 | 0.12 | Conglycin<br>in | LLP, GA, EG, PH, DM, LP, LLL, IV, LL, LLPH,<br>AL, EG, MN, NE, SI, VD          | ACE inhibitor, antioxidant, stimulating vasoactive substance release,<br>glucose uptake stimulation, DPP-IV inhibitor           |
| LRSRDPIYSNKLK          | 1518.74 | 0.30 | 0.20 | Conglycin<br>in | IY, LG, NKL, KL, NK, LR, DP, PI, YS                                            | ACE inhibitor, antioxidant, DPP-IV inhibitor                                                                                    |

|                          |         |      |      |                 |                                                                          |                                                                                                                                                                   |
|--------------------------|---------|------|------|-----------------|--------------------------------------------------------------------------|-------------------------------------------------------------------------------------------------------------------------------------------------------------------|
| LAIPVKNKGRFES            | 1427.67 | 0.42 | 0.16 | Conglycin<br>in | PG, RF, AIP, IP, LA, GR, AI, NK, KP, PV, ES, VN                          | ACE inhibitor, antioxidant, antiamnestic, antithrombotic, regulating the stomach mucosal membrane activity, DPP-IV inhibitor                                      |
| SIVDMNEGALLLPH           | 1508.75 | 0.51 | 0.10 | Conglycin<br>in | LLP, GA, EG, PH, DM, LP, LLL, IV, LL, LLPH, AL, EG, MN, NE, SI, VD       | ACE inhibitor, antioxidant, stimulating vasoactive substance release, glucose uptake stimulation, DPP-IV inhibitor                                                |
| FNSKPNTLLLPNHADA<br>DYL  | 2143.38 | 0.39 | 0.15 | Conglycin<br>in | YL, LLP, DA, KP, DY, LP, LLL, LL, YL, DY, HA, AD, FN, NH, NT, PN, SK, TL | ACE inhibitor, antioxidant, neuropeptide, stimulating vasoactive substance release, glucose uptake stimulation, $\alpha$ -glucosidase inhibitor, DPP-IV inhibitor |
| FEITPEKNPQLRD            | 1586.76 | 0.22 | 0.14 | Conglycin<br>in | EI, PQ, EK, TP, LR, KNPQLR, EITPEKNPQLR, NP, QL, PE                      | ACE inhibitor, fatty acid synthase inhibitor, $\alpha$ -glucosidase inhibitor, DPP-IV inhibitor                                                                   |
| ISKEQIRALSKRA            | 1499.78 | 0.22 | 0.33 | Conglycin<br>in | IR, IRA, KR, RA, KE, AL, QI, SK                                          | ACE inhibitor, antioxidant, DPP-IV inhibitor                                                                                                                      |
| RLQSGDALRVPSGTT          | 1557.73 | 0.23 | 0.37 | Conglycin<br>in | RL, VP, DA, GT, SG, GD, LQ, LR, VP, AL, PS, QS, TT                       | ACE inhibitor, DPP-IV inhibitor                                                                                                                                   |
| EITPEKNPQLRDL            | 1552.75 | 0.20 | 0.20 | Conglycin<br>in | EI, PQ, EK, TP, LR, KNPQLR, EITPEKNPQLR, NP, QL, PE                      | ACE inhibitor, fatty acid synthase inhibitor, $\alpha$ -glucosidase inhibitor, DPP-IV inhibitor                                                                   |
| QGFSRNILEA               | 1134.26 | 0.32 | 0.11 | Conglycin<br>in | GF, QG, EA, IL, RN                                                       | ACE inhibitor, glucose uptake stimulation, $\alpha$ -glucosidase inhibitor, DPP-IV inhibitor                                                                      |
| SRDPIYSNKLK              | 1249.39 | 0.53 | 0.11 | Conglycin<br>in | IY, LG, NKL, KL, NK, DP, PI, YS                                          | ACE inhibitor, antioxidant, DPP-IV inhibitor                                                                                                                      |
| AIPVKNKGRF               | 1098.31 | 0.85 | 0.21 | Conglycin<br>in | PG, RF, AIP, IP, GR, AI, NK, KP, PV, VN                                  | ACE inhibitor, antioxidant, antiamnestic, antithrombotic, regulating the stomach mucosal membrane activity, DPP-IV inhibitor                                      |
| SEQDIFVIPA               | 1118.25 | 0.39 | 0.06 | Conglycin<br>in | IPA, IP, IF, SE, PA, QD, VI                                              | ACE inhibitor, stimulating vasoactive substance release, DPP-IV inhibitor                                                                                         |
| FLSSTEAAQSYLQGFSR<br>NIL | 2289.53 | 0.32 | 0.11 | Conglycin<br>in | YL, GF, QG, EA, SY, TE, LQ, IL, ST, FL, QQ, QS, RN, TE                   | ACE inhibitor, neuropeptide, glucose uptake stimulation, $\alpha$ -glucosidase inhibitor, DPP-IV inhibitor                                                        |



|                        |         |      |      |                 |                                                                 |                                                                                                                                                                         |
|------------------------|---------|------|------|-----------------|-----------------------------------------------------------------|-------------------------------------------------------------------------------------------------------------------------------------------------------------------------|
| LRSRDPIYSNKLKG         | 1646.91 | 0.32 | 0.27 | Conglycin<br>in | IY, GK, LG, NKL, KL, NK, LR, DP, PI, YS                         | ACE inhibitor, antioxidant, DPP-IV inhibitor                                                                                                                            |
| EDEQPRPIPFPRPQPR       | 1959.19 | 0.62 | 0.21 | Conglycin<br>in | FP, PR, IP, RP, PQ, PFP, QP, PI                                 | ACE inhibitor, DPP-IV inhibitor                                                                                                                                         |
| MNEGALLLPHFNSKA        | 1641.91 | 0.41 | 0.16 | Conglycin<br>in | LLP, GA, EG, KA, PH, LP, LLL, LL, LLPH, PHF,<br>AL, EG, MN, NE  | ACE inhibitor, antioxidant, stimulating vasoactive substance release,<br>glucose uptake stimulation, DPP-IV inhibitor                                                   |
| NEGALLLPHF             | 1110.28 | 0.71 | 0.14 | Conglycin<br>in | LLP, GA, EG, PH, LP, LLL, LL, LLPH, PHF, AL,<br>EG, NE          | ACE inhibitor, antioxidant, stimulating vasoactive substance release,<br>glucose uptake stimulation, DPP-IV inhibitor                                                   |
| FNQRSPQLQNLRD          | 1615.77 | 0.27 | 0.28 | Conglycin<br>in | FNQ, LQ, PQ, LR, NLR, SP, FN, NL, NQ, QL, QN                    | ACE inhibitor, DPP-IV inhibitor                                                                                                                                         |
| KTISSDKPFNLRSRD        | 1893.09 | 0.21 | 0.15 | Conglycin<br>in | KP, LR, NLR, SE, FN, KT, NL, PF, TI                             | ACE inhibitor, antioxidant, stimulating vasoactive substance release,<br>DPP-IV inhibitor                                                                               |
| TISSDKPFN              | 1137.21 | 0.26 | 0.06 | Conglycin<br>in | KP, SE, FN, PF, TI                                              | ACE inhibitor, antioxidant, stimulating vasoactive substance release,<br>DPP-IV inhibitor                                                                               |
| NSKPNTLLLPNHADAD<br>YL | 1996.21 | 0.32 | 0.17 | Conglycin<br>in | YL, LLP, DA, KP, DY, LP, LLL, LL, HA, AD, NH,<br>NT, PN, SK, TL | ACE inhibitor, antioxidant, neuropeptide, stimulating vasoactive<br>substance release, glucose uptake stimulation, $\alpha$ -glucosidase<br>inhibitor, DPP-IV inhibitor |
| LAFPGSAQAVEK           | 1217.39 | 0.22 | 0.19 | Conglycin<br>in | PG, FP, AFP, AF, LA, GS, VE, EK, AV, LAF, QA                    | ACE inhibitor, antioxidant, anti-amnestic, antithrombotic, regulating<br>the stomach mucosal membrane activity, $\alpha$ -glucosidase inhibitor,<br>DPP-IV inhibitor    |
| FLSSTEAAQSYLQG         | 1558.66 | 0.21 | 0.09 | Conglycin<br>in | YL, QG, EA, SY, TE, LQ, ST, FL, QQ, QS                          | ACE inhibitor, neuropeptide, $\alpha$ -glucosidase inhibitor, DPP-IV<br>inhibitor                                                                                       |
| NSKPNTLLLPNHADAD<br>Y  | 1883.05 | 0.20 | 0.15 | Conglycin<br>in | LLP, DA, KP, DY, LP, LLL, LL, HA, AD, NH, NT,<br>PN, SK, TL     | ACE inhibitor, antioxidant, stimulating vasoactive substance release,<br>glucose uptake stimulation, $\alpha$ -glucosidase inhibitor, DPP-IV inhibitor                  |
| ESEDSELRRHKKNPF        | 1986.13 | 0.42 | 0.17 | Conglycin<br>in | NK, RR, HK, LR, SE, EL, RHK, NP, ES, PF                         | ACE inhibitor, antioxidant, stimulating vasoactive substance release,<br>DPP-IV inhibitor                                                                               |

|                         |         |      |      |                 |                                                                                        |                                                                                                                                |
|-------------------------|---------|------|------|-----------------|----------------------------------------------------------------------------------------|--------------------------------------------------------------------------------------------------------------------------------|
| NQRSPQLQNL              | 1197.32 | 0.26 | 0.30 | Conglycin<br>in | LQ, PQ, SP, NL, NQ, PQ, QL, QN                                                         | ACE inhibitor, DPP-IV inhibitor                                                                                                |
| VDMNEGALLLPH            | 1308.52 | 0.28 | 0.15 | Conglycin<br>in | LLP, GA, EG, PH, DM, LP, LLL, LL, LLPH, AL,<br>MN, NE, VD                              | ACE inhibitor, antioxidant, stimulating vasoactive substance release,<br>glucose uptake stimulation, DPP-IV inhibitor          |
| FAIGINAENNQRNF          | 1607.75 | 0.37 | 0.09 | Conglycin<br>in | IG, GI, AI, NF, IGINAENNQRN, FA, AE, IN, NA,<br>NN, NQ, RN                             | ACE inhibitor, antioxidant, DPP-IV inhibitor                                                                                   |
| LAIPVNKPGRFESF          | 1574.84 | 0.64 | 0.13 | Conglycin<br>in | PG, RF, AIP, IP, LA, GR, AI, NK, KP, ES, PV, VN                                        | ACE inhibitor, antioxidant, antiamnesic, antithrombotic, regulating<br>the stomach mucosal membrane activity, DPP-IV inhibitor |
| NEGALLLPHFNS            | 1311.46 | 0.41 | 0.11 | Conglycin<br>in | LLP, GA, EG, PH, DM, LP, LLL, LL, LLPH, PHF,<br>AL, NE                                 | ACE inhibitor, antioxidant, stimulating vasoactive substance release,<br>glucose uptake stimulation, DPP-IV inhibitor          |
| RDLDF                   | 777.88  | 0.62 | 0.10 | Conglycin<br>in | IF                                                                                     | ACE inhibitor                                                                                                                  |
| FGSNRFET                | 957.01  | 0.46 | 0.08 | Conglycin<br>in | RF, FG, GS, ET, NR                                                                     | ACE inhibitor, DPP-IV inhibitor                                                                                                |
| SIVDMNEGALLLPHFNS<br>KA | 2056.36 | 0.65 | 0.11 | Conglycin<br>in | LLP, GA, EG, KA, PH, DM, LP, LLL, IV, LL,<br>LLPH, PHF, AL, FN, HF, MN, NE, SI, SK, VD | ACE inhibitor, antioxidant, stimulating vasoactive substance release,<br>glucose uptake stimulation, DPP-IV inhibitor          |
| FKNQYGRIRV              | 1280.50 | 0.37 | 0.28 | Conglycin<br>in | IR, YG, GR, NQ, QY, RI, RV                                                             | ACE inhibitor, antioxidant, antiinflammation, DPP-IV inhibitor                                                                 |
| LSIVDMNEGALLLPHFN<br>S  | 1970.27 | 0.39 | 0.09 | Conglycin<br>in | LLP, GA, EG, PH, DM, LP, LLL, IV, LL, LLPH,<br>PHF, AL, FN, HF, MN, NE, SI, SK, VD     | ACE inhibitor, antioxidant, stimulating vasoactive substance release,<br>glucose uptake stimulation, DPP-IV inhibitor          |
| NEGALLLPHFNSKAI         | 1623.87 | 0.64 | 0.13 | Conglycin<br>in | LLP, GA, AI, EG, KA, PH, LP, LLL, LL, LLPH,<br>PHF, KAI, AL, FN, HF, NE, SK            | ACE inhibitor, antioxidant, stimulating vasoactive substance release,<br>glucose uptake stimulation, DPP-IV inhibitor          |
| ILEFNSKPNT              | 1162.31 | 0.22 | 0.09 | Conglycin<br>in | KP, LEF, IL, EF, FN, IL, NT, PN, SK, EF                                                | ACE inhibitor, antioxidant, hypolipidemic, glucose uptake<br>stimulation, DPP-IV inhibitor                                     |
| RDLDFL                  | 891.03  | 0.70 | 0.13 | Conglycin<br>in | IF, IFL, FL                                                                            | ACE inhibitor, DPP-IV inhibitor                                                                                                |

|                         |         |      |      |                  |                                                                                 |                                                                                                                               |
|-------------------------|---------|------|------|------------------|---------------------------------------------------------------------------------|-------------------------------------------------------------------------------------------------------------------------------|
| QRFNQRSPQLQNL           | 1628.81 | 0.37 | 0.39 | Conglycin<br>in  | RF, FNQ, LQ, PQ, SP, FN, NL, NQ, QL, QN                                         | ACE inhibitor, DPP-IV inhibitor                                                                                               |
| IPVKNKGRF               | 1027.23 | 0.81 | 0.19 | Conglycin<br>in  | PG, RF, IP, GR, NK, KP, PV, VN                                                  | ACE inhibitor, antioxidant, anti-amnestic, antithrombotic, regulating the stomach mucosal membrane activity, DPP-IV inhibitor |
| NEGALLPH                | 963.10  | 0.38 | 0.19 | Conglycin<br>in  | LLP, GA, EG, PH, LP, LLL, LL, LLPH, AL, NE                                      | ACE inhibitor, antioxidant, stimulating vasoactive substance release, glucose uptake stimulation, DPP-IV inhibitor            |
| PIYSNKL                 | 891.03  | 0.48 | 0.09 | Conglycin<br>in  | IY, LG, NKL, KL, NK, PI, YS                                                     | ACE inhibitor, antioxidant, DPP-IV inhibitor                                                                                  |
| FAIGINAENNQRNFLAG<br>SQ | 2064.24 | 0.20 | 0.11 | Conglycin<br>in  | LA, IG, GI, AG, GS, AI, NF, AGS, FA, FL, AE, IN,<br>NA, IGINAENNQRN, NN, NQ, RN | ACE inhibitor, antioxidant, DPP-IV inhibitor                                                                                  |
| FAIGINAENNQRNFLAG       | 1849.04 | 0.38 | 0.11 | Conglycin<br>in  | LA, IG, GI, AG, AI, NF, IGINAENNQRN, FA, FL,<br>AE, IN, NA, NN, NQ, RN          | ACE inhibitor, antioxidant, DPP-IV inhibitor                                                                                  |
| VVNPDDNNENLRLIT         | 1610.79 | 0.27 | 0.19 | Conglycin<br>in  | RL, VNP, LR, NLR, LI, NEN, VV, NP, DN, NE, NL,<br>NN, VN                        | ACE inhibitor, antioxidant, glucose uptake stimulation, DPP-IV inhibitor                                                      |
| EEINKVLF                | 991.15  | 0.23 | 0.11 | Conglycin<br>in  | LF, NK, EI, INKV, VL, EE, IN, KV                                                | ACE inhibitor, stimulating vasoactive substance release, glucose uptake stimulation, DPP-IV inhibitor                         |
| LAIPVKNKPG              | 908.11  | 0.35 | 0.22 | 5Conglyci<br>nin | PG, AIP, IP, LA, AI, NK, KP, IP, PV, VN                                         | ACE inhibitor, antioxidant, anti-amnestic, antithrombotic, regulating the stomach mucosal membrane activity, DPP-IV inhibitor |
| AIPVKNKGRFES            | 1314.51 | 0.50 | 0.13 | Conglycin<br>in  | PG, RF, AIP, IP, DR, AI, NK, KP, IP, ES, PV, VN                                 | ACE inhibitor, antioxidant, anti-amnestic, antibacterial, regulating the stomach mucosal membrane activity, DPP-IV inhibitor  |
| SEQDIFVIPAG             | 1175.30 | 0.42 | 0.05 | Conglycin<br>in  | IPA, IP, IF, AG, SE, PA, QD, VI                                                 | ACE inhibitor, stimulating vasoactive substance release, DPP-IV inhibitor                                                     |
| SSSRKTISSDKPFN          | 1682.81 | 0.25 | 0.09 | Conglycin<br>in  | KP, SSS, SE, FN, KT, PF, RK, TI                                                 | ACE inhibitor, antioxidant, stimulating vasoactive substance release, DPP-IV inhibitor                                        |
| FSRNILE                 | 878.00  | 0.36 | 0.10 | Conglycin<br>in  | IL, RN                                                                          | ACE inhibitor, glucose uptake stimulation, DPP-IV inhibitor                                                                   |

|                   |         |      |      |                 |                                                                  |                                                                                                                                                     |
|-------------------|---------|------|------|-----------------|------------------------------------------------------------------|-----------------------------------------------------------------------------------------------------------------------------------------------------|
| LPNHADADYL        | 1128.21 | 0.32 | 0.11 | Conglycin<br>in | YL, DA, DY, LP, HA, AD, NH, PN                                   | ACE inhibitor, neuropeptide, $\alpha$ -glucosidase inhibitor, DPP-IV inhibitor                                                                      |
| LRLIT             | 614.79  | 0.20 | 0.61 | Conglycin<br>in | RL, LR, LI                                                       | ACE inhibitor, stimulating vasoactive substance release, DPP-IV inhibitor                                                                           |
| QGFSRNILE         | 1063.18 | 0.39 | 0.10 | Conglycin<br>in | GF, QG, IL, RN                                                   | ACE inhibitor, glucose uptake stimulation, DPP-IV inhibitor                                                                                         |
| LAIPVKNKGRFESFF   | 1722.02 | 0.78 | 0.11 | Conglycin<br>in | PG, RF, AIP, IP, LA, GR, AI, SF, NK, KP, FF, IP, ES, PV, VN      | ACE inhibitor, antioxidant, antiamnestic, antithrombotic, regulating the stomach mucosal membrane activity, DPP-IV inhibitor                        |
| FEITPEKNPQL       | 1315.49 | 0.23 | 0.11 | Conglycin<br>in | EI, PQ, EK, TP, NP, QL, PE                                       | ACE inhibitor, $\alpha$ -glucosidase inhibitor, DPP-IV inhibitor                                                                                    |
| SPQLQNLRD         | 1070.17 | 0.33 | 0.23 | Conglycin<br>in | LQ, PQ, LR, NLR, SP, NL, QL, QN                                  | ACE inhibitor, DPP-IV inhibitor                                                                                                                     |
| FSRNIL            | 748.88  | 0.65 | 0.12 | Conglycin<br>in | IL, RN                                                           | ACE inhibitor, glucose uptake stimulation, DPP-IV inhibitor                                                                                         |
| FEITPEKNPQLRDLDFL | 2188.51 | 0.46 | 0.13 | Conglycin<br>in | IF, EI, PQ, EK, IFL, TP, LR, KNPQLR, EITPEKNPQLR, NP, FL, QL, PE | ACE inhibitor, fatty acid synthase inhibitor, $\alpha$ -glucosidase inhibitor, DPP-IV inhibitor                                                     |
| LAFPGSAQ          | 789.89  | 0.30 | 0.11 | Conglycin<br>in | PG, FP, AFP, AF, LA, GS, LAF                                     | ACE inhibitor, antioxidant, antiamnestic, antithrombotic, regulating the stomach mucosal membrane activity, DPP-IV inhibitor                        |
| ITLAIPVKNKGRFESFF | 1936.28 | 0.56 | 0.11 | Conglycin<br>in | PG, RF, AIP, IP, LA, GR, AI, SF, NK, KP, FF, IP, ES, PV, VN      | ACE inhibitor, antioxidant, antiamnestic, antithrombotic, regulating the stomach mucosal membrane activity, DPP-IV inhibitor                        |
| FFEITPEKNPQLRDL   | 1962.19 | 0.25 | 0.12 | Conglycin<br>in | EI, PQ, EK, TP, LR, FF, KNPQLR, EITPEKNPQLR, NP, QL, PE          | ACE inhibitor, fatty acid synthase inhibitor, $\alpha$ -glucosidase inhibitor, DPP-IV inhibitor                                                     |
| SKPNTLLLPNHADAD   | 1605.77 | 0.20 | 0.18 | Conglycin<br>in | LLP, DA, KP, LP, LLL, LL, HA, AD, NH, NT, PN, TL                 | ACE inhibitor, antioxidant, stimulating vasoactive substance release, glucose uptake stimulation, $\alpha$ -glucosidase inhibitor, DPP-IV inhibitor |
| GALLLPH           | 719.88  | 0.54 | 0.33 | Conglycin<br>in | LLP, GA, PH, LP, LLL, LL, LLPH, AL                               | ACE inhibitor, antioxidant, stimulating vasoactive substance release, glucose uptake stimulation, DPP-IV inhibitor                                  |

|                       |         |      |      |                 |                                                                    |                                                                                                                                                                                                 |
|-----------------------|---------|------|------|-----------------|--------------------------------------------------------------------|-------------------------------------------------------------------------------------------------------------------------------------------------------------------------------------------------|
| SEQDIFVIPAGY          | 1338.48 | 0.38 | 0.05 | Conglycin<br>in | IPA, GY, IP, IF, AG, SE, PAGY, PA, QD, VI                          | ACE inhibitor, antioxidant, stimulating vasoactive substance release,<br>DPP-IV inhibitor                                                                                                       |
| EITPEKNPQLRDLIF       | 1928.17 | 0.30 | 0.12 | Conglycin<br>in | IF, EI, PQ, EK, TP, LR, KNPQLR, EITPEKNPQLR,<br>NP, QL, PE         | ACE inhibitor, fatty acid synthase inhibitor, $\alpha$ -glucosidase inhibitor,<br>DPP-IV inhibitor                                                                                              |
| LAFPGSAQAVEKLLKN<br>Q | 1814.11 | 0.28 | 0.37 | Conglycin<br>in | PG, FP, AFP, AF, LA, GS, VE, EK, AV, LAF, NQ,<br>QA                | ACE inhibitor, antioxidant, antiamnestic, antithrombotic, glucose<br>uptake stimulation, regulating the stomach mucosal membrane<br>activity, $\alpha$ -glucosidase inhibitor, DPP-IV inhibitor |
| PVKNKGRF              | 914.08  | 0.80 | 0.30 | Conglycin<br>in | PG, RF, GR, NK, KP, PV, VN                                         | ACE inhibitor, antioxidant, antiamnestic, antithrombotic, regulating<br>the stomach mucosal membrane activity, DPP-IV inhibitor                                                                 |
| SEQDIFVIPAGYPV        | 1534.73 | 0.44 | 0.06 | Conglycin<br>in | IPA, GY, YP, IP, IF, AG, SE, VIPAGYP, PAGY,<br>PA, IPA, PV, QD, VI | ACE inhibitor, antioxidant, stimulating vasoactive substance release,<br>$\alpha$ -glucosidase inhibitor, DPP-IV inhibitor                                                                      |
| LLLPH                 | 591.75  | 0.41 | 0.40 | Conglycin<br>in | LLP, PH, LP, LLL, LL, LLPH                                         | ACE inhibitor, antioxidant, stimulating vasoactive substance release,<br>glucose uptake stimulation, DPP-IV inhibitor                                                                           |
| FGSNRFETLFKNQ         | 1587.76 | 0.33 | 0.15 | Conglycin<br>in | RF, LF, FG, GS, ET, NQ, NR, TL                                     | ACE inhibitor, DPP-IV inhibitor                                                                                                                                                                 |
| LLLPHFNS              | 940.11  | 0.36 | 0.12 | Conglycin<br>in | LLP, PH, LP, LLL, LL, LLPH, PHF, FN, HF                            | ACE inhibitor, antioxidant, stimulating vasoactive substance release,<br>glucose uptake stimulation, DPP-IV inhibitor                                                                           |
| PNHADADYLI            | 1128.21 | 0.42 | 0.07 | Conglycin<br>in | YL, DA, DY, LI, HA, AD, NH, PN                                     | ACE inhibitor, neuropeptide, glucose uptake stimulation, $\alpha$ -<br>glucosidase inhibitor, DPP-IV inhibitor                                                                                  |
| GALLLPHFNSKA          | 1267.49 | 0.61 | 0.21 | Conglycin<br>in | LLP, GA, KA, PH, LP, LLL, LL, LLPH, PHF, AL,<br>SK, FN, HF         | ACE inhibitor, antioxidant, stimulating vasoactive substance release,<br>glucose uptake stimulation, DPP-IV inhibitor                                                                           |
| NSKPNTLLLPN           | 1210.40 | 0.34 | 0.28 | Conglycin<br>in | LLP, KP, LP, LLL, LL, NT, PN, SK, TL                               | ACE inhibitor, antioxidant, stimulating vasoactive substance release,<br>glucose uptake stimulation, DPP-IV inhibitor                                                                           |
| YRILEF                | 839.99  | 0.44 | 0.11 | Conglycin<br>in | LEF, IL, EF, YR, RI                                                | ACE inhibitor, hypolipidemic, neuropeptide, glucose uptake<br>stimulation, DPP-IV inhibitor                                                                                                     |

|                     |         |      |      |                 |                                                                         |                                                                                                                                     |
|---------------------|---------|------|------|-----------------|-------------------------------------------------------------------------|-------------------------------------------------------------------------------------------------------------------------------------|
| LSIVDMNEGAL         | 1161.34 | 0.31 | 0.09 | Conglycin<br>in | GA, EG, DM, IV, AL, MN, NE, SI, VD                                      | ACE inhibitor, glucose uptake stimulation, DPP-IV inhibitor                                                                         |
| LLPHFNSKA           | 1026.20 | 0.39 | 0.17 | Conglycin<br>in | LLP, KA, PH, LP, LL, LLPH, PHF, SK, FN, HF                              | ACE inhibitor, antioxidant, glucose uptake stimulation, DPP-IV inhibitor                                                            |
| SSSRKTISSSEDKPFLNRS | 2039.23 | 0.25 | 0.12 | Conglycin<br>in | KP, LR, NLR, SSS, SE, FN, KT, NL, PF, RK, TI                            | ACE inhibitor, antioxidant, stimulating vasoactive substance release, DPP-IV inhibitor                                              |
| IFVIPAGYPV          | 1075.32 | 0.38 | 0.07 | Conglycin<br>in | IPA, GY, YP, IP, IF, AG, VIPAGYP, PAGY, PA, AG, PV, VI                  | ACE inhibitor, antioxidant, $\alpha$ -glucosidase inhibitor, DPP-IV inhibitor                                                       |
| KNQYGRIRVLQ         | 1374.61 | 0.20 | 0.47 | Conglycin<br>in | IR, YG, GR, LQ, VL, NQ, QY, RI, RV                                      | ACE inhibitor, antioxidant, antiinflammation, glucose uptake stimulation, DPP-IV inhibitor                                          |
| SEQDIFVIPAGYPVVV    | 1732.99 | 0.52 | 0.07 | Conglycin<br>in | IPA, GY, YP, IP, IF, AG, SE, VVV, VIPAGYP, PAGY, PA, VV, AG, PV, QD, VI | ACE inhibitor, antioxidant, anticancer, stimulating vasoactive substance release, $\alpha$ -glucosidase inhibitor, DPP-IV inhibitor |
| LAFPGSAQA           | 860.97  | 0.28 | 0.13 | Conglycin<br>in | PG, FP, AFP, AF, LA, GS, LAF, QA                                        | ACE inhibitor, antioxidant, antiamnestic, antithrombotic, regulating the stomach mucosal membrane activity, DPP-IV inhibitor        |
| QLQNLRDYRILEF       | 1707.95 | 0.42 | 0.24 | Conglycin<br>in | LQ, LEF, DY, IL, LR, NLR, EF, YR, RDY, NL, QL, QN, RI, YR               | ACE inhibitor, antioxidant, hypolipidemic, neuropeptide, glucose uptake stimulation, DPP-IV inhibitor                               |
| LLPHFNS             | 826.95  | 0.46 | 0.09 | Conglycin<br>in | LLP, PH, LP, LL, LLPH, PHF, SK, FN, HF                                  | ACE inhibitor, antioxidant, glucose uptake stimulation, DPP-IV inhibitor                                                            |
| IPSQVQELAFPGS       | 1372.54 | 0.33 | 0.08 | Conglycin<br>in | PG, FP, AFP, IP, AF, LA, GS, EL, LAF, PS, QE, QV, VQ                    | ACE inhibitor, antioxidant, antiamnestic, antithrombotic, regulating the stomach mucosal membrane activity, DPP-IV inhibitor        |
| LLLPHF              | 738.93  | 0.77 | 0.21 | Conglycin<br>in | LLP, PH, LP, LLL, LL, LLPH, PHF, SK, FN, HF                             | ACE inhibitor, antioxidant, stimulating vasoactive substance release, glucose uptake stimulation, DPP-IV inhibitor                  |
| SQIPSQVQEL          | 1128.25 | 0.21 | 0.08 | Conglycin<br>in | IP, EL, PS, QE, QI, QV, VQ                                              | ACE inhibitor, antioxidant, DPP-IV inhibitor                                                                                        |
| EASYDTKF            | 960.01  | 0.41 | 0.07 | Conglycin<br>in | EA, SY, KF, AS, TK, YD                                                  | ACE inhibitor, DPP-IV inhibitor                                                                                                     |

|                          |         |      |      |                 |                                                                                                         |                                                                                                                                                                                                 |
|--------------------------|---------|------|------|-----------------|---------------------------------------------------------------------------------------------------------|-------------------------------------------------------------------------------------------------------------------------------------------------------------------------------------------------|
| DEQPRPIPFPRPQPR          | 1830.08 | 0.73 | 0.25 | Conglycin<br>in | FP, PR, IP, RP, PQ, PFP, QP, PF, PI                                                                     | ACE inhibitor, DPP-IV inhibitor                                                                                                                                                                 |
| KKEEGNKGRKGPLS           | 1527.74 | 0.28 | 0.41 | Conglycin<br>in | GP, GPL, PL, GR, KG, EG, NK, KE, KGP, EE, KK                                                            | ACE inhibitor, antiamnestic, antithrombotic, stimulating vasoactive<br>substance release, regulating the stomach mucosal membrane<br>activity, DPP-IV inhibitor                                 |
| AENNQRNFLAG              | 1233.31 | 0.36 | 0.19 | Conglycin<br>in | LA, AG, NF, FL, AE, NN, NQ, RN                                                                          | ACE inhibitor, DPP-IV inhibitor                                                                                                                                                                 |
| YRILEFN                  | 954.09  | 0.31 | 0.11 | Conglycin<br>in | LEF, IL, EF, YR, FN, RI                                                                                 | ACE inhibitor, hypolipidemic, neuropeptide, glucose uptake<br>stimulation, DPP-IV inhibitor                                                                                                     |
| SIVDMNEGALL              | 1161.34 | 0.50 | 0.09 | Conglycin<br>in | GA, EG, DM, IV, LL, AL, MN, NE, SI, VD                                                                  | ACE inhibitor, glucose uptake stimulation, DPP-IV inhibitor                                                                                                                                     |
| KLQSPDDERKQIVTVEG<br>GL  | 2112.37 | 0.23 | 0.20 | Glycinin        | GL, GG, EG, KL, VE, LQ, ER, IV, SP, QI, QS, RK,<br>TV, VT                                               | ACE inhibitor, glucose uptake stimulation, $\alpha$ -glucosidase inhibitor,<br>DPP-IV inhibitor                                                                                                 |
| NRNGLHLPSYSPYPR          | 1770.97 | 0.36 | 0.16 | Glycinin        | LHLP, PYP, YPR, PR, YP, PSY, GL, HL, NG, SY,<br>LP, LH, LHL, PY, NR, PS, RN, YS                         | ACE inhibitor, antioxidant, antiinflammation, $\alpha$ -glucosidase<br>inhibitor, DPP-IV inhibitor                                                                                              |
| KYEGNWGPLVNPESQQ<br>GSPR | 2243.42 | 0.34 | 0.15 | Glycinin        | GP, PR, GPL, PL, NWGPLV, GS, WG, QG, EG,<br>KY, VNP, YE, LV, VNPESQQGSPR, NP, ES, NW,<br>QG, QQ, VN, PE | ACE inhibitor, antioxidant, antiamnestic, antithrombotic, glucose<br>uptake stimulation, regulating the stomach mucosal membrane<br>activity, $\alpha$ -glucosidase inhibitor, DPP-IV inhibitor |
| SGFSKHFLAQSFNTNE         | 1813.94 | 0.43 | 0.07 | Glycinin        | LA, GF, SG, SF, FL, FN, HF, KH, NE, NT, QS, SK,<br>TN                                                   | ACE inhibitor, DPP-IV inhibitor                                                                                                                                                                 |
| LKYEGNWGPLVNPESQ<br>QGSP | 2200.39 | 0.24 | 0.12 | Glycinin        | GP, GPL, PL, NWGPLV, GS, WG, QG, EG, KY,<br>VNP, YE, LV, VNPESQQGSPR, NP, ES, NW, QG,<br>QQ, VN, PE     | ACE inhibitor, antioxidant, antiamnestic, antithrombotic, glucose<br>uptake stimulation, regulating the stomach mucosal membrane<br>activity, $\alpha$ -glucosidase inhibitor, DPP-IV inhibitor |
| TLNRNGLHLPSYSPYPR<br>M   | 2116.43 | 0.37 | 0.18 | Glycinin        | LHLP, PYP, YPR, PR, YP, PSY, GL, HL, NG, SY,<br>LP, LH, LHL, PY, NR, PS, RN, YS                         | ACE inhibitor, antioxidant, antiinflammation, $\alpha$ -glucosidase<br>inhibitor, DPP-IV inhibitor                                                                                              |

|                         |         |      |      |          |                                                                                                         |                                                                                                                                                                                                |
|-------------------------|---------|------|------|----------|---------------------------------------------------------------------------------------------------------|------------------------------------------------------------------------------------------------------------------------------------------------------------------------------------------------|
| KYEGNWGPLVNPESQQ<br>GS  | 1990.12 | 0.24 | 0.11 | Glycinin | GP, GPL, PL, NWGPLV, GS, WG, QG, EG, KY,<br>VNP, YE, LV, VNPESQQGSPR, NP, ES, NW, QG,<br>QQ, VN, PE     | ACE inhibitor, antioxidant, antiamnesic, antithrombotic, glucose<br>uptake stimulation, regulating the stomach mucosal membrane<br>activity, $\alpha$ -glucosidase inhibitor, DPP-IV inhibitor |
| KYEGNWGPLVNPESQQ<br>GSP | 2087.23 | 0.27 | 0.11 | Glycinin | GP, GPL, PL, NWGPLV, GS, WG, QG, EG, KY,<br>VNP, YE, LV, VNPESQQGSPR, NP, ES, NW, QG,<br>QQ, VN, PE     | ACE inhibitor, antioxidant, antiamnesic, antithrombotic, glucose<br>uptake stimulation, regulating the stomach mucosal membrane<br>activity, $\alpha$ -glucosidase inhibitor, DPP-IV inhibitor |
| ADFYNPKAGRIST           | 1439.59 | 0.46 | 0.13 | Glycinin | FY, AG, GR, KA, FYN, DF, ST, YN, DFY, ADF,<br>NP, AD, PK, RI                                            | ACE inhibitor, antioxidant, $\alpha$ -glucosidase inhibitor, DPP-IV inhibitor                                                                                                                  |
| LKYEGNWGPLVNPESQ<br>QG  | 2016.20 | 0.22 | 0.14 | Glycinin | GP, GPL, GP, PL, NWGPLV, GS, WG, QG, EG,<br>KY, VNP, YE, LV, VNPESQQGSPR, NP, ES, NW,<br>QG, QQ, VN, PE | ACE inhibitor, antioxidant, antiamnesic, antithrombotic, glucose<br>uptake stimulation, regulating the stomach mucosal membrane<br>activity, $\alpha$ -glucosidase inhibitor, DPP-IV inhibitor |
| TLNRNGLHLPSYSPYPR       | 1985.23 | 0.25 | 0.19 | Glycinin | LHLP, PYP, YPR, PR, YP, PSY, GL, HL, NG, SY,<br>LP, LH, LHL, PY, NR, PS, RN, YS                         | ACE inhibitor, antioxidant, antiinflammation, $\alpha$ -glucosidase<br>inhibitor, DPP-IV inhibitor                                                                                             |
| NRNGLHLPSYSPYP          | 1614.78 | 0.28 | 0.11 | Glycinin | LHLP, PYP, YPR, YP, PSY, GL, HL, NG, SY, LP,<br>LH, LHL, PY, NR, PS, RN, YS                             | ACE inhibitor, antioxidant, antiinflammation, $\alpha$ -glucosidase<br>inhibitor, DPP-IV inhibitor                                                                                             |
| NLNALEPDHRVESEGG<br>L   | 1849.97 | 0.25 | 0.13 | Glycinin | GL, GG, EG, VE, LN, ALEP, SE, ALEPDHR,<br>NALEPDHRVESEGG, EP, AL, ES, HR, NA, NL,<br>VE                 | ACE inhibitor, antioxidant, stimulating vasoactive substance release,<br>$\alpha$ -glucosidase inhibitor, DPP-IV inhibitor                                                                     |
| NRNGLHLPSYSPYPRM        | 1902.16 | 0.52 | 0.15 | Glycinin | LHLP, PYP, YPR, YP, PSY, GL, HL, NG, SY, LP,<br>LH, LHL, PY, NR, PS, RN, YS                             | ACE inhibitor, antioxidant, antiinflammation, $\alpha$ -glucosidase<br>inhibitor, DPP-IV inhibitor                                                                                             |
| RADFYNPKAGRIST          | 1595.78 | 0.33 | 0.20 | Glycinin | FY, RA, AG, GR, KA, FYN, DF, ST, YN, DFY,<br>RADFY, ADF, NP, AD, PK, RI, YN                             | ACE inhibitor, antioxidant, $\alpha$ -glucosidase inhibitor, DPP-IV inhibitor                                                                                                                  |
| HENIARPSRADFYNPKA<br>G  | 2043.23 | 0.24 | 0.15 | Glycinin | FY, IA, RP, RA, AG, AR, GR, KA, FYN, DF, YN,<br>DFY, RADFY, ADF, NP, AD, PK, RI, YN, HE, PS             | ACE inhibitor, antioxidant, $\alpha$ -glucosidase inhibitor, DPP-IV inhibitor                                                                                                                  |
| RAIPSEVLAHSYNL          | 1569.78 | 0.25 | 0.13 | Glycinin | AIP, AHSY, IP, LA, RA, AI, SY, EV, AH, YN,<br>YNL, SE, HS, NL, PS, SY, VL                               | ACE inhibitor, antioxidant, stimulating vasoactive substance release,<br>glucose uptake stimulation, DPP-IV inhibitor                                                                          |



|                       |         |      |      |          |                                                                                                         |                                                                                                                                                                                                |
|-----------------------|---------|------|------|----------|---------------------------------------------------------------------------------------------------------|------------------------------------------------------------------------------------------------------------------------------------------------------------------------------------------------|
| KYEGNWGPLVNPESQQ<br>G | 1903.04 | 0.25 | 0.12 | Glycinin | GP, GPL, GP, PL, NWGPLV, GS, WG, QG, EG,<br>KY, VNP, YE, LV, VNPESQQGSPR, NP, ES, NW,<br>QG, QQ, VN, PE | ACE inhibitor, antioxidant, antiamnesic, antithrombotic, glucose<br>uptake stimulation, regulating the stomach mucosal membrane<br>activity, $\alpha$ -glucosidase inhibitor, DPP-IV inhibitor |
| FNNQLDQTPR            | 1232.32 | 0.30 | 0.20 | Glycinin | PR, TP, DQ, FN, NN, NQ, QL, QT                                                                          | ACE inhibitor, DPP-IV inhibitor                                                                                                                                                                |
| TLNRNGLHLPSYSPYP      | 1829.05 | 0.20 | 0.14 | Glycinin | LHLP, PYP, YPR, YP, PSY, GL, HL, NG, SY, LP,<br>LH, LHL, PY, NR, PS, RN                                 | ACE inhibitor, antioxidant, antiinflammation, $\alpha$ -glucosidase<br>inhibitor, DPP-IV inhibitor                                                                                             |
| WGPLVNPESQQGSPR       | 1651.80 | 0.40 | 0.16 | Glycinin | GP, PR, GPL, PL, GS, WG, QG, VNP, LV,<br>VNPESQQGSPR, NP, ES, QG, QQ, VN, PE                            | ACE inhibitor, antioxidant, antiamnesic, antithrombotic, glucose<br>uptake stimulation, regulating the stomach mucosal membrane<br>activity, $\alpha$ -glucosidase inhibitor, DPP-IV inhibitor |
| IQTWNSQHPEL           | 1352.47 | 0.23 | 0.10 | Glycinin | HP, EL, PEL, TW, WN, IQ, QH, QT, PE                                                                     | ACE inhibitor, antioxidant, $\alpha$ -glucosidase inhibitor, DPP-IV inhibitor                                                                                                                  |
| PSYSPYPR              | 966.06  | 0.81 | 0.08 | Glycinin | PYP, YPR, PR, YP, PSY, SY, PY, SP, PS, YS                                                               | ACE inhibitor, antiinflammation, $\alpha$ -glucosidase inhibitor, DPP-IV<br>inhibitor                                                                                                          |
| NSLTLPALRQFQLSAQ      | 1787.05 | 0.24 | 0.38 | Glycinin | FQ, LR, LP, SL, PA, AL, LT, QF, QL, TL                                                                  | ACE inhibitor, $\alpha$ -glucosidase inhibitor, DPP-IV inhibitor                                                                                                                               |
| PALRQFQLSAQ           | 1258.44 | 0.21 | 0.35 | Glycinin | FQ, LR, PA, AL, QF, QL                                                                                  | ACE inhibitor, DPP-IV inhibitor                                                                                                                                                                |
| SHQKIRHFNEGDVL        | 1679.86 | 0.30 | 0.11 | Glycinin | IR, GD, EG, QK, FNE, VL, RHF, FN, HF, KI, NE,<br>RH, SH                                                 | ACE inhibitor, antioxidant, glucose uptake stimulation, DPP-IV<br>inhibitor                                                                                                                    |
| YKNGIYSPHWN           | 1378.51 | 0.42 | 0.07 | Glycinin | IY, GI, NG, YK, PH, IYSPH, PHW, SP, WN, HW,<br>YS                                                       | ACE inhibitor, antioxidant, DPP-IV inhibitor                                                                                                                                                   |
| FYNPKAGRIST           | 1253.42 | 0.29 | 0.13 | Glycinin | FY, AG, GR, KA, FYN, ST, YN, NP, PK, RI                                                                 | ACE inhibitor, DPP-IV inhibitor                                                                                                                                                                |
| GPLVNPESQQGSPR        | 1465.59 | 0.30 | 0.14 | Glycinin | GP, PR, GPL, PL, GS, QG, VNP, LV,<br>VNPESQQGSPR, NP, ES, QG, QQ, VN, PE                                | ACE inhibitor, antioxidant, antiamnesic, antithrombotic, glucose<br>uptake stimulation, regulating the stomach mucosal membrane<br>activity, $\alpha$ -glucosidase inhibitor, DPP-IV inhibitor |
| YKNGIYSPHW            | 1264.41 | 0.48 | 0.07 | Glycinin | IY, GI, NG, YK, PH, IYSPH, PHW, SP, HW, YS                                                              | ACE inhibitor, antioxidant, DPP-IV inhibitor                                                                                                                                                   |
| NALEPDHRVESEGGL       | 1622.71 | 0.27 | 0.11 | Glycinin | GL, GG, EG, VE, ALEP, SE, ALEPDHR,<br>NALEPDHRVESEGG, EP, AL, ES, HR, NA                                | ACE inhibitor, antioxidant, stimulating vasoactive substance release,<br>$\alpha$ -glucosidase inhibitor, DPP-IV inhibitor                                                                     |

|                        |         |      |      |          |                                                                  |                                                                                                                                                                                                              |
|------------------------|---------|------|------|----------|------------------------------------------------------------------|--------------------------------------------------------------------------------------------------------------------------------------------------------------------------------------------------------------|
| YKNGIYSPHWNLNA         | 1676.85 | 0.52 | 0.10 | Glycinin | IY, GI, NG, YK, LN, PH, IYSPH, PHW, SP, HW, YS                   | ACE inhibitor, antioxidant, DPP-IV inhibitor                                                                                                                                                                 |
| SGFSKHFLAQSFNTNED      | 1929.03 | 0.35 | 0.07 | Glycinin | LA, GF, SG, SF, FL, FN, HF, KH, NE, NT, QS, SK, TN               | ACE inhibitor, DPP-IV inhibitor                                                                                                                                                                              |
| VIPPGVPYWTYNTGDE       | 1807.98 | 0.31 | 0.09 | Glycinin | IPP, PG, YW, IP, VP, GV, GD, TG, PP, YN, TY, PY, PPG, WT, NT, VI | ACE inhibitor, antioxidant, antiinflammation, $\alpha$ -amylase inhibitor, antiamnestic, antithrombotic, regulating the stomach mucosal membrane activity, $\alpha$ -glucosidase inhibitor, DPP-IV inhibitor |
| HENIARPSRADF           | 1412.53 | 0.30 | 0.13 | Glycinin | IA, RP, RA, AR, DF, ADF, AD, HE, PS                              | ACE inhibitor, antioxidant, $\alpha$ -glucosidase inhibitor, DPP-IV inhibitor                                                                                                                                |
| FSKHFLAQSF             | 1211.39 | 0.57 | 0.08 | Glycinin | LA, SF, FL, HF, KH, QS, SK                                       | ACE inhibitor, DPP-IV inhibitor                                                                                                                                                                              |
| FSKHFLAQSFNTNE         | 1669.81 | 0.30 | 0.08 | Glycinin | LA, SF, FL, FN, HF, KH, NE, NT, QS, TN                           | ACE inhibitor, DPP-IV inhibitor                                                                                                                                                                              |
| SGFSKHFLAQSF           | 1355.52 | 0.72 | 0.07 | Glycinin | LA, GF, SG, SF, FL, HF, KH, QS                                   | ACE inhibitor, DPP-IV inhibitor                                                                                                                                                                              |
| NSLTLPALRQ             | 1112.29 | 0.24 | 0.49 | Glycinin | LR, LP, SL, PA, AL, LT, TL                                       | ACE inhibitor, DPP-IV inhibitor                                                                                                                                                                              |
| LAGNPDIEYPET           | 1318.40 | 0.30 | 0.07 | Glycinin | YP, LA, AG, EY, IE, IEY, NP, ET, PE                              | ACE inhibitor, $\alpha$ -glucosidase inhibitor, DPP-IV inhibitor                                                                                                                                             |
| KLQSPDDERKQIV          | 1555.75 | 0.20 | 0.20 | Glycinin | KL, LQ, ER, IV, SP, QI, QS, RK                                   | ACE inhibitor, glucose uptake stimulation, DPP-IV inhibitor                                                                                                                                                  |
| IIIAQGKGALG            | 1040.27 | 0.37 | 0.13 | Glycinin | IA, GA, KG, GK, QG, LG, IAQ, II, AL                              | ACE inhibitor, glucose uptake stimulation, DPP-IV inhibitor                                                                                                                                                  |
| YNPKAGRISTL            | 1219.41 | 0.31 | 0.20 | Glycinin | AG, GR, KA, ST, YN, NP, PK, RI, TL                               | ACE inhibitor, DPP-IV inhibitor                                                                                                                                                                              |
| DQTPRVFY               | 1025.13 | 0.45 | 0.15 | Glycinin | VF, PR, FY, TP, DQ, QT                                           | ACE inhibitor, DPP-IV inhibitor                                                                                                                                                                              |
| VIPPGVPYWTYNTGDE<br>PV | 2004.23 | 0.20 | 0.10 | Glycinin | IPP, PG, YW, IP, VP, GV, GD, TG, PP, YN, TY, PY, PPG, WT, NT, VI | ACE inhibitor, antioxidant, antiinflammation, antiamnestic, $\alpha$ -amylase inhibitor, antithrombotic, regulating the stomach mucosal membrane activity, $\alpha$ -glucosidase inhibitor, DPP-IV inhibitor |
| DEDEQIPSHPPRRPSHG      | 1954.05 | 0.38 | 0.09 | Glycinin | PR, IP, HG, SHP, RR, PP, DEQIPSHPPR, PS, QI, SH                  | ACE inhibitor, antioxidant, $\alpha$ -glucosidase inhibitor, DPP-IV inhibitor                                                                                                                                |
| SGFSKHFLAQSF           | 1208.34 | 0.46 | 0.08 | Glycinin | LA, GF, SG, FL, HF, KH, QS, SK                                   | ACE inhibitor, DPP-IV inhibitor                                                                                                                                                                              |
| FSKHFLAQSF             | 1064.21 | 0.34 | 0.09 | Glycinin | LA, FL, HF, KH, QS, SK                                           | ACE inhibitor, DPP-IV inhibitor                                                                                                                                                                              |
| VFDGELRRGQ             | 1176.30 | 0.28 | 0.25 | Glycinin | VF, GQ, GE, DG, RR, RG, LR, EL                                   | ACE inhibitor, antioxidant, neuropeptide, DPP-IV inhibitor                                                                                                                                                   |
| FYLAGNPDIEY            | 1301.42 | 0.29 | 0.06 | Glycinin | YL, FY, AG, EY, LA, IE, IEY, NP                                  | ACE inhibitor, neuropeptide, DPP-IV inhibitor                                                                                                                                                                |

|                   |         |      |      |          |                                                                      |                                                                                                                                                                                                              |
|-------------------|---------|------|------|----------|----------------------------------------------------------------------|--------------------------------------------------------------------------------------------------------------------------------------------------------------------------------------------------------------|
| NSLTLPALRQFQLSAQY | 1950.22 | 0.30 | 0.34 | Glycinin | FQ, LR, LP, PA, AL, SL, LT, QF, QL, QY, TL                           | ACE inhibitor, DPP-IV inhibitor                                                                                                                                                                              |
| PALRQFQLS         | 1059.23 | 0.33 | 0.31 | Glycinin | FQ, LR, PA, AL, QF, QL                                               | ACE inhibitor, DPP-IV inhibitor                                                                                                                                                                              |
| VIPPGVPYWTYNTGD   | 1678.86 | 0.47 | 0.10 | Glycinin | IPP, PG, YW, IP, VP, GV, GD, TG, PP, YN, TY, PY, PPG, WT, NT, VI     | ACE inhibitor, antioxidant, antiinflammation, antiamnestic, $\alpha$ -amylase inhibitor, antithrombotic, regulating the stomach mucosal membrane activity, $\alpha$ -glucosidase inhibitor, DPP-IV inhibitor |
| NSLTLPALRQFQLS    | 1587.84 | 0.35 | 0.35 | Glycinin | FQ, LR, LP, PA, AL, SL, LT, QF, QL, TL                               | ACE inhibitor, DPP-IV inhibitor                                                                                                                                                                              |
| VIPPGVPYWTYN      | 1405.62 | 0.69 | 0.10 | Glycinin | IPP, PG, YW, IP, VP, GV, GD, TG, PP, YN, TY, PY, PPG, WT, NT, VI     | ACE inhibitor, antioxidant, antiinflammation, antiamnestic, $\alpha$ -amylase inhibitor, antithrombotic, regulating the stomach mucosal membrane activity, $\alpha$ -glucosidase inhibitor, DPP-IV inhibitor |
| DFYNPKAG          | 910.98  | 0.63 | 0.08 | Glycinin | FY, AG, KA, FYN, DF, YN, DFY, NP, PK                                 | ACE inhibitor, DPP-IV inhibitor                                                                                                                                                                              |
| NNQLDQTPRV        | 1184.27 | 0.21 | 0.31 | Glycinin | PR, TP, DQ, NN, NQ, QL, QT                                           | ACE inhibitor, DPP-IV inhibitor                                                                                                                                                                              |
| LVIPPGVPYWTYNTGDE | 1921.14 | 0.27 | 0.10 | Glycinin | IPP, PG, YW, IP, VP, GV, GD, TG, PP, YN, TY, PY, PPG, WT, NT, VI     | ACE inhibitor, antioxidant, antiinflammation, antiamnestic, $\alpha$ -amylase inhibitor, antithrombotic, regulating the stomach mucosal membrane activity, $\alpha$ -glucosidase inhibitor, DPP-IV inhibitor |
| IIAQGKGAL         | 983.22  | 0.32 | 0.13 | Glycinin | IA, GA, KG, GK, QG, IAQ, II, AL                                      | ACE inhibitor, glucose uptake stimulation, DPP-IV inhibitor                                                                                                                                                  |
| NIARPSRADF        | 1146.27 | 0.37 | 0.16 | Glycinin | IA, RP, RA, AR, DF, ADF, AD, PS                                      | ACE inhibitor, antioxidant, $\alpha$ -glucosidase inhibitor, DPP-IV inhibitor                                                                                                                                |
| GLHLPSYSPYPRM     | 1517.77 | 0.79 | 0.11 | Glycinin | LHLP, PYP, YPR, YP, PSY, GL, HL, NG, SY, LP, LH, LHL, PY, NR, PS, RN | ACE inhibitor, antioxidant, antiinflammation, $\alpha$ -glucosidase inhibitor, DPP-IV inhibitor                                                                                                              |
| NNQLDQTPRVFY      | 1494.63 | 0.24 | 0.20 | Glycinin | VF, PR, FY, TP, DQ, NN, NQ, QL, QT                                   | ACE inhibitor, DPP-IV inhibitor                                                                                                                                                                              |
| YLAGNPDIIEYPET    | 1481.58 | 0.23 | 0.07 | Glycinin | YL, YP, LA, AG, EY, IE, IEY, NP, ET, PE                              | ACE inhibitor, neuropeptide, $\alpha$ -glucosidase inhibitor, DPP-IV inhibitor                                                                                                                               |
| LEPDHRVESEGGL     | 1437.53 | 0.23 | 0.10 | Glycinin | GL, GG, EG, VE, SE, EP, EG, ES, HR                                   | ACE inhibitor, stimulating vasoactive substance release, $\alpha$ -glucosidase inhibitor, DPP-IV inhibitor                                                                                                   |
| VFDGELRRGQL       | 1289.46 | 0.36 | 0.31 | Glycinin | VF, GQ, GE, DG, RR, RG, LR, EL, QL                                   | ACE inhibitor, antioxidant, neuropeptide, DPP-IV inhibitor                                                                                                                                                   |
| NNQLDQTPRVF       | 1331.45 | 0.32 | 0.26 | Glycinin | VF, PR, TP, DQ, NN, NQ, QL, QT                                       | ACE inhibitor, DPP-IV inhibitor                                                                                                                                                                              |
| LLVVPQNFVVA       | 1198.47 | 0.22 | 0.30 | Glycinin | VP, NF, PQ, LV, LL, VA, VV, NF, QN                                   | ACE inhibitor, glucose uptake stimulation, DPP-IV inhibitor                                                                                                                                                  |

|                          |         |      |      |          |                                                                          |                                                                                                                                                                                                             |
|--------------------------|---------|------|------|----------|--------------------------------------------------------------------------|-------------------------------------------------------------------------------------------------------------------------------------------------------------------------------------------------------------|
| YKNGIYSPHWNL             | 1491.67 | 0.65 | 0.09 | Glycinin | IY, GI, NG, YK, PH, IYSPH, PHW, SP, WN, HW, YS                           | ACE inhibitor, antioxidant, DPP-IV inhibitor                                                                                                                                                                |
| GLHLPSYSPYPR             | 1386.57 | 0.67 | 0.11 | Glycinin | LHLP, PYP, YPR, YP, PSY, GL, HL, NG, SY, LP, LH, LHL, PY, PS             | ACE inhibitor, antioxidant, antiinflammation, $\alpha$ -glucosidase inhibitor, DPP-IV inhibitor                                                                                                             |
| LVVPQNF                  | 815.97  | 0.30 | 0.16 | Glycinin | VP, NF, PQ, LV, VV, QN                                                   | ACE inhibitor, glucose uptake stimulation, DPP-IV inhibitor                                                                                                                                                 |
| LVIPPGVPY                | 954.18  | 0.34 | 0.11 | Glycinin | IPP, PG, IP, VP, GV, PP, PY, PPG, VI                                     | ACE inhibitor, antiinflammation, antiamnesic, $\alpha$ -amylase inhibitor, antithrombotic, regulating the stomach mucosal membrane activity, $\alpha$ -glucosidase inhibitor, DPP-IV inhibitor              |
| YNPKAGRISTLNSLT          | 1634.85 | 0.37 | 0.20 | Glycinin | AG, GR, KA, LN, ST, YN, SL, NP, LT, PK, RI, TL                           | ACE inhibitor, DPP-IV inhibitor                                                                                                                                                                             |
| SKHFLAQSF                | 1064.21 | 0.51 | 0.09 | Glycinin | LA, SF, FL, HF, KH, QS, SK                                               | ACE inhibitor, DPP-IV inhibitor                                                                                                                                                                             |
| FNEGDVLVIPPGVPY          | 1615.85 | 0.36 | 0.08 | Glycinin | IPP, PG, IP, VP, GV, GD, EG, PP, FNE, PPG, VI                            | ACE inhibitor, antioxidant, antiinflammation, antiamnesic, $\alpha$ -amylase inhibitor, antithrombotic, regulating the stomach mucosal membrane activity, $\alpha$ -glucosidase inhibitor, DPP-IV inhibitor |
| NIARPSRADFYNPAG          | 1776.97 | 0.28 | 0.19 | Glycinin | FY, IA, RP, RA, AG, AR, KA, FYN, DF, YN, DFY, RADFY, ADF, NP, AD, PK, PS | ACE inhibitor, antioxidant, $\alpha$ -glucosidase inhibitor, DPP-IV inhibitor                                                                                                                               |
| LVVPQNFVVA               | 1085.31 | 0.20 | 0.25 | Glycinin | VP, NF, PQ, LV, VA, VV, QN                                               | ACE inhibitor, glucose uptake stimulation, DPP-IV inhibitor                                                                                                                                                 |
| WNSQHPEL                 | 1010.07 | 0.50 | 0.10 | Glycinin | HP, EL, PEL, WN, QH, PE                                                  | ACE inhibitor, antioxidant, $\alpha$ -glucosidase inhibitor, DPP-IV inhibitor                                                                                                                               |
| SVISPKWQEQ               | 1201.34 | 0.20 | 0.10 | Glycinin | KW, SP, WQ, PK, QE, SV, VI                                               | ACE inhibitor, DPP-IV inhibitor                                                                                                                                                                             |
| SGFSKHFLAQSFNTNED<br>IAE | 2242.39 | 0.27 | 0.07 | Glycinin | IA, LA, GF, SG, SF, IAE, FL, AE, FN, HF, KH, NE, NT, QS, SK, TN          | ACE inhibitor, DPP-IV inhibitor                                                                                                                                                                             |
| DFYNPKAGRIST             | 1368.51 | 0.36 | 0.11 | Glycinin | FY, AG, GR, KA, FYN, DF, ST, YN, DFY, NP, PK, RI                         | ACE inhibitor, DPP-IV inhibitor                                                                                                                                                                             |
| PALRQFQLSA               | 1130.31 | 0.30 | 0.34 | Glycinin | FQ, LR, PA, AL, QF, QL                                                   | ACE inhibitor, DPP-IV inhibitor                                                                                                                                                                             |
| FRAIPSEV                 | 918.06  | 0.23 | 0.10 | Glycinin | AIP, IP, RA, FR, AI, EV, SE, PS                                          | ACE inhibitor, stimulating vasoactive substance release, DPP-IV inhibitor                                                                                                                                   |
| DQTPRVF                  | 861.95  | 0.51 | 0.20 | Glycinin | VF, PR, TP, DQ, QT                                                       | ACE inhibitor, DPP-IV inhibitor                                                                                                                                                                             |

|                          |         |      |      |                 |                                                                         |                                                                                                                                                                                                                                         |
|--------------------------|---------|------|------|-----------------|-------------------------------------------------------------------------|-----------------------------------------------------------------------------------------------------------------------------------------------------------------------------------------------------------------------------------------|
| YLKDVF                   | 783.92  | 0.41 | 0.13 | Glycinin        | VF, YL, KD, LK                                                          | ACE inhibitor, antioxidant, neuropeptide, DPP-IV inhibitor                                                                                                                                                                              |
| ALEPDHRVESEGGL           | 1508.61 | 0.31 | 0.12 | Glycinin        | GL, GG, EG, VE, ALEP, SE, ALEPDHR, EP, AL, ES, HR                       | ACE inhibitor, antioxidant, stimulating vasoactive substance release, $\alpha$ -glucosidase inhibitor, DPP-IV inhibitor                                                                                                                 |
| RQFQLSA                  | 848.96  | 0.25 | 0.26 | Glycinin        | FQ, QF, QL                                                              | ACE inhibitor, DPP-IV inhibitor                                                                                                                                                                                                         |
| GIYSPHWN                 | 973.06  | 0.73 | 0.06 | Glycinin        | IY, GI, PH, IYSPH, PHW, SP, WN, HW, YS                                  | ACE inhibitor, antioxidant, DPP-IV inhibitor                                                                                                                                                                                            |
| ISLLDTSNF                | 1009.12 | 0.25 | 0.07 | Glycinin        | NF, LL, SL, TS                                                          | ACE inhibitor, glucose uptake stimulation, DPP-IV inhibitor                                                                                                                                                                             |
| EGGSVLSGFSKHFLAQS        | 1750.93 | 0.53 | 0.08 | Glycinin        | LA, GF, GS, GG, SG, EG, VL, SVL, FL, HF, KH, QS, SK, SV                 | ACE inhibitor, antioxidant, glucose uptake stimulation, DPP-IV inhibitor                                                                                                                                                                |
| LKYEGNWGPL               | 1176.34 | 0.64 | 0.20 | Glycinin        | GP, GPL, PL, WG, EG, KY, YE, LK, NW                                     | ACE inhibitor, antioxidant, antiamnesic, antithrombotic, regulating the stomach mucosal membrane activity, DPP-IV inhibitor                                                                                                             |
| VLVIPPGVPYWTYNTG<br>DE   | 2020.27 | 0.27 | 0.12 | Glycinin        | IPP, PG, YW, IP, VP, GV, GD, TG, PP, YN, TY, PY, PPG, WT, NT, VI        | ACE inhibitor, antioxidant, antiinflammation, antiamnesic, $\alpha$ -amylase inhibitor, antithrombotic, glucose uptake stimulation, regulating the stomach mucosal membrane activity, $\alpha$ -glucosidase inhibitor, DPP-IV inhibitor |
| LDTSNFNQQL               | 1165.22 | 0.26 | 0.10 | Glycinin        | NF, FN, NN, NQ, QL, TS                                                  | ACE inhibitor, DPP-IV inhibitor                                                                                                                                                                                                         |
| EDEDDEDEQIPSHPPRR        | 2064.07 | 0.29 | 0.08 | Glycinin        | PR, IP, SHP, RR, HP, DEQIPSHPPR, PP, PS, QI, SH                         | ACE inhibitor, antioxidant, $\alpha$ -glucosidase inhibitor, DPP-IV inhibitor                                                                                                                                                           |
| EGGLSVISPKWQEQQ          | 1685.85 | 0.20 | 0.11 | Glycinin        | KW, GL, GG, EG, SP, WQ, PK, QE, QQ, SV, VI                              | ACE inhibitor, DPP-IV inhibitor                                                                                                                                                                                                         |
| VIPPGVPY                 | 841.02  | 0.42 | 0.08 | Glycinin        | IPP, PG, IP, VP, GV, PP, PY, PPG, VI                                    | ACE inhibitor, antiinflammation, antiamnesic, $\alpha$ -amylase inhibitor, antithrombotic, regulating the stomach mucosal membrane activity, $\alpha$ -glucosidase inhibitor, DPP-IV inhibitor                                          |
| VIPPGVP                  | 677.84  | 0.46 | 0.12 | Glycinin        | IPP, PG, IP, VP, GV, PP, PPG, VI                                        | ACE inhibitor, antiinflammation, antiamnesic, $\alpha$ -amylase inhibitor, antithrombotic, regulating the stomach mucosal membrane activity, $\alpha$ -glucosidase inhibitor, DPP-IV inhibitor                                          |
| FAFGINAENNQRNFLA<br>GSKD | 2213.39 | 0.23 | 0.12 | Conglycin<br>in | AF, LA, GI, AG, FG, GS, NF, AGS, KD, FA, FL, AE, IN, NA, NN, NQ, RN, SK | ACE inhibitor, antioxidant, DPP-IV inhibitor                                                                                                                                                                                            |

|                        |         |      |      |                 |                                                                         |                                                                                                                                                               |
|------------------------|---------|------|------|-----------------|-------------------------------------------------------------------------|---------------------------------------------------------------------------------------------------------------------------------------------------------------|
| RSRDPIYSNKLKGL         | 1646.91 | 0.61 | 0.27 | Conglycin<br>in | IY, GK, LG, NKL, KL, NK, DP, PI, YS                                     | ACE inhibitor, antioxidant, DPP-IV inhibitor                                                                                                                  |
| LQRFNKRSQLQNLRD        | 2044.30 | 0.28 | 0.57 | Conglycin<br>in | RF, KR, NK, LQ, LR, NLR, FN, NL, QL, QN, QQ                             | ACE inhibitor, DPP-IV inhibitor                                                                                                                               |
| YVVNPNDNENLRM          | 1578.72 | 0.29 | 0.13 | Conglycin<br>in | VNP, YV, LR, NLR, LRM, VV, NP, DN, ND, NL,<br>RM, VN                    | ACE inhibitor, DPP-IV inhibitor                                                                                                                               |
| FEITPEKNPQLRDLDVF<br>L | 2174.48 | 0.39 | 0.15 | Conglycin<br>in | VF, EI, PQ, EK, TP, LR, VFL, KNPQLR,<br>EITPEKNPQLR, NP, FL, QL, PE     | ACE inhibitor, antioxidant, fatty acid synthase inhibitor, $\alpha$ -<br>glucosidase inhibitor, DPP-IV inhibitor                                              |
| SYNLQSGDALRVPAGT<br>T  | 1749.90 | 0.21 | 0.25 | Conglycin<br>in | VP, AG, DA, GT, SG, GD, SY, LQ, YN, LR, YNL,<br>NLQ, PA, AL, NL, QS, TT | ACE inhibitor, antioxidant, antiinflammation, DPP-IV inhibitor                                                                                                |
| PIYSNKLKGL             | 1132.37 | 0.67 | 0.18 | Conglycin<br>in | IY, GK, LG, NKL, KL, NK, PI, YS                                         | ACE inhibitor, antioxidant, DPP-IV inhibitor                                                                                                                  |
| QSGDALRVPAGTT          | 1272.38 | 0.37 | 0.30 | Conglycin<br>in | VP, AG, DA, GT, SG, GD, LR, PA, AL, QS, TT                              | ACE inhibitor, DPP-IV inhibitor                                                                                                                               |
| VDMNEGALFLPHFNSK<br>A  | 1890.14 | 0.45 | 0.11 | Conglycin<br>in | LF, GA, EG, KA, PH, DM, LP, PHF, AL, FN, HF,<br>MN, NE, SK, VD          | ACE inhibitor, antioxidant, DPP-IV inhibitor                                                                                                                  |
| LAFPGSAKDIENTLIKSQ     | 1831.10 | 0.26 | 0.11 | Conglycin<br>in | PG, FP, AFP, AF, LA, GS, IE, LI, KD, LAF, KS, NL                        | ACE inhibitor, antioxidant, antiamnesic, antithrombotic, glucose<br>uptake stimulation, regulating the stomach mucosal membrane<br>activity, DPP-IV inhibitor |
| FKNQYGHVRVLQ           | 1488.71 | 0.22 | 0.27 | Conglycin<br>in | YG, GH, YR, LQ, VL, VR, HV, NQ, QY                                      | ACE inhibitor, antiinflammation, glucose uptake stimulation, DPP-<br>IV inhibitor                                                                             |
| SVVDMNEGALFLPHFN<br>S  | 1877.10 | 0.44 | 0.08 | Conglycin<br>in | LF, GA, EG, KA, PH, DM, LP, PHF, VV, AL, FN,<br>HF, MN, NE, SV, VD      | ACE inhibitor, antioxidant, DPP-IV inhibitor                                                                                                                  |
| FLSSTQAQQSYLQG         | 1557.68 | 0.21 | 0.11 | Conglycin<br>in | YL, QG, SY, LQ, TQ, ST, FL, QA, QQ, QS, TQ                              | ACE inhibitor, neuropeptide, DPP-IV inhibitor                                                                                                                 |

|                        |         |      |      |                 |                                                                                      |                                                                                                                                                     |
|------------------------|---------|------|------|-----------------|--------------------------------------------------------------------------------------|-----------------------------------------------------------------------------------------------------------------------------------------------------|
| GALFLPHFNS             | 1102.26 | 0.67 | 0.08 | Conglycin<br>in | LF, GA, PH, LP, PHF, FL, AL, FN, HF                                                  | ACE inhibitor, antioxidant, DPP-IV inhibitor                                                                                                        |
| GALFLPHFNSKA           | 1301.51 | 0.77 | 0.14 | Conglycin<br>in | LF, GA, KA, PH, LP, PHF, FL, AL, FN, HF                                              | ACE inhibitor, antioxidant, DPP-IV inhibitor                                                                                                        |
| FLPHFNSKA              | 1060.22 | 0.63 | 0.10 | Conglycin<br>in | KA, PH, LP, PHF, FL, FN, HF                                                          | ACE inhibitor, antioxidant, DPP-IV inhibitor                                                                                                        |
| LFLPHFNSKA             | 1173.38 | 0.55 | 0.13 | Conglycin<br>in | LF, KA, PH, LP, PHF, FL, FN, SK, HF                                                  | ACE inhibitor, antioxidant, DPP-IV inhibitor                                                                                                        |
| LPHHADADYL             | 1151.24 | 0.33 | 0.10 | Conglycin<br>in | YL, DA, PH, DY, LP, PHH, LPHH, HH, HA, AD                                            | ACE inhibitor, antioxidant, neuropeptide, $\alpha$ -glucosidase inhibitor, DPP-IV inhibitor                                                         |
| FAFGINAENNQ            | 1224.29 | 0.21 | 0.07 | Conglycin<br>in | AF, GI, FG, FA, AE, IN, NA, NN, NQ                                                   | ACE inhibitor, DPP-IV inhibitor                                                                                                                     |
| VVNPNDNENLRM           | 1415.54 | 0.36 | 0.15 | Conglycin<br>in | VNP, LR, NLR, LRM, VV, NP, DN, ND, NL, RM, VN                                        | ACE inhibitor, DPP-IV inhibitor                                                                                                                     |
| NLQSGDALRVPAGTT        | 1499.64 | 0.26 | 0.32 | Conglycin<br>in | VP, AG, DA, GT, SG, GD, LQ, LR, NLQ, PA, AL, NL, QS, TT, RV                          | ACE inhibitor, antiinflammation, DPP-IV inhibitor                                                                                                   |
| FLSSTQAQQSYLQGFSK<br>N | 2034.21 | 0.23 | 0.12 | Conglycin<br>in | YL, GF, QG, SY, LQ, TQ, ST, FL, QA, QQ, QS, SK                                       | ACE inhibitor, neuropeptide, DPP-IV inhibitor                                                                                                       |
| QREPRRHKNKNPF          | 1706.93 | 0.35 | 0.52 | Conglycin<br>in | PR, NK, RR, HK, RHK, EP, NP, PF, RH                                                  | ACE inhibitor, antioxidant, DPP-IV inhibitor                                                                                                        |
| PHHADADYLI             | 1151.24 | 0.43 | 0.07 | Conglycin<br>in | YL, DA, PH, DY, LI, LP, PHH, HH, HA, AD                                              | ACE inhibitor, antioxidant, neuropeptide, glucose uptake stimulation, $\alpha$ -glucosidase inhibitor, DPP-IV inhibitor                             |
| FEITPEKNPQLRDLDFV      | 2061.32 | 0.32 | 0.13 | Conglycin<br>in | VF, EI, PQ, EK, TP, LR, KNPQLR, EITPEKNPQLR, NP, QL, VF, PE                          | ACE inhibitor, fatty acid synthase inhibitor, $\alpha$ -glucosidase inhibitor, DPP-IV inhibitor                                                     |
| FNSKPNTLLPHHADAD<br>D  | 1890.09 | 0.23 | 0.14 | Conglycin<br>in | LLP, DA, KP, PH, LP, LLL, LL, PHH, LLPH, LPHH, HH, LLPHH, HA, AD, FN, NT, PN, SK, TL | ACE inhibitor, antioxidant, stimulating vasoactive substance release, glucose uptake stimulation, $\alpha$ -glucosidase inhibitor, DPP-IV inhibitor |

|                |         |      |      |                 |                                                |                                                                                                                               |
|----------------|---------|------|------|-----------------|------------------------------------------------|-------------------------------------------------------------------------------------------------------------------------------|
| LAFPGSAKDIE    | 1261.40 | 0.26 | 0.09 | Conglycin<br>in | PG, FP, AFP, AF, LA, GS, IE, KD, LAF           | ACE inhibitor, antioxidant, anti-amnestic, antithrombotic, regulating the stomach mucosal membrane activity, DPP-IV inhibitor |
| LAFPGSAKD      | 905.02  | 0.27 | 0.13 | Conglycin<br>in | PG, FP, AFP, AF, LA, GS, KD, LAF               | ACE inhibitor, antioxidant, anti-amnestic, antithrombotic, regulating the stomach mucosal membrane activity, DPP-IV inhibitor |
| RDLDF          | 763.85  | 0.47 | 0.17 | Conglycin<br>in | VF                                             | ACE inhibitor, DPP-IV inhibitor                                                                                               |
| SGDALRVPAGTT   | 1144.25 | 0.40 | 0.26 | Conglycin<br>in | VP, AG, DA, GT, SG, GD, LQ, LR, PA, AL, TT, RV | ACE inhibitor, DPP-IV inhibitor                                                                                               |
| LAFPGSAKDIE    | 1374.56 | 0.42 | 0.11 | Conglycin<br>in | PG, FP, AFP, AF, LA, GS, IE, KD, LAF           | ACE inhibitor, antioxidant, anti-amnestic, antithrombotic, regulating the stomach mucosal membrane activity, DPP-IV inhibitor |
| LQSGDALRVPAGTT | 1385.54 | 0.30 | 0.33 | Conglycin<br>in | VP, AG, DA, GT, SG, GD, LQ, LR, PA, AL, TT, RV | ACE inhibitor, DPP-IV inhibitor                                                                                               |
| KNPQLRDLDF     | 1344.53 | 0.46 | 0.28 | Conglycin<br>in | VF, PQ, LR, KNPQLR, NP, QL                     | ACE inhibitor, fatty acid synthase inhibitor, DPP-IV inhibitor                                                                |
| GALFLPH        | 753.90  | 0.78 | 0.14 | Conglycin<br>in | LF, GA, PH, LP, FL, AL                         | ACE inhibitor, DPP-IV inhibitor                                                                                               |
| LAFPGSAK       | 789.93  | 0.36 | 0.17 | Conglycin<br>in | PG, FP, AFP, AF, LA, GS, LAF                   | ACE inhibitor, antioxidant, anti-amnestic, antithrombotic, regulating the stomach mucosal membrane activity, DPP-IV inhibitor |
| NSKPNTLLPH     | 1233.43 | 0.33 | 0.25 | Conglycin<br>in | LLP, KP, PH, LP, LLL, LL, LLPH, NT, PN, SK, TL | ACE inhibitor, antioxidant, stimulating vasoactive substance release, glucose uptake stimulation, DPP-IV inhibitor            |
| LFLPH          | 625.77  | 0.72 | 0.14 | Conglycin<br>in | LF, PH, LP, FL                                 | ACE inhibitor, DPP-IV inhibitor                                                                                               |
| LFLPHF         | 772.95  | 0.93 | 0.10 | Conglycin<br>in | LF, PH, LP, PHF, FL, HF                        | ACE inhibitor, antioxidant, DPP-IV inhibitor                                                                                  |
| FSKNIL         | 720.87  | 0.56 | 0.10 | Conglycin<br>in | IL, SK                                         | ACE inhibitor, glucose uptake stimulation, DPP-IV inhibitor                                                                   |



|                   |         |      |      |                 |                                                                                         |                                                                                                                                                                                                 |
|-------------------|---------|------|------|-----------------|-----------------------------------------------------------------------------------------|-------------------------------------------------------------------------------------------------------------------------------------------------------------------------------------------------|
| AFGINAENNQRN      | 1347.41 | 0.20 | 0.12 | Conglycin<br>in | AF, GI, FG, AE, IN, NA, NN, NQ, RN                                                      | ACE inhibitor, DPP-IV inhibitor                                                                                                                                                                 |
| FLAGSKDNVISQIPS   | 1575.78 | 0.21 | 0.08 | Conglycin<br>in | IP, LA, AG, GS, AGS, KD, FL, DN, NV, PS, QI,<br>SK, VI                                  | ACE inhibitor, antioxidant, DPP-IV inhibitor                                                                                                                                                    |
| YVVNPDNDENLRMIT   | 1792.98 | 0.22 | 0.12 | Conglycin<br>in | VNP, YV, LR, NLR, LRM, VV, NP, DN, NL, RM,<br>VN                                        | ACE inhibitor, DPP-IV inhibitor                                                                                                                                                                 |
| LAFPGSAKDIENTLIKS | 1702.97 | 0.32 | 0.11 | Conglycin<br>in | PG, FP, AFP, AF, LA, GS, IE, LI, KD, LAF, KS, NL                                        | ACE inhibitor, antioxidant, antiamnestic, antithrombotic, glucose<br>uptake stimulation, regulating the stomach mucosal membrane<br>activity, DPP-IV inhibitor                                  |
| SKPNTLLPHHADAD    | 1628.81 | 0.20 | 0.17 | Conglycin<br>in | LLP, DA, KP, PH, LP, LLL, LL, PHH, LLPH,<br>LPHH, HH, LLPHH, HA, AD, FN, NT, PN, SK, TL | ACE inhibitor, antioxidant, stimulating vasoactive substance release,<br>glucose uptake stimulation, $\alpha$ -glucosidase inhibitor, DPP-IV inhibitor                                          |
| LFLPHFNS          | 974.13  | 0.54 | 0.08 | Conglycin<br>in | LF, PH, LP, PHF, FL, FN. HF                                                             | ACE inhibitor, antioxidant, DPP-IV inhibitor                                                                                                                                                    |
| KIKLAIPVKNKPGRYDD | 1940.32 | 0.20 | 0.18 | Conglycin<br>in | PG, RY, AIP, IP, LA, GR, AI, KL, NK, KP, II, IKL,<br>KI, PV, VN, YD                     | ACE inhibitor, antioxidant, antiamnestic, antithrombotic, glucose<br>uptake stimulation, regulating the stomach mucosal membrane<br>activity, DPP-IV inhibitor                                  |
| LAFPGSAQDVERLLK   | 1643.90 | 0.34 | 0.33 | Conglycin<br>in | PG, RL, FP, AFP, AF, LA, GS, VE, ER, LL, LAK,<br>QD, VE                                 | ACE inhibitor, antioxidant, antiamnestic, antithrombotic, glucose<br>uptake stimulation, regulating the stomach mucosal membrane<br>activity, $\alpha$ -glucosidase inhibitor, DPP-IV inhibitor |
| LAFPGSAQDVERLLKK  | 1772.08 | 0.29 | 0.41 | Conglycin<br>in | PG, RL, FP, AFP, AF, LA, GS, VE, ER, LL, LAK,<br>QD, VE                                 | ACE inhibitor, antioxidant, antiamnestic, antithrombotic, glucose<br>uptake stimulation, regulating the stomach mucosal membrane<br>activity, $\alpha$ -glucosidase inhibitor, DPP-IV inhibitor |
| VDINEGALLPHFNSKA  | 1838.09 | 0.45 | 0.13 | Conglycin<br>in | LLP, GA, EG, KA, PH, LP, LLL, LL, LLPH, PHF,<br>AL, EG, FN, HF, IN, NE, SK, VD          | ACE inhibitor, antioxidant, stimulating vasoactive substance release,<br>glucose uptake stimulation, DPP-IV inhibitor                                                                           |
| LAFGINAENNQRN     | 1460.57 | 0.20 | 0.14 | Conglycin<br>in | AF, LA, GI, FG, LAF, AE, IN, NA, NN, NQ, RN                                             | ACE inhibitor, antioxidant, DPP-IV inhibitor                                                                                                                                                    |

|                         |         |      |      |                 |                                                                                                   |                                                                                                                                                                                                 |
|-------------------------|---------|------|------|-----------------|---------------------------------------------------------------------------------------------------|-------------------------------------------------------------------------------------------------------------------------------------------------------------------------------------------------|
| LQRFNKRSPQLENLRD        | 2014.27 | 0.33 | 0.47 | Conglycin<br>in | RF, KR, NK, LQ, PQ, LR, NLR, SP, FN, NL, QL                                                       | ACE inhibitor, DPP-IV inhibitor                                                                                                                                                                 |
| FQSKPNTILLPHHADAD       | 1904.11 | 0.20 | 0.11 | Conglycin<br>in | LLP, DA, KP, PH, FQ, IL, LP, LL, PHH, LLPH,<br>LPHH, HH, LLPHH, HA, AD, FN, NT, PN, SK, QS,<br>TI | ACE inhibitor, antioxidant, glucose uptake stimulation, $\alpha$ -<br>glucosidase inhibitor, DPP-IV inhibitor                                                                                   |
| INEGALLLPHFNS           | 1424.62 | 0.36 | 0.09 | Conglycin<br>in | LLP, GA, EG, PH, LP, LLL, LL, LLPH, PHF, AL,<br>EG, FN, HF, IN, NE                                | ACE inhibitor, antioxidant, stimulating vasoactive substance release,<br>glucose uptake stimulation, DPP-IV inhibitor                                                                           |
| INEGALLLPHFNSKA         | 1623.87 | 0.52 | 0.13 | Conglycin<br>in | LLP, GA, EG, PH, LP, LLL, LL, LLPH, PHF, AL,<br>EG, FN, HF, IN, NE, SK                            | ACE inhibitor, antioxidant, stimulating vasoactive substance release,<br>glucose uptake stimulation, DPP-IV inhibitor                                                                           |
| IKLAIPVKNKPG            | 1149.44 | 0.32 | 0.23 | Conglycin<br>in | PG, AIP, IP, LA, AI, KL, NK, KP, IKL, PV, VN                                                      | ACE inhibitor, antioxidant, antiamnestic, antithrombotic, regulating<br>the stomach mucosal membrane activity, DPP-IV inhibitor                                                                 |
| SRNPIYSNNFG             | 1268.35 | 0.56 | 0.07 | Conglycin<br>in | IY, FG, NF, NP, NN, PI, RN, YS                                                                    | ACE inhibitor, antioxidant, DPP-IV inhibitor                                                                                                                                                    |
| LAFGINAENNQRNFL         | 1720.91 | 0.40 | 0.14 | Conglycin<br>in | AF, LA, GI, FG, NF, LAF, AE, IN, NA, NN, NQ,<br>RN                                                | ACE inhibitor, antioxidant, DPP-IV inhibitor                                                                                                                                                    |
| LVNPHDHQNLKIIKL         | 1782.12 | 0.36 | 0.19 | Conglycin<br>in | KL, PH, VNP, LV, II, VNPHDHQN,<br>LVNPHDHQN, HDH, PHD, IKL, LK, NP, HD, KI,<br>NL, QN, VN         | ACE inhibitor, antioxidant, glucose uptake stimulation, DPP-IV<br>inhibitor                                                                                                                     |
| DRDSYNLHPGDAQRI<br>AGTT | 2184.31 | 0.20 | 0.16 | Conglycin<br>in | PG, IPA, IP, AG, DA, GT, GD, HP, LHPGDAQR,<br>YN, YNL, DR, LH, PA, NL, RI, SY, TT                 | ACE inhibitor, antioxidant, antiamnestic, antithrombotic, regulating<br>the stomach mucosal membrane activity, DPP-IV inhibitor                                                                 |
| INEGALLLPH              | 1076.26 | 0.33 | 0.14 | Conglycin<br>in | LLP, GA, EG, PH, LP, LLL, LL, LLPH, AL, EG, IN,<br>NE                                             | ACE inhibitor, antioxidant, stimulating vasoactive substance release,<br>glucose uptake stimulation, DPP-IV inhibitor                                                                           |
| LAFPGSAQDVERLLKK<br>QRE | 2185.51 | 0.21 | 0.45 | Conglycin<br>in | PG, RL, FP, AFP, AF, LA, GS, VE, ER, LL, LAK,<br>QD, VE                                           | ACE inhibitor, antioxidant, antiamnestic, antithrombotic, glucose<br>uptake stimulation, regulating the stomach mucosal membrane<br>activity, $\alpha$ -glucosidase inhibitor, DPP-IV inhibitor |

|                          |         |      |      |                 |                                                                                |                                                                                                                                                               |
|--------------------------|---------|------|------|-----------------|--------------------------------------------------------------------------------|---------------------------------------------------------------------------------------------------------------------------------------------------------------|
| LSSTQAQQSYLQGFSH<br>NILE | 2251.44 | 0.26 | 0.09 | Conglycin<br>in | YL, GF, QG, SY, LQ, TQ, IL, ST, QA, QQ, QS, SH                                 | ACE inhibitor, neuropeptide, glucose uptake stimulation, DPP-IV inhibitor                                                                                     |
| IKLAIPVKNKPGRYDDF        | 1846.16 | 0.31 | 0.14 | Conglycin<br>in | PG, RY, AIP, IP, LA, GR, AI, KL, NK, KP, DF, IKL, PV, VN                       | ACE inhibitor, antioxidant, antiamnestic, antithrombotic, regulating the stomach mucosal membrane activity, DPP-IV inhibitor                                  |
| LAFPGSAQDVERL            | 1402.57 | 0.43 | 0.19 | Conglycin<br>in | PG, RL, FP, AFP, AF, LA, GS, VE, ER, LL, LAK, QD, VE                           | ACE inhibitor, antioxidant, antiamnestic, antithrombotic, regulating the stomach mucosal membrane activity, $\alpha$ -glucosidase inhibitor, DPP-IV inhibitor |
| AIPVKNKPGRYDD            | 1344.49 | 0.27 | 0.13 | Conglycin<br>in | PG, RY, AIP, IP, GR, AI, NK, KP, PY, PV, VN                                    | ACE inhibitor, antioxidant, antiamnestic, antithrombotic, regulating the stomach mucosal membrane activity, DPP-IV inhibitor                                  |
| LSSVDINEGALLLPHFN<br>SKA | 2125.41 | 0.61 | 0.12 | Conglycin<br>in | LLP, GA, EG, KA, PH, LP, LLL, LL, LLPH, PHF, AL, EG, IN, NE, SV, VD            | ACE inhibitor, antioxidant, stimulating vasoactive substance release, glucose uptake stimulation, DPP-IV inhibitor                                            |
| QSKPNTILLPH              | 1247.46 | 0.38 | 0.16 | Conglycin<br>in | LLP, KP, PH, IL, LP, LL, LLPH, NT, PN, QS, SK                                  | ACE inhibitor, antioxidant, glucose uptake stimulation, DPP-IV inhibitor                                                                                      |
| QGFSHNILETSF             | 1379.49 | 0.49 | 0.06 | Conglycin<br>in | QF, QG, SF, IL, ET, GF, SH, TS                                                 | ACE inhibitor, glucose uptake stimulation, DPP-IV inhibitor                                                                                                   |
| PIYSNNFG                 | 910.98  | 0.70 | 0.05 | Conglycin<br>in | IY, FG, NF, NN, PI, YS                                                         | ACE inhibitor, antioxidant, DPP-IV inhibitor                                                                                                                  |
| LAIPVKNKPGRYD            | 1342.56 | 0.27 | 0.19 | Conglycin<br>in | PG, RY, AIP, IP, LA, GR, AI, NK, KP, PY, PV, VN, YD                            | ACE inhibitor, antioxidant, antiamnestic, antithrombotic, regulating the stomach mucosal membrane activity, DPP-IV inhibitor                                  |
| ILLPHHADADFL             | 1474.72 | 0.50 | 0.12 | Conglycin<br>in | LLP, DA, PH, DF, IL, LP, LL, PHH, LLPH, LPHH, HH, LLPHH, HA, AD                | ACE inhibitor, antioxidant, glucose uptake stimulation, $\alpha$ -glucosidase inhibitor, DPP-IV inhibitor                                                     |
| YLVNPHDHQNLKI            | 1590.80 | 0.27 | 0.12 | Conglycin<br>in | YL, PH, VNP, LV, VNPHDHQN, LVNPHDHQN, HDH, PHD, LK, NP, HD, KI, NL, PH, QN, VN | ACE inhibitor, antioxidant, neuropeptide, glucose uptake stimulation, DPP-IV inhibitor                                                                        |
| LFVLSGRAIL               | 1088.36 | 0.40 | 0.27 | Conglycin<br>in | LF, RA, GR, AI, SG, IL, VL, LFV                                                | ACE inhibitor, antioxidant, glucose uptake stimulation, DPP-IV inhibitor                                                                                      |

|                       |         |      |      |                 |                                                                       |                                                                                                                                 |
|-----------------------|---------|------|------|-----------------|-----------------------------------------------------------------------|---------------------------------------------------------------------------------------------------------------------------------|
| LAFGINAENNQRNF        | 1607.75 | 0.35 | 0.12 | Conglycin<br>in | AF, LA, GI, FG, NF, LAF, AE, IN, NA, NN, NQ,<br>RN                    | ACE inhibitor, antioxidant, DPP-IV inhibitor                                                                                    |
| YLVNPHDHQNL           | 1349.47 | 0.29 | 0.10 | Conglycin<br>in | YL, PH, VNP, LV, VNPHDHQN, LVNPHDHQN,<br>HDH, PHD, NP, HD, NL, QN, VN | ACE inhibitor, antioxidant, neuropeptide, glucose uptake stimulation,<br>DPP-IV inhibitor                                       |
| LQRFNKRSPQLENL        | 1743.00 | 0.37 | 0.43 | Conglycin<br>in | RF, KR, NK, LQ, PQ, SP, FN, NL, QL                                    | ACE inhibitor, DPP-IV inhibitor                                                                                                 |
| NLHPGDAQRIAGTT        | 1547.69 | 0.25 | 0.20 | Conglycin<br>in | PG, IPA, IP, AG, DA, GT, GD, HP, LHPGDAQR,<br>LH, PA, NL, RI, TT      | ACE inhibitor, antioxidant, antiamnestic, antithrombotic, regulating<br>the stomach mucosal membrane activity, DPP-IV inhibitor |
| LAFGINAENNQRNFLA<br>G | 1849.04 | 0.33 | 0.15 | Conglycin<br>in | AF, LA, GI, AG, FG, NF, LAF, AE, IN, NA, NN,<br>NQ, RN                | ACE inhibitor, antioxidant, DPP-IV inhibitor                                                                                    |
| LRSSNSFQTL            | 1152.27 | 0.32 | 0.15 | Conglycin<br>in | SF, FQ, LR, QT, TL                                                    | ACE inhibitor, DPP-IV inhibitor                                                                                                 |
| SSVDINEGALLLPHFNS     | 1813.00 | 0.57 | 0.08 | Conglycin<br>in | LLP, GA, EG, PH, LP, LLL, LL, LLPH, PHF, AL,<br>EG, IN, NE, SV, VD    | ACE inhibitor, antioxidant, stimulating vasoactive substance release,<br>glucose uptake stimulation, DPP-IV inhibitor           |
| LQRFNKRSPQLEN         | 1629.84 | 0.25 | 0.37 | Conglycin<br>in | RF, KR, NK, LQ, PQ, SP, FN, QL                                        | ACE inhibitor, DPP-IV inhibitor                                                                                                 |
| LQRFNKRSPQLENLR       | 1899.19 | 0.44 | 0.57 | Conglycin<br>in | RF, KR, NK, LQ, PQ, LR, NLR, SP, FN, QL                               | ACE inhibitor, DPP-IV inhibitor                                                                                                 |
| FVLSGRAIL             | 975.20  | 0.37 | 0.21 | Conglycin<br>in | RA, GI, AI, SG, IL, VL                                                | ACE inhibitor, glucose uptake stimulation, DPP-IV inhibitor                                                                     |
| LAFPGSAQDV            | 1004.11 | 0.23 | 0.10 | Conglycin<br>in | PG, RL, FP, AFP, AF, LA, GS, LAK, QD                                  | ACE inhibitor, antioxidant, antiamnestic, antithrombotic, regulating<br>the stomach mucosal membrane activity, DPP-IV inhibitor |
| FVLSGRA               | 748.88  | 0.37 | 0.26 | Conglycin<br>in | RA, GR, SG, VL                                                        | ACE inhibitor, glucose uptake stimulation, DPP-IV inhibitor                                                                     |
| SFHSEFEEIN            | 1238.28 | 0.22 | 0.04 | Conglycin<br>in | SF, EI, EF, EE, SE, HS, IN                                            | ACE inhibitor, hypolipidemic, stimulating vasoactive substance<br>release, DPP-IV inhibitor                                     |

|                |         |      |      |                 |                                                               |                                                                                                                                                                                          |
|----------------|---------|------|------|-----------------|---------------------------------------------------------------|------------------------------------------------------------------------------------------------------------------------------------------------------------------------------------------|
| LAFPGSAQDVERLL | 1515.73 | 0.41 | 0.23 | Conglycin<br>in | PG, RL, FP, AFP, AF, LA, GS, VE, ER, LL, LAK,<br>QD, VE       | ACE inhibitor, antioxidant, antiamnesic, antithrombotic, glucose uptake stimulation, regulating the stomach mucosal membrane activity, $\alpha$ -glucosidase inhibitor, DPP-IV inhibitor |
| LAFPGSAQDVE    | 1133.22 | 0.20 | 0.09 | Conglycin<br>in | PG, FP, AFP, AF, LA, GS, VE, LAF, QD, VE                      | ACE inhibitor, antioxidant, antiamnesic, antithrombotic, regulating the stomach mucosal membrane activity, $\alpha$ -glucosidase inhibitor, DPP-IV inhibitor                             |
| AIPVKNKPGRYDDF | 1491.67 | 0.52 | 0.11 | Conglycin<br>in | PG, RY, AIP, IP, GR, AI, NK, KP, PY, PV, VN, YD               | ACE inhibitor, antioxidant, antiamnesic, antithrombotic, regulating the stomach mucosal membrane activity, DPP-IV inhibitor                                                              |
| SPQLENLRD      | 1071.16 | 0.26 | 0.18 | Conglycin<br>in | PQ, LR, NLR, SP, NL, QL                                       | ACE inhibitor, DPP-IV inhibitor                                                                                                                                                          |
| LFVLSGRA       | 862.04  | 0.33 | 0.35 | Conglycin<br>in | LF, RA, GR, SG, VL, LFV                                       | ACE inhibitor, antioxidant, glucose uptake stimulation, DPP-IV inhibitor                                                                                                                 |
| SSVDINEGALLLPH | 1464.64 | 0.57 | 0.09 | Conglycin<br>in | LLP, GA, EG, PH, LP, LLL, LL, LLPH, AL, EG, IN,<br>NE, SV, VD | ACE inhibitor, antioxidant, stimulating vasoactive substance release, glucose uptake stimulation, DPP-IV inhibitor                                                                       |
| YRIVQF         | 824.98  | 0.37 | 0.12 | Conglycin<br>in | IVQ, IV, YR, QF, RI, VQ                                       | ACE inhibitor, neuropeptide, glucose uptake stimulation, DPP-IV inhibitor                                                                                                                |
| LAFPGSAQD      | 904.97  | 0.25 | 0.09 | Conglycin<br>in | PG, FP, AFP, AF, LA, GS, VE, LAF, QD                          | ACE inhibitor, antioxidant, antiamnesic, antithrombotic, regulating the stomach mucosal membrane activity, DPP-IV inhibitor                                                              |
| VLSGRAIL       | 828.02  | 0.22 | 0.31 | Conglycin<br>in | RA, GR, AI, SG, IL, VL                                        | ACE inhibitor, glucose uptake stimulation, DPP-IV inhibitor                                                                                                                              |
| FENQNGRIRL     | 1246.39 | 0.46 | 0.21 | Conglycin<br>in | RL, IR, GR, NG, NQ, QN                                        | ACE inhibitor, antioxidant, DPP-IV inhibitor                                                                                                                                             |
| EPFNLRSRNPI    | 1342.52 | 0.40 | 0.16 | Conglycin<br>in | LR, NLR, EP, NP, FN, NL, PF, PI, RN                           | ACE inhibitor, DPP-IV inhibitor                                                                                                                                                          |
| VREDENNPf      | 1119.16 | 0.22 | 0.10 | Conglycin<br>in | VR, NP, NN, PF                                                | ACE inhibitor, DPP-IV inhibitor                                                                                                                                                          |

|                          |         |      |      |                 |                                                                           |                                                                                                                                                                 |
|--------------------------|---------|------|------|-----------------|---------------------------------------------------------------------------|-----------------------------------------------------------------------------------------------------------------------------------------------------------------|
| RSRNPIYSNNFG             | 1424.54 | 0.37 | 0.10 | Conglycin<br>in | IY, FG, NF, NP, NN, PI, RN, YS                                            | ACE inhibitor, antioxidant, DPP-IV inhibitor                                                                                                                    |
| LVNPHDHQNLKI             | 1427.63 | 0.26 | 0.14 | Conglycin<br>in | PH, VNP, LV, VNPHDHQN, LVNPHDHQN, HDH,<br>PHD, LK, NP, HD, KI, NL, QN, VN | ACE inhibitor, antioxidant, glucose uptake stimulation, DPP-IV<br>inhibitor                                                                                     |
| LFENQNGRIR               | 1246.39 | 0.36 | 0.21 | Conglycin<br>in | IR, LF, GR, NG, NQ, QN                                                    | ACE inhibitor, antioxidant, DPP-IV inhibitor                                                                                                                    |
| LSSVDINEGALLPHFN<br>S    | 1926.16 | 0.43 | 0.09 | Conglycin<br>in | LLP, GA, EG, PH, LP, LLL, LL, LLPH, PHF, AL,<br>EG, FN, IN, NE, SV, VD    | ACE inhibitor, antioxidant, stimulating vasoactive substance release,<br>glucose uptake stimulation, DPP-IV inhibitor                                           |
| PFVVNATSNLN              | 1175.31 | 0.20 | 0.14 | Conglycin<br>in | LN, VV, AT, NA, NL, PF, TS                                                | ACE inhibitor, DPP-IV inhibitor                                                                                                                                 |
| SSVDINEGALLPHFNS         | 1813.00 | 0.57 | 0.08 | Conglycin<br>in | LLP, GA, EG, PH, LP, LLL, LL, LLPH, PHF, AL,<br>EG, FN, IN, NE, SV, VD    | ACE inhibitor, antioxidant, stimulating vasoactive substance release,<br>glucose uptake stimulation, DPP-IV inhibitor                                           |
| SQQQLQDSHQKIRHFN<br>EGDV | 2394.55 | 0.22 | 0.11 | Glycinin        | IR, GD, QK, LQ, EG, FNE, RHF, EG, FN, HF, KI,<br>NE, QD, QL, QQ, RH, SH   | ACE inhibitor, antioxidant, DPP-IV inhibitor                                                                                                                    |
| PALRQFGLS                | 988.15  | 0.47 | 0.27 | Glycinin        | GL, FG, LR, PA, AL, QF                                                    | ACE inhibitor, DPP-IV inhibitor                                                                                                                                 |
| KYQGNSGPLVNP             | 1273.41 | 0.31 | 0.13 | Glycinin        | GP, GPL, PL, QG, SG, KY, VNP, SGP, LV, NP, VN                             | ACE inhibitor, anti-amnestic, antithrombotic, glucose uptake<br>stimulation, DPP-IV inhibitor                                                                   |
| NSLTLPALRQFGLSAQ         | 1715.97 | 0.27 | 0.36 | Glycinin        | GL, FG, LR, LP, SL, PA, AL, LT, QF, TL                                    | ACE inhibitor, DPP-IV inhibitor                                                                                                                                 |
| NSLTLPALRQFGLS           | 1516.76 | 0.46 | 0.33 | Glycinin        | GL, FG, LR, LP, SL, PA, AL, LT, QF, TL                                    | ACE inhibitor, DPP-IV inhibitor                                                                                                                                 |
| QLKYQGNSGPLVNP           | 1514.70 | 0.39 | 0.17 | Glycinin        | GP, GPL, PL, QG, SG, KY, VNP, SGP, LV, NP, QL,<br>VN, YQ                  | ACE inhibitor, antioxidant, anti-amnestic, antithrombotic, glucose<br>uptake stimulation, regulating the stomach mucosal membrane<br>activity, DPP-IV inhibitor |
| IIVVQGKGAIGF             | 1201.47 | 0.36 | 0.09 | Glycinin        | GF, IG, GA, KG, GK, QG, AI, IV, II, VV, VQ                                | ACE inhibitor, glucose uptake stimulation, DPP-IV inhibitor                                                                                                     |
| PALRQFGLSAQ              | 1187.36 | 0.26 | 0.31 | Glycinin        | GL, FG, LR, PA, AL, QF                                                    | ACE inhibitor, DPP-IV inhibitor                                                                                                                                 |
| LAGNPDIHPET              | 1292.37 | 0.26 | 0.08 | Glycinin        | LA, AG, IE, HP, NP, EH, ET                                                | ACE inhibitor, $\alpha$ -glucosidase inhibitor, DPP-IV inhibitor                                                                                                |
| LTLPALRQFGLS             | 1315.58 | 0.38 | 0.42 | Glycinin        | GL, FG, LR, LP, PA, AL, LT, QF, TL                                        | ACE inhibitor, DPP-IV inhibitor                                                                                                                                 |

|                   |         |      |      |          |                                                                                   |                                                                                                                                                           |
|-------------------|---------|------|------|----------|-----------------------------------------------------------------------------------|-----------------------------------------------------------------------------------------------------------------------------------------------------------|
| NNQLDQNPRV        | 1197.27 | 0.25 | 0.25 | Glycinin | PR, NPR, NP, DQ, NN, NQ, QL, QN                                                   | ACE inhibitor, DPP-IV inhibitor                                                                                                                           |
| VRQLKYQGNSGPLVNP  | 1770.02 | 0.27 | 0.29 | Glycinin | GP, GPL, PL, QG, SG, VR, KY, VNP, SGP, LV, NP, QL, VN, YQ                         | ACE inhibitor, antioxidant, anti-amnestic, antithrombotic, glucose uptake stimulation, DPP-IV inhibitor                                                   |
| LKYQGNSGPLVNP     | 1386.57 | 0.31 | 0.16 | Glycinin | GP, GPL, PL, QG, SG, KY, VNP, SGP, LV, NP, VN, YQ                                 | ACE inhibitor, antioxidant, anti-amnestic, antithrombotic, glucose uptake stimulation, regulating the stomach mucosal membrane activity, DPP-IV inhibitor |
| NSLTLPALRQFGLSA   | 1587.84 | 0.37 | 0.35 | Glycinin | GL, FG, LR, LP, SL, PA, AL, LT, QF, TL                                            | ACE inhibitor, DPP-IV inhibitor                                                                                                                           |
| FYLAGNPDIHPET     | 1602.72 | 0.26 | 0.07 | Glycinin | YL, FY, LA, AG, IE, HP, EH, ET, PE                                                | ACE inhibitor, neuropeptide, $\alpha$ -glucosidase inhibitor, DPP-IV inhibitor                                                                            |
| PALRQFGLSA        | 1059.23 | 0.37 | 0.30 | Glycinin | GL, FG, LR, PA, AL, QF                                                            | ACE inhibitor, DPP-IV inhibitor                                                                                                                           |
| TLNRNGSHLPSYLPYPQ | 1957.18 | 0.22 | 0.14 | Glycinin | PYP, YL, YP, PSY, HL, GS, NG, SY, LN, PQ, GSH, LPYP, PYPQ, NG, NR, PS, RN, SH, TL | ACE inhibitor, antioxidant, anti-inflammation, neuropeptide, $\alpha$ -glucosidase inhibitor, DPP-IV inhibitor                                            |
| NRNGSHLPSYLPYPQ   | 1742.91 | 0.28 | 0.11 | Glycinin | PYP, YL, YP, PSY, HL, GS, NG, SY, PQ, GSH, LPYP, PYPQ, NG, NR, PS, RN, SH, TL     | ACE inhibitor, antioxidant, anti-inflammation, neuropeptide, $\alpha$ -glucosidase inhibitor, DPP-IV inhibitor                                            |
| PALRQFG           | 787.92  | 0.70 | 0.30 | Glycinin | FG, LR, PA, AL, QF                                                                | ACE inhibitor, DPP-IV inhibitor                                                                                                                           |
| PALRQFGLSAQY      | 1350.54 | 0.27 | 0.25 | Glycinin | GL, FG, LR, PA, AL, QY, QF                                                        | ACE inhibitor, DPP-IV inhibitor                                                                                                                           |
| YLAGNPDIHPET      | 1455.54 | 0.20 | 0.07 | Glycinin | YL, LA, AG, IE, HP, NP, EH, ET, PE                                                | ACE inhibitor, neuropeptide, $\alpha$ -glucosidase inhibitor, DPP-IV inhibitor                                                                            |
| AGNPDIHPET        | 1179.21 | 0.28 | 0.06 | Glycinin | AG, IE, HP, NP, EH, ET, PE                                                        | ACE inhibitor, $\alpha$ -glucosidase inhibitor, DPP-IV inhibitor                                                                                          |
| LTLPALRQFGLSAQ    | 1514.79 | 0.21 | 0.44 | Glycinin | GL, FG, LR, PA, AL, LT, QF, TL                                                    | ACE inhibitor, DPP-IV inhibitor                                                                                                                           |
| IIVVQGKGGAIGFA    | 1272.55 | 0.33 | 0.10 | Glycinin | GF, IG, GA, KG, GK, QG, AI, IV, II, FA, VV, VQ                                    | ACE inhibitor, glucose uptake stimulation, DPP-IV inhibitor                                                                                               |
| IIVVQGKGGAIGFAF   | 1419.73 | 0.52 | 0.09 | Glycinin | AF, GF, IG, GA, KG, GK, QG, AI, IV, II, FA, VV, VQ                                | ACE inhibitor, glucose uptake stimulation, DPP-IV inhibitor                                                                                               |
| PALRQFGL          | 901.08  | 0.78 | 0.38 | Glycinin | GL, FG, LR, PA, AL, QF                                                            | ACE inhibitor, DPP-IV inhibitor                                                                                                                           |

|                          |         |      |      |          |                                                                               |                                                                                                                                                          |
|--------------------------|---------|------|------|----------|-------------------------------------------------------------------------------|----------------------------------------------------------------------------------------------------------------------------------------------------------|
| RQLKYQGNSGPLVNP          | 1670.89 | 0.28 | 0.27 | Glycinin | GP, GPL, PL, QG, SG, KY, VNP, SGP, LV, NP, VN, YQ                             | ACE inhibitor, antioxidant, antiamnestic, antithrombotic, glucose uptake stimulation, regulating the stomach mucosal membrane activity, DPP-IV inhibitor |
| DVLVIPLGV                | 924.15  | 0.26 | 0.18 | Glycinin | PLG, PL, IG, GV, LG, LGV, PLG, VL, LV, VI                                     | ACE inhibitor, opioid, glucose uptake stimulation, DPP-IV inhibitor                                                                                      |
| NRNGSHLPSYLPYP           | 1614.78 | 0.35 | 0.11 | Glycinin | PYP, YL, YP, PSY, HL, GS, NG, SY, PQ, GSH, LPYP, PYPQ, NG, NR, PS, RN, SH, TL | ACE inhibitor, antioxidant, antiinflammation, neuropeptide, $\alpha$ -glucosidase inhibitor, DPP-IV inhibitor                                            |
| NGSHLPSYLPYPQ            | 1472.62 | 0.49 | 0.08 | Glycinin | PYP, YL, YP, PSY, HL, GS, NG, SY, PQ, GSH, LPYP, PYPQ, NG, NR, PS, RN, SH, TL | ACE inhibitor, antioxidant, antiinflammation, neuropeptide, $\alpha$ -glucosidase inhibitor, DPP-IV inhibitor                                            |
| YIKDVF                   | 783.92  | 0.39 | 0.07 | Glycinin | VF, KD, YI                                                                    | ACE inhibitor, DPP-IV inhibitor                                                                                                                          |
| NSLTLPALRQFG             | 1316.52 | 0.47 | 0.34 | Glycinin | FG, LR, LP, SL, PA, AL, LT, QF, TL                                            | ACE inhibitor, DPP-IV inhibitor                                                                                                                          |
| IDTNSFQNQLDQMPR          | 1806.97 | 0.20 | 0.11 | Glycinin | PR, SF, FQ, MP, DQ, FQ, NQ, QL, QN, TN                                        | ACE inhibitor, DPP-IV inhibitor                                                                                                                          |
| SGFAPEFLEHAFVVDQRQ<br>IV | 2161.44 | 0.48 | 0.10 | Glycinin | FAP, AF, AP, GF, SG, EF, DR, IV, FA, VV, HA, FL, DR, EH, QI, VD, PE, EF       | ACE inhibitor, hypolipidemic, glucose uptake stimulation, $\alpha$ -glucosidase inhibitor, DPP-IV inhibitor                                              |
| QNQLDQMPR                | 1129.26 | 0.48 | 0.25 | Glycinin | PR, MP, DQ, NQ, QL, QN                                                        | ACE inhibitor, DPP-IV inhibitor                                                                                                                          |
| SAQFGSLRKNAMEF           | 1456.68 | 0.82 | 0.22 | Glycinin | MF, FG, GS, LR, SLR, SL, NA, QF, RK                                           | ACE inhibitor, DPP-IV inhibitor                                                                                                                          |
| QNQLDQMPPRF              | 1432.62 | 0.74 | 0.34 | Glycinin | RF, PR, RR, MP, DQ, NQ, QL, QN                                                | ACE inhibitor, DPP-IV inhibitor                                                                                                                          |
| SAQFGSLRKNAME            | 1309.51 | 0.61 | 0.26 | Glycinin | FG, GS, LR, SLR, SL, NA, QF, RK                                               | ACE inhibitor, DPP-IV inhibitor                                                                                                                          |
| LKLSAQFGSLRKNAME         | 1664.00 | 0.51 | 0.42 | Glycinin | LKL, FG, GS, KL, LR, SLR, SL, LK, NA, QF, RK                                  | ACE inhibitor, antioxidant, DPP-IV inhibitor                                                                                                             |
| IDTNSFQNQLDQMPPRF        | 2110.33 | 0.37 | 0.15 | Glycinin | PR, PR, SF, RR, FQ, MP, DQ, NQ, QL, QN, TN                                    | ACE inhibitor, DPP-IV inhibitor                                                                                                                          |
| SGFAPEFLEHA              | 1204.30 | 0.53 | 0.07 | Glycinin | FAP, AP, GF, SG, EF, FA, HA, FL, EH, PE                                       | ACE inhibitor, hypolipidemic, $\alpha$ -glucosidase inhibitor, DPP-IV inhibitor                                                                          |
| IDTNSFQNQL               | 1179.25 | 0.21 | 0.07 | Glycinin | SF, FQ, NQ, QL, QN, TN                                                        | ACE inhibitor, DPP-IV inhibitor                                                                                                                          |
| YHFREGDLI                | 1149.27 | 0.24 | 0.08 | Glycinin | FR, GD, EG, YH, LI, HF                                                        | ACE inhibitor, glucose uptake stimulation, DPP-IV inhibitor                                                                                              |
| IYHFREGDL                | 1149.27 | 0.32 | 0.08 | Glycinin | IY, FR, GD, EG, YH, HF                                                        | ACE inhibitor, antioxidant, DPP-IV inhibitor                                                                                                             |
| EEKGAIVTVKGGL            | 1300.52 | 0.26 | 0.24 | Glycinin | VK, GA, GL, KG, GG, AI, EK, IV, EE, TV, VK, VT                                | ACE inhibitor, stimulating vasoactive substance release, glucose uptake stimulation, DPP-IV inhibitor                                                    |



|                  |         |      |      |          |                                                  |                                                                                                                                |
|------------------|---------|------|------|----------|--------------------------------------------------|--------------------------------------------------------------------------------------------------------------------------------|
| PFSFLVPPKESQR    | 1531.77 | 0.46 | 0.15 | Glycinin | VPP, VP, PPK, SF, PP, KE, LV, FL, ES, KE, PF, PK | ACE inhibitor, antiinflammation, antithrombotic, glucose uptake stimulation, $\alpha$ -glucosidase inhibitor, DPP-IV inhibitor |
| VIQQTfNL         | 962.11  | 0.29 | 0.12 | Glycinin | TF, FN, IQ, NL, QQ, QT, VI                       | ACE inhibitor, DPP-IV inhibitor                                                                                                |
| IYIQQGSGIFG      | 1182.34 | 0.45 | 0.05 | Glycinin | IY, IF, GI, FG, GS, QG, SG, IFG, IQ, QQ, YI      | ACE inhibitor, antioxidant, DPP-IV inhibitor                                                                                   |
| RRQqARQVKNNNPFSF | 1990.21 | 0.35 | 0.44 | Glycinin | VK, SF, RR, AR, NP, NN, PF, QA, QQ, QV           | ACE inhibitor, DPP-IV inhibitor                                                                                                |
| FQNQLDQMPrR      | 1432.62 | 0.66 | 0.33 | Glycinin | PR, RR, FQ, MP, DQ, NQ, QL, QN                   | ACE inhibitor, DPP-IV inhibitor                                                                                                |
| LKLSAQFGS        | 950.10  | 0.24 | 0.15 | Glycinin | LKL, FG, GS, KL, LK, QF                          | ACE inhibitor, antioxidant, DPP-IV inhibitor                                                                                   |

<sup>a</sup>From PeptideRanker. <sup>b</sup>From CPPpred. <sup>c</sup>From ExPASy ProtParam. <sup>d</sup>From BIOPEP.

Table S7. Potential bioactive peptides in IPP-potato protein.

| Peptide sequence | MW      | PeptideRanker score <sup>a</sup> | CPPpred score <sup>b</sup> | Parent protein       | Potential bioactive peptides <sup>d</sup> | Biological function <sup>d</sup>                                          |
|------------------|---------|----------------------------------|----------------------------|----------------------|-------------------------------------------|---------------------------------------------------------------------------|
| LIVPQN           | 682.82  | 0.15                             | 0.14                       | Globulin/<br>Legumin | VP, PQ, IV, LI, QN                        | ACE inhibitor, glucose uptake stimulation, DPP-IV inhibitor               |
| RQGQLIVVPQN      | 1251.45 | 0.13                             | 0.30                       | Globulin             | VP, GQ, QG, PQ, IV, LI, VV, QL, QN        | ACE inhibitor, neuropeptide, glucose uptake stimulation, DPP-IV inhibitor |

<sup>a</sup>From PeptideRanker. <sup>b</sup>From CPPpred. <sup>c</sup>From ExPASy ProtParam. <sup>d</sup>From BIOPEP.
